# Supplementary material for: Drug-perturbation-based stratification of blood cancer
Source: JCI journal article supplement (doi:10.1172/jci93801), 2017-12-10
Supplement: sd1 [file 1]

# Supplementary Figures and Tables

November 30, 2017

## Drug Perturbation Based Stratification of Blood Cancer

Sascha Dietrich, MD\*, Małgorzata Oleś, PhD\*, Junyan Lu, PhD\*, Leopold Sellner, MD, Simon Anders, PhD, Britta Velten, Bian Wu, MD, Jennifer Hüllein, PhD, Michelle da Silva Liberio, Tatjana Walther, Lena Wagner, Sophie Rabe, Sonja Ghidelli-Disse, Marcus Bantscheff, PhD, Andrzej K. Oleś, PhD, Mikołaj Słabicki, PhD, Andreas Mock, Christopher C. Oakes, PhD, Shihui Wang, Sina Oppermann, Marina Lukas, Vladislav Kim, Martin Sill, PhD, Axel Benner, Anna Jauch, PhD, Lesley Ann Sutton, PhD, Emma Young, Richard Rosenquist, PhD, Xiyang Liu, MD, Alexander Jethwa, Kwang Seok Lee, Joe Lewis, PhD, Kerstin Putzker, Christoph Lutz, MD, Davide Rossi, MD, Andriy Mokhir, PhD, Thomas Oellerich, MD, Katja Zirlik, MD, Marco Herling, MD, Florence Nguyen-Khac, MD, Christoph Plass, PhD, Emma Andersson, Satu Mustjoki, PhD, Christof von Kalle, MD, Anthony D. Ho, MD, Manfred Hensel, MD, Jan Dürig, MD, Ingo Ringshausen, MD, Marc Zapatka, PhD, Wolfgang Huber, PhD and Thorsten Zenz, MD.

\* These authors contributed equally to this work

# Contents

|          |                                                                        |           |
|----------|------------------------------------------------------------------------|-----------|
| <b>1</b> | <b>Data availability</b>                                               | <b>5</b>  |
| <b>2</b> | <b>Supplementary methods</b>                                           | <b>5</b>  |
| 2.1      | Western blot analysis . . . . .                                        | 5         |
| <b>3</b> | <b>Quality assessment and control</b>                                  | <b>5</b>  |
| <b>4</b> | <b>Data analysis</b>                                                   | <b>5</b>  |
| 4.1      | Raw data analysis . . . . .                                            | 5         |
| 4.2      | Whole exome sequencing analysis . . . . .                              | 6         |
| 4.3      | RNA-seq analysis . . . . .                                             | 6         |
| 4.4      | SNP array analysis . . . . .                                           | 6         |
| 4.5      | Integrative data analysis . . . . .                                    | 6         |
| 4.6      | Associations of ex-vivo drug responses with genomic features . . . . . | 6         |
| 4.7      | Batch effects . . . . .                                                | 6         |
| 4.8      | Gene expression and gene set enrichment analysis . . . . .             | 7         |
| 4.9      | Survival analyses . . . . .                                            | 7         |
| 4.10     | Penalized multivariate regression . . . . .                            | 7         |
| <b>5</b> | <b>Supplementary figures</b>                                           | <b>8</b>  |
| <b>6</b> | <b>Supplementary tables</b>                                            | <b>37</b> |

## List of Figures

|     |                                                                                                                                         |    |
|-----|-----------------------------------------------------------------------------------------------------------------------------------------|----|
| S1  | Drug induced effects on cell viability . . . . .                                                                                        | 8  |
| S2  | Inhibition of calcium release after IgM stimulation . . . . .                                                                           | 8  |
| S3  | Effect of AZD7762 on key signaling cascade members of the B-cell receptor pathway . . . . .                                             | 9  |
| S4  | AZD7762 induces apoptosis of primary CLL cells . . . . .                                                                                | 10 |
| S5  | Association between the response to HSP90 inhibitors and IGHV status . . . . .                                                          | 11 |
| S6  | Drug-drug correlations in MCL and T-PLL . . . . .                                                                                       | 12 |
| S7  | Summary of disease-specific drug effects . . . . .                                                                                      | 13 |
| S8  | Global overview of drug response landscape . . . . .                                                                                    | 14 |
| S9  | Relative effects of BCR inhibitors (SYK, PI3K), everolimus (mTOR) and selumetinib (MEK) on cell viability and gene expression . . . . . | 15 |
| S10 | Derivation of thresholds for the decision tree model . . . . .                                                                          | 16 |
| S11 | Characterization of drug response groups in CLL . . . . .                                                                               | 17 |
| S12 | Gene expression associated with the BTK group . . . . .                                                                                 | 18 |
| S13 | Gene expression associated with the MEK and mTOR groups . . . . .                                                                       | 19 |
| S14 | Correlation of IL-10 mRNA expression and response to everolimus within the mTOR group . . . . .                                         | 20 |
| S15 | Response to cytokines in CLL . . . . .                                                                                                  | 21 |
| S16 | Ibrutinib induces apoptosis in primary CLL cells . . . . .                                                                              | 22 |
| S17 | Effect of mutations on drug response . . . . .                                                                                          | 23 |
| S18 | Drug response in CLL stratified by pretreatment . . . . .                                                                               | 24 |
| S19 | Associations of drug sensitivities with gene mutations and structural aberrations in CLL . . . . .                                      | 25 |
| S20 | Impact of pretreatment on associations of drug sensitivities with gene mutations . . . . .                                              | 26 |
| S21 | Drug response associated with trisomy 12 within U-CLL and M-CLL . . . . .                                                               | 27 |
| S22 | Drug response associated with trisomy 12 . . . . .                                                                                      | 28 |
| S23 | Gene expression associated with trisomy 12 . . . . .                                                                                    | 29 |
| S24 | Gene set enrichment analysis for trisomy 12 . . . . .                                                                                   | 30 |
| S25 | Prevalence of trisomy 12 across different malignancies . . . . .                                                                        | 31 |
| S26 | Lasso model for rotenone . . . . .                                                                                                      | 31 |
| S27 | Impact of genetic factors on survival . . . . .                                                                                         | 32 |
| S28 | Impact of drug response on survival in untreated patients . . . . .                                                                     | 33 |
| S29 | ATP luminescence of DMSO controls at the beginning and after 48 h of incubation . . . . .                                               | 34 |
| S30 | Assessment of batch effects . . . . .                                                                                                   | 35 |
| S31 | Reproducibility of drug response measurements . . . . .                                                                                 | 36 |

## List of Tables

|     |                                                                                                    |    |
|-----|----------------------------------------------------------------------------------------------------|----|
| S1  | Drugs . . . . .                                                                                    | 37 |
| S2  | Drug concentrations . . . . .                                                                      | 39 |
| S3  | Patient characteristics . . . . .                                                                  | 41 |
| S4  | Sequencing quality . . . . .                                                                       | 45 |
| S5  | Target profiling of AZD7762 and PF477736 in cell lysates of K562 cells . . . . .                   | 48 |
| S6  | Multivariate Cox regression model for overall survival with response to fludarabine as a covariate | 50 |
| S7  | Multivariate Cox regression model for overall survival with response to doxorubicin as a covariate | 50 |
| S8  | Multivariate Cox regression model for time to treatment with response to ibrutinib as a covariate  | 51 |
| S9  | Multivariate Cox regression model for time to treatment with response to idelalisib as a covariate | 51 |
| S10 | Multivariate Cox regression model for time to treatment with response to PRT62607 as a covariate   | 51 |

## 1 Data availability

European Genome-phenome Archive (EGA) accession EGAS00001001746.

## 2 Supplementary methods

### 2.1 Western blot analysis

Protein amount was determined using the BSA assay following the manufacturer’s protocol. For cell lines 30  $\mu\text{g}$  protein and for primary cells 15  $\mu\text{g}$  protein was loaded on a 4–15% gradient SDS polyacrylamide gel (Bio-Rad). For comparative evaluation of molecular mass, 5  $\mu\text{l}$  of PageRuler Prestained Protein Ladder (Thermo Scientific) was loaded next to protein samples. Proteins were transferred to a PVDF membrane (TransBlot® Turbo™ mini-size LF PVDF membrane, Bio-Rad) using the 30 min. standard transfer program of the TransBlot® Turbo™ (Bio-Rad). After blocking with 5% BSA (w/v), membranes were probed with primary antibodies either against PARP or against BTK, Syk, Akt and S6 ribosomal protein (1:1000 dilution, respectively), and against the phospho-proteins p-BTK (Tyr223), p-Syk (Tyr525/526), p-Akt (Ser473) and p-S6 ribosomal protein (Ser240/244) (1:500 dilutions) at 4 degrees celsius overnight, followed by 1 hour incubation at room temperature (RT). Membranes were washed three times with TBST and exposed to the appropriate HRP-conjugated secondary anti-rabbit or anti-mouse antibody (1:10 000) for 1 hour at RT and washed three times with TBST for 10 minutes before chemiluminescence detection. Proteins were detected with an enhanced chemiluminescence substrate solution (EZ-ECL, BI Biological Industries) using the semi-automated Chemidoc camera-based imager (Millipore). Equal protein loading and quality was controlled by stripping the blots for 15-20 minutes at RT in Restore Western blot Stripping buffer (Pierce), washing twice in TBST at RT, blocking with 5% bovine serum albumin for 1 hour, and re-probing the membrane with an anti-Actin antibody (1:10 000) and anti-mouse secondary antibody.

The following antibodies were used: primary antibodies against PARP (Rabbit mAb, #9542), Akt (40D4 Mouse mAb, #2920S), p-Akt (Ser473, D9E Rabbit mAb, #4060S), S6 ribosomal protein (5G10 Rabbit mAb, #2217S), p-S6 ribosomal protein (Ser240/244, Rabbit, #2215S), BTK (D3H5 Rabbit mAb, 8547S), p-BTK (Tyr223, Rabbit, 5082S), p-Syk (Tyr525/526, C87C1 Rabbit mAb, #2710S) were purchased from Cell Signaling Technology (ZA Leiden, Netherlands) and used in a 1:1000 or 1:500 (phospho-antibodies) dilution in 5% BSA. The monoclonal antibody against Syk (4D10 Mouse, #sc-1240) was used at a 1:1000 dilution and was obtained from Santa Cruz Biotechnology. To ensure equal loading membranes were re-probed using the primary anti- $\beta$ -actin antibody (8H10D10 Mouse mAb, #3700) from Cell Signaling (ZA Leiden, Netherlands) at 1:5000 dilution or anti-GAPDH-peroxidase antibody (clone GAPDH-71.1 Mouse mAb, #G9295) from Sigma-Aldrich at 1:30000. Mouse and rabbit- secondary HRP-conjugated antibodies were purchased from abcam (rabbit-HRP ab6721, mouse-HRP ab6728) and used at a 1:10000 dilution in 5% BSA.

## 3 Quality assessment and control

We used multiple steps of data quality assessment. First, we assessed the sensitivity of the platform by asking whether it could detect known gene-drug associations and expected correlations between similar drugs. To assess the robustness of the platform and safeguard against “batch effects” that have the potential to confound high-throughput experiments, we repeated the analyses taking the time point of experiments as potential batch confounders into account Supplementary Fig. S30. In addition, we assessed the reproducibility between different batch time points and compared the same samples from three patients in independent experiments Supplementary Fig. S31. The data were highly reproducible (Pearson correlation coefficients: 0.74, 0.86, 0.92 (48 h) and 0.81, 0.85 and 0.90 (72 h)

## 4 Data analysis

### 4.1 Raw data analysis

To quantify the response of a patient sample to a drug at a given concentration, we used viability relative to control; this value is the CellTiter Glo luminescence readout of the respective well divided by the median of luminescence readouts of the 32 DMSO control wells on the same plate. We used the R/Bioconductor package cellHTS2 version 2.26.0 [1] for processing the raw files obtained from the plate scanner.

## 4.2 Whole exome sequencing analysis

Reads were mapped to the human reference genome (GRCh 37.1 / hg 19) using BWA (version 0.6.2)(68) with default parameters and maximum insert size 1000 nt. BAM files were sorted with SAMtools (version 0.1.19), and duplicates were marked with Picard tools (version 1.90). The resulting mean coverage was 105x (range 56x – 193x) Table S4. For the detection of single-nucleotide variants (SNVs), we applied a genome sequencing analysis pipeline established at DKFZ, which is based on SAM-tools mpileup and bcftools with parameter adjustments to allow for calling of somatic variants with heuristic filtering as previously described [2]. After annotation with RefSeq (version September 2013) using ANNOVAR [3], somatic, non-silent coding variants of high confidence were selected.

## 4.3 RNA-seq analysis

The RNA-Seq reads were demultiplexed and aligned to the human reference genome (GRCh 37.1 / hg 19) using STAR version 2.3.0 [4] with default parameters. Read counts per gene were obtained with htseq-count [5] using the default mode union. Differential expression calling was performed using DESeq2 [6].

## 4.4 SNP array analysis

IDAT files were processed using GenomeStudio (Illumina, San Diego, CA, USA). Features located on sex chromosomes were excluded from the analysis. Segmentation of the normalized log<sub>2</sub> ratios was performed by applying the circular binary segmentation (CBS) algorithm available [7] in the R/Bioconductor package DNACopy version 1.38.1. Segments with a mean log<sub>2</sub> ratio deviating by more than 0.18 from the median log<sub>2</sub> ratio calculated over all features were called chromosomal gain or loss, respectively. To identify regions of allelic imbalance and loss of heterozygosity (LOH), we used the approach of reference [8].

## 4.5 Integrative data analysis

Analyses were performed using R version 3 and included univariate association tests, multivariate regression with and without lasso penalization, Cox regression, generalized linear models, principal component analysis and clustering. We used a model-free data analysis approach that did not rely on fitting parametric response curve models. Generally, we considered the data from each concentration separately to allow for dose-dependent target specificity. For some visualizations and lasso models (as indicated), we used averages of responses either at all concentrations, or at the two lowest concentrations for kinase inhibitors, where off-target activity at higher doses was a concern. For Figure 6a, the data for 17 drugs each at two concentrations were considered: for fludarabine and nutlin-3 at the two highest concentrations, for the other 15 at each of the two lowest concentrations. A version of the same visualization, using all drugs that passed quality control and showing more concentrations, is provided in Supplementary Fig. S8. For each column, median and 1.4826 times the median absolute deviation (i. e., a robust estimator of scale that coincides with the standard deviation in the case of normal data) were computed, and data in each column were centered and scaled by these values, resulting in robust z-scores. The heatmap was plotted using the CRAN package pheatmap. The rows (patients) were grouped by disease category. Within each group, an ordering of the rows was obtained from the dendrogram that resulted from hierarchical clustering with the Euclidean metric (R function *hclust*). Within-tree branch flips were permitted to arrange responders to BCR inhibitors towards the top. The columns were globally ordered using the dendrogram order produced by *hclust* with default branch arrangement.

## 4.6 Associations of ex-vivo drug responses with genomic features

We tested for associations between drug viability assay results and genomic features by Student’s t-tests (two-sided, with equal variance). Each concentration was tested separately. We tested somatic mutations (aggregated at the gene level), copy number aberrations, methylation groups (low programmed: LP, intermediate programmed: IP, High programmed: HP) and IGHV status. We restricted the analysis to features that were present in at least 3 patient samples (63 features). p-values were adjusted for multiple testing by applying the Benjamini-Hochberg procedure. For Figure 9a and Supplementary Fig. S19 and S20 viabilities across different drug concentrations were aggregated using Tukey’s median polish method.

## 4.7 Batch effects

The screen was performed in three groups of batches over a time period of 1.5 years. To control for confounding by the different batch groups we repeated the drug-feature association tests using batch group as a blocking factor and a two-way ANOVA test. We then compared the p-values from both tests (Supplementary Fig. S30). Only one drug, bortezomib, showed discrepant p-values, and exploration of its data suggested that it lost its

activity during storage. The data for this drug were not used for further analysis. For all remaining associations, testing with and without batch as a blocking factor yielded equivalent results. Therefore, all reported p-values for associations are taken from the t-tests without blocking for batch effects.

## 4.8 Gene expression and gene set enrichment analysis

For the  $n = 123$  patient samples for which we had drug sensitivity data and RNA-Seq data, we searched for associations of these two data types. Using the DESeq2 method we regressed the RNA-Seq read count data onto the drug response groups (BTK, MEK, mTOR, weak responder). Differentially expressed genes between groups were selected (raw p-value  $< 0.05$ ) and ranked by their test statistics. Parametric Analysis of Gene Set Enrichment (PAGE) [9] was applied to the ranked lists with the C6 and H gene set selections from the MSigDB database (<http://software.broadinstitute.org/gsea/msigdb>). The same procedure was used to identify gene expression signatures of CLL patient samples with trisomy12.

## 4.9 Survival analyses

Survival times were calculated from the time of sample collection to death (overall survival: OS) or to treatment (time to treatment: TTT). Follow-up information to calculate OS was available for all 184 CLL patients. For 174 of 184 CLL patients treatment information after sample collection was available. The impact of genomic features on survival endpoints was tested using the log-rank test. Impact of normalized drug responses as continuous variables on survival endpoints was calculated by univariate Cox regression modeling. Multivariate Cox regression modeling was performed to assess the impact of drug responses on survival endpoints in the context of important other covariates. For visualization purposes (i.e., not for inference), optimal cut-points of drug responses were calculated using maximally selected rank statistics as computed by the R/CRAN package `maxstat` [10]. Based on these cut points, patients were split into two groups, and their survival data were plotted using the Kaplan-Meier method.

## 4.10 Penalized multivariate regression

We performed multivariate regression to explain drug responses by the available potential predictors. We used a Gaussian linear model with L1-penalty (i.e., lasso regression) as implemented in the R package `glmnet` version 2.0 [11] with mixing parameter  $\alpha = 1$ .

As the dependent variable, the average viability value across all 5 concentrations was used for the chemotherapeutics (fludarabine, doxorubicine and nutlin-3) and the average of the two lowest concentrations for the targeted drugs (ibrutinib, idelalisib, selumetinib, everolimus and PRT062607). As input to the model, the expression data were normalized and transformed using the *varianceStabilizingTransformation* function from DESeq2, and both expression and methylation data were filtered to include only the top 5000 most variable features each. Gene mutations were only included in the model if present in at least 5 samples. Features with more than 10% missing values were excluded, and only patients that were characterized in at least 90% of each data type's features were included in the model. Remaining missing values were imputed by the mean for methylation data and by the most common mutation status for genetic data.  $n = 102$  samples were used for model fitting.

As predictors in the lasso model the genetic mutations ( $p = 11$ ) and IGHV status (coded as 0-1), demographics (age, sex), pretreatment (coded as 0-1) and the top 20 principal components of gene expression and methylation data were used. All features were scaled to unit variance and mean zero before using lasso to achieve fair treatment of all predictors by the penalty constraint.

To compare explanatory power of different data sets (Figure 11), a separate model was fit including only predictors of one omic type at a time as well as a joint model including all predictors. Using 10-fold cross-validation the optimal penalty parameter  $\lambda$  was chosen to minimize the cross-validated  $R^2$  of the model using the function `cv.glmnet`. As a measure of explained variance the reduction in cross-validated mean squared error relative to the null model was calculated. For single features, i.e., IGHV, the  $R^2$  from a standard linear model was used as corresponding quantity. Mean and standard error of the explained fraction of variance were obtained from 100 repetitions of cross-validation.

For the models shown Figure 12, only genetic features, IGHV status, pretreatment (coded as 0, 1) and methylation cluster (coded as 0, 0.5, 1) were considered, which resulted in  $n = 168$  cases and  $p = 13$  features after removal of features with more than 10% missing values. Remaining missing values were assumed to be 0. Adaptive lasso [12] was used to consistently select genetic features that modulate drug response. The model was fit using the function `glmnet` without standardization of the predictors and with penalty factors given by the inverse of the absolute coefficients from a linear model fit. Using 10-times repetition of 10-fold cross-validation, the optimal penalty parameter  $\lambda$  was chosen to minimize the cross-validated  $R^2$  of the model using the function `cvr.glmnet` from the R package `ipflasso`.

## 5 Supplementary figures

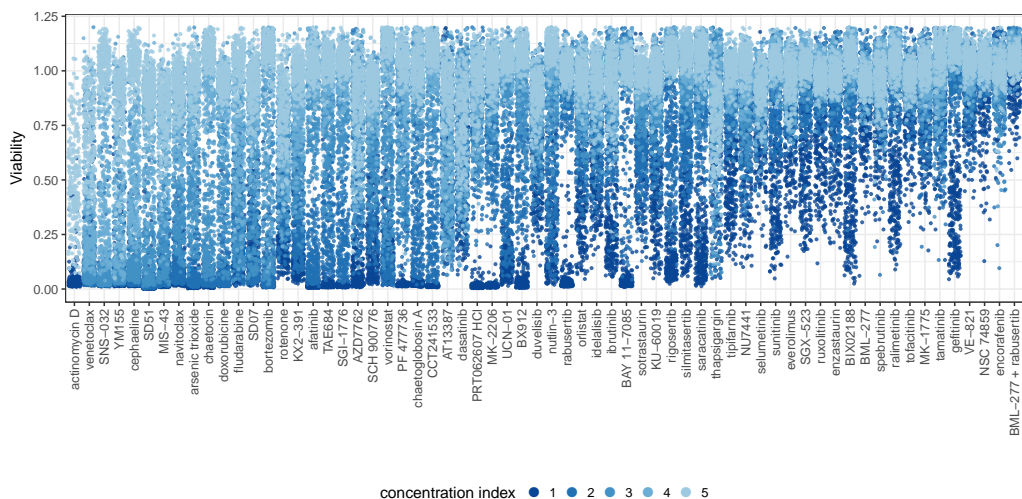

Figure S1: **Drug induced effects on cell viability.**

Relative cell viability of 246 primary tumor samples, compared to negative control, after treatment with  $n = 64$  drugs at 5 concentrations each is shown along the  $y$ -axis. Drug concentrations are color coded, highest concentration: 1, lowest concentration: 5. The plot shows high variability of effects between different drugs, from mostly lethal (left) to mostly neutral (right), concentration dependence of effects and high variability of effects of the same drug/concentration across patients.

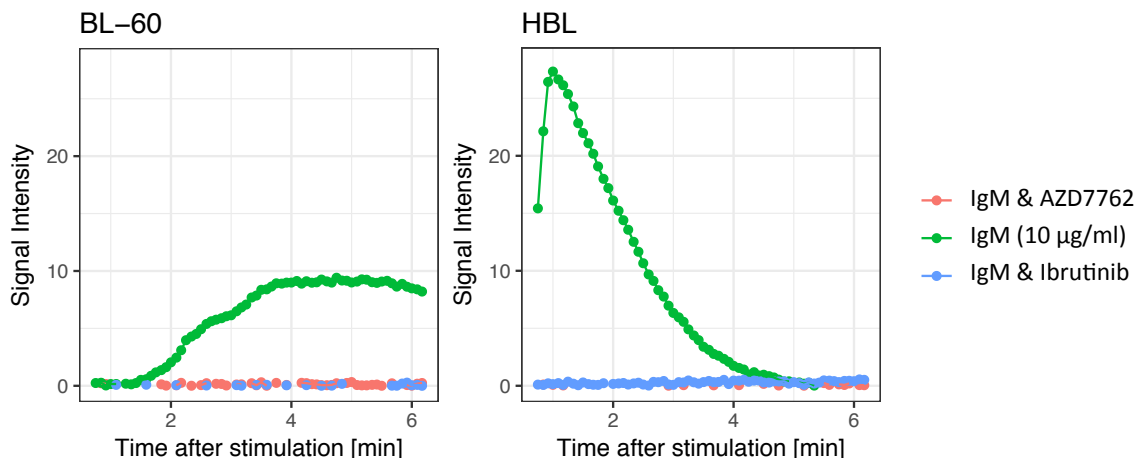

Figure S2: **Inhibition of calcium release after IgM stimulation.**

BL-60 and HBL-2 cells were stained with Fluo-8 (abcam), a calcium sensitive fluorescence dye.  $5 \times 10^4$  cells/well were re-suspended in RPMI containing 1% FBS and stained according to the manufacturer's instructions. After pre-incubation with ibrutinib (500nM) and AZD7762 (500nM), cells were imaged over a period of 6.3 minutes with a Zeiss cell observer microscope and a 2.5x objective. IgM (BD) was added to achieve a final concentration of  $10 \mu\text{g/ml}$ . A constant frame of  $180.6 \mu\text{m}^2$  was chosen and the mean intensity for each frame and time point was calculated. Both ibrutinib and AZD7762 blocked calcium mobilization after IgM stimulation.



**A**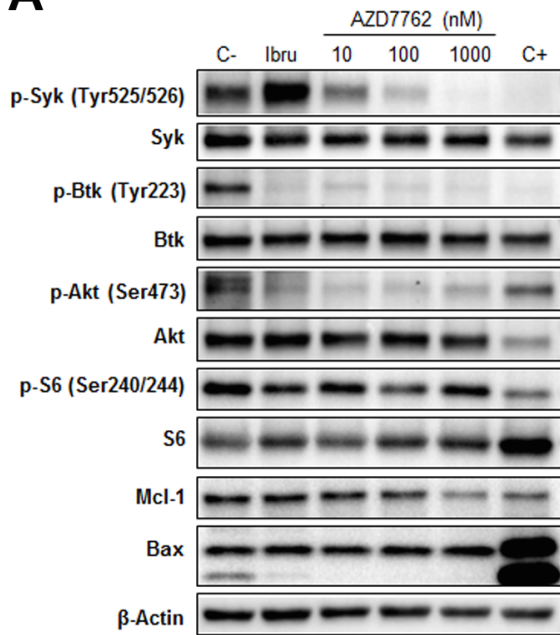**B**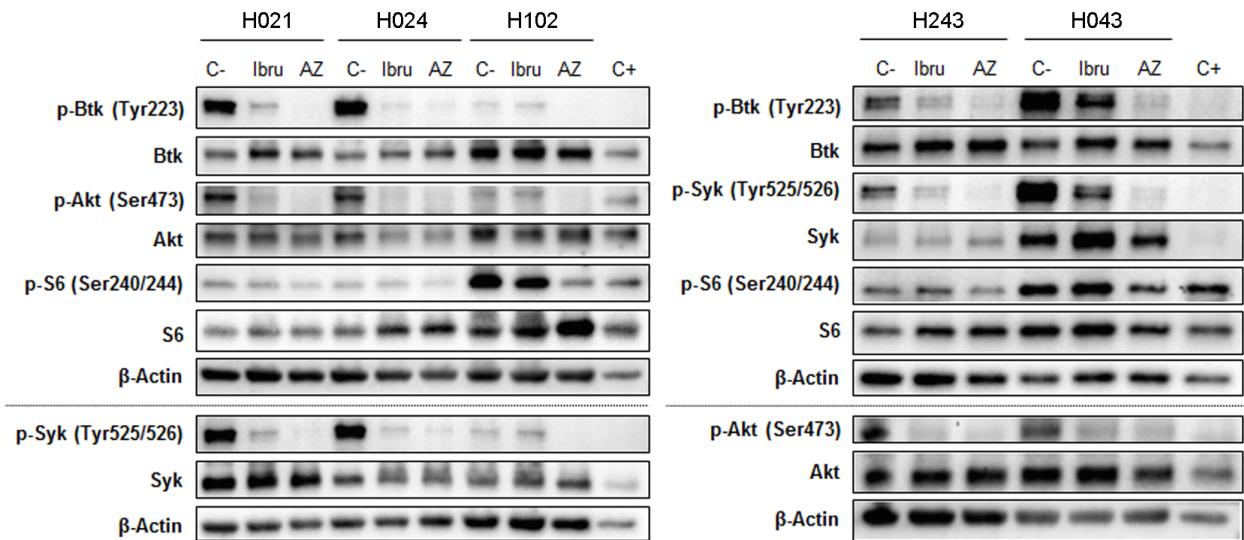

Figure S3: **Effect of AZD7762 on key signaling cascade members of the B-cell receptor pathway.** AZD7762 inhibited the phosphorylation of proteins involved in BCR signaling. Western blot analysis of the human mantle cell lymphoma cell line HBL-2 (**A**) and primary CLL cells (**B**) after 4 h treatment with AZD7762. DMSO, 0.001% (v/v), was used as vehicle control (C-), and cell lysate of GRANTA was used as antibody control (C+). Primary samples were treated with 500 nM AZD7762 (AZ) or Ibrutinib (Ibru): 500 nM. Data shown in (**A**) are representative of three independent experiments. Blots shown in (**B**) are the result of a single experiment. For each condition 15  $\mu$ g of protein lysate were loaded. Membranes were probed with phospho- and total protein specific antibodies as indicated.

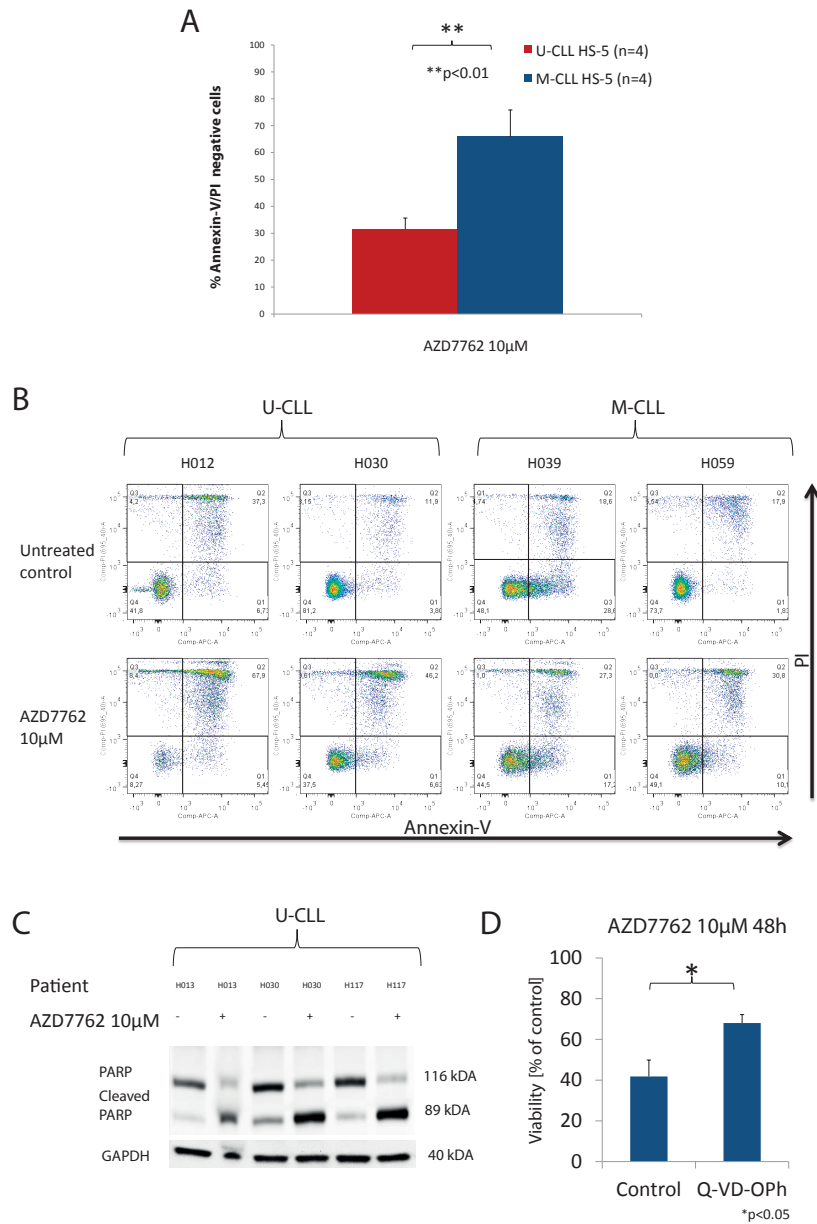

Figure S4: **AZD7762 induces apoptosis of primary CLL cells.**

**Panel A)** shows AZD7762 (CHEK1/2 inhibitor) induced apoptosis in primary CLL cells co-cultured with stroma cells (HS-5 cells). Apoptosis induction was measured after 48 h of drug exposure by flow cytometry and annexin-V / propidium iodid (PI) stains. Data was normalized to untreated controls. U-CLL ( $n = 4$ ) patient samples are more sensitive to AZD7762 than M-CLL ( $n = 4$ ) patient samples ( $p < 0.01$ ).

**Panel B)** shows examples of FACS plots for U-CLL ( $n = 2$ ) and M-CLL ( $n = 2$ ) patient samples treated with  $10 \mu\text{M}$  AZD7762 and untreated controls).

**Panel C)** shows western blots demonstrating PARP cleavage in U-CLL patient samples ( $n = 3$ ) exposed to AZD7762, as a sign of apoptosis induction.

**Panel D)** shows U-CLL patient samples treated for 48 h with  $10 \mu\text{M}$  Q-VD-Oph (pan-caspase inhibitor) and/or  $10 \mu\text{M}$  AZD7762. Apoptosis induction of AZD7762 could be in part inhibited by the pan-caspase inhibitor Q-VD-Oph, which indicates that the majority of AZD7762 mediated cell death is through apoptosis.

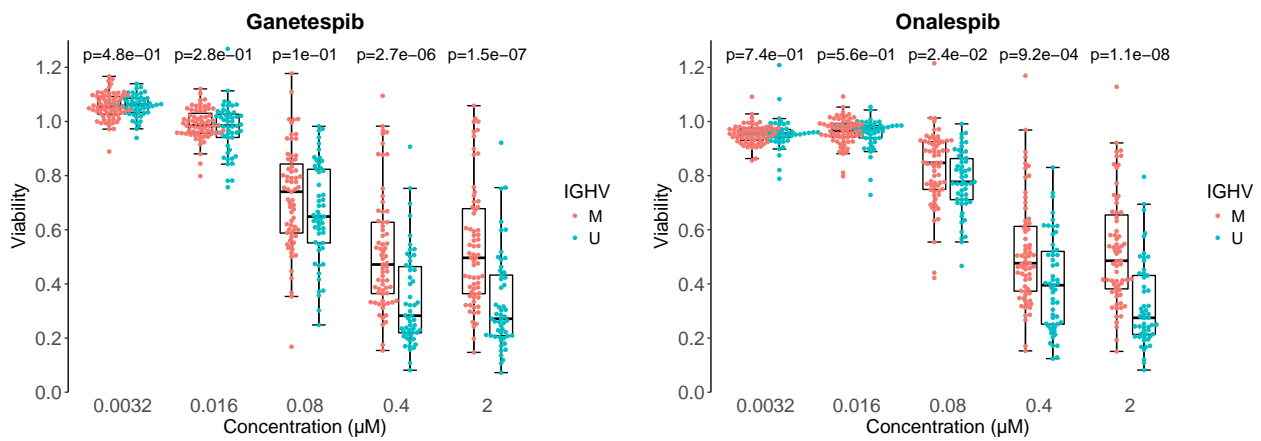

Figure S5: **Association between the response to HSP90 inhibitors and IGHV status.** CLL patient samples (n=120) were treated with Ganetespi or Onalespi and studied for drug response ex-vivo. After treatment with five different concentrations for 48 hours, viability of CLL cells was measured with the CellTiterGlo assay. Viabilities are shown for IGHV mutated (M) and IGHV unmutated (U) CLL samples.

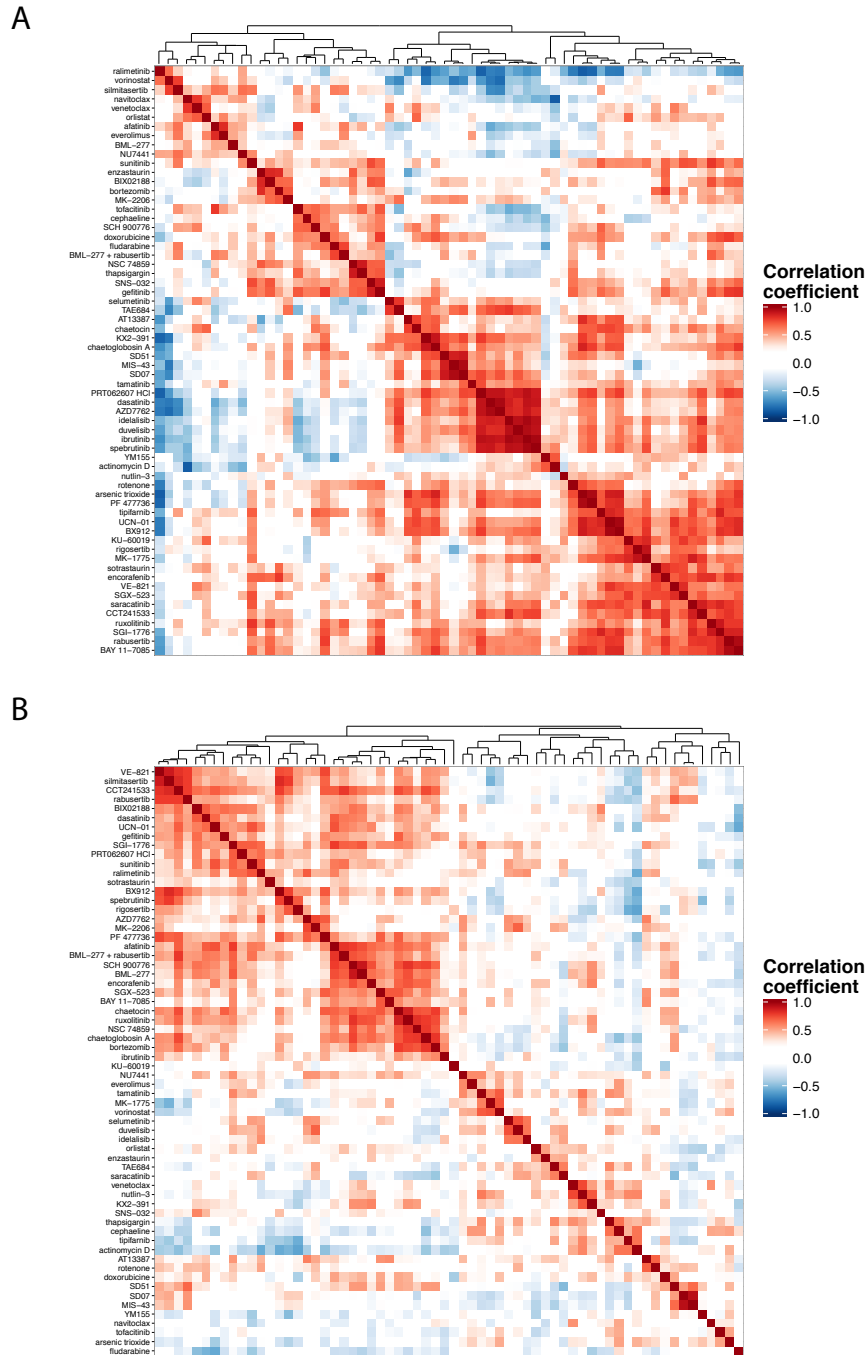

Figure S6: **Drug-drug correlations in MCL and T-PLL.**

The heatmaps show the drug-drug correlation matrices for all pairs of drugs for MCL and T-PLL. They complement Figure 3 in the main text. Pearson correlation coefficients were computed from the average of the drug responses at the two lowest concentration steps, within the subset of **(Panel A)** MCL patient samples ( $n = 10$ ) and **(Panel B)** T-PLL patient samples ( $n = 25$ ). Clusters of drugs with high correlation and anti-correlation are shown by red and blue squares, respectively. In MCL, the major clusters include: (I) kinase inhibitors of the B cell receptor, incl. idelalisib (PI3K), ibrutinib (BTK), duvelisib (PI3K), PRT062607 (SYK); (II) inhibitors of redox signaling / reactive oxygen species (MIS-43, SD07, SD51) and (III) BH3 mimetics (navitoclax, venetoclax). In T-PLL, the correlations are less pronounced, e.g., BTKi and PI3Ki correlations are largely lost.

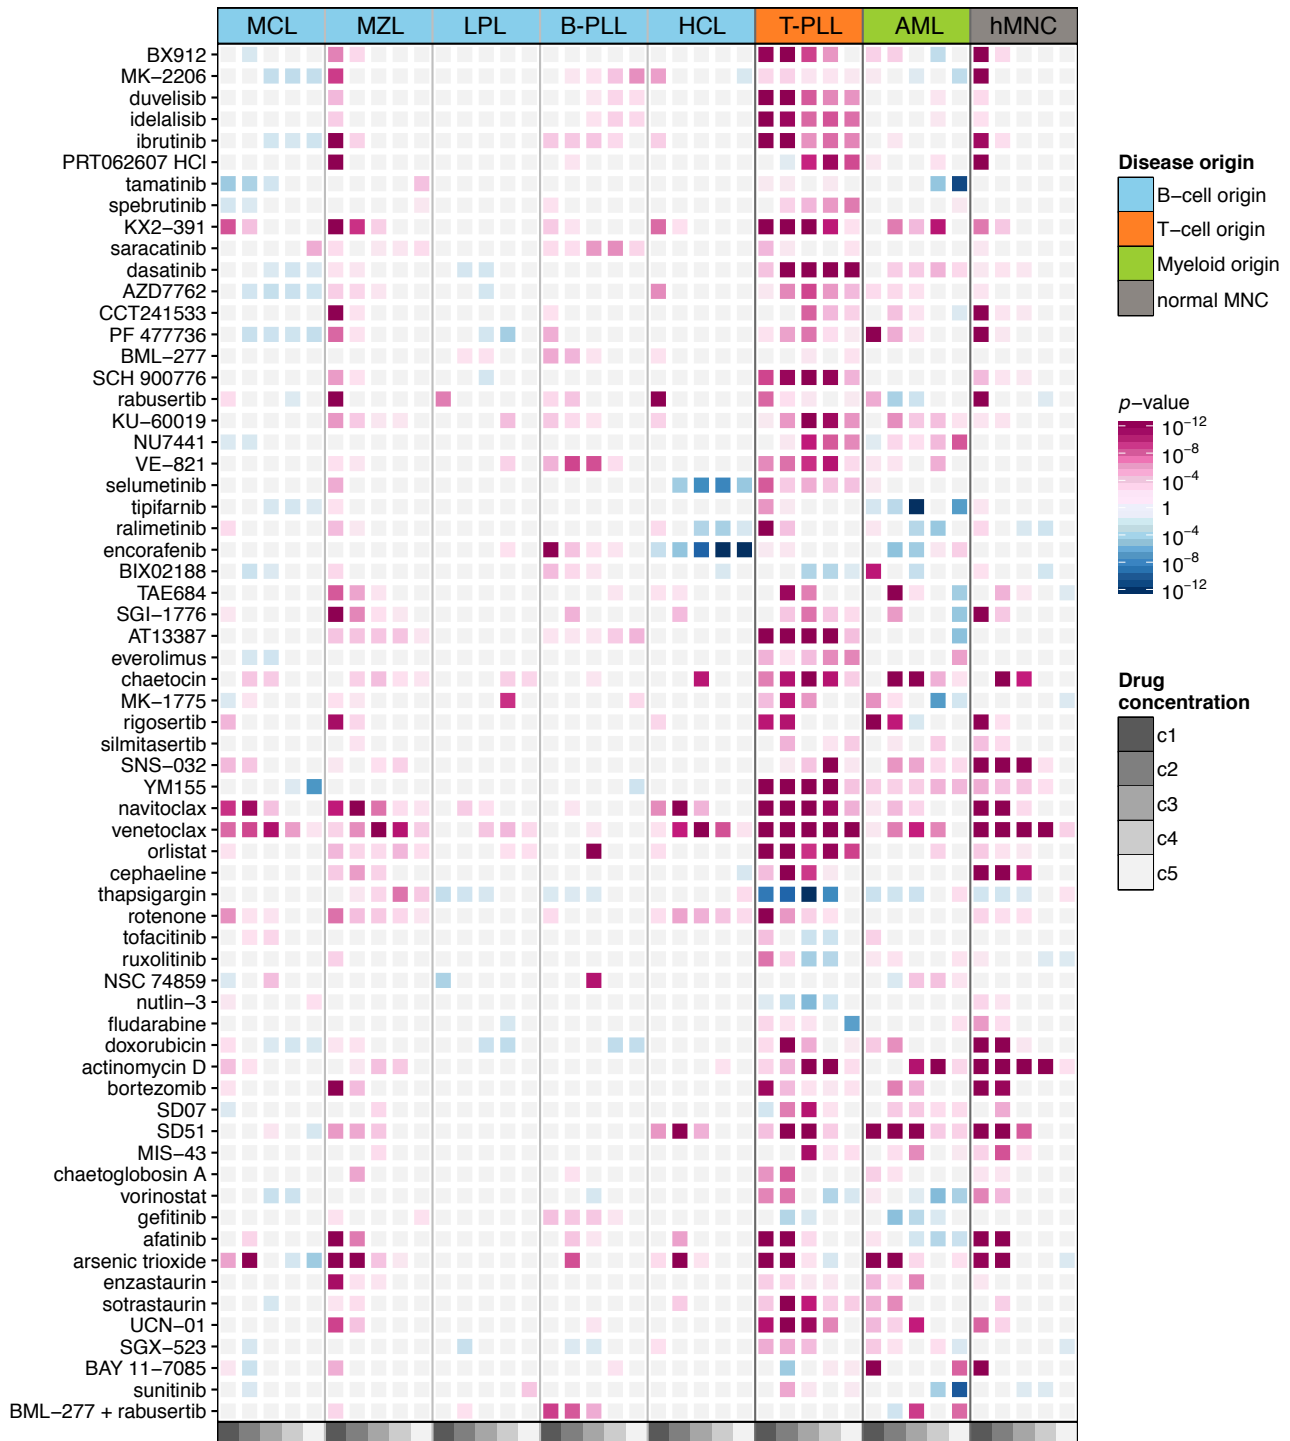

Figure S7: **Summary of disease-specific drug effects.**

The heatmap shows significant differences in drug responses of CLL samples (used as a common reference;  $n = 184$ ) versus MCL: mantle cell lymphoma ( $n = 10$ ), MZL: marginal zone lymphoma ( $n = 6$ ), LPL: lymphoplasmocytic lymphoma ( $n = 4$ ), B-PLL: B-Prolymphocytic leukemia ( $n = 3$ ), HCL: hairy cell leukemia ( $n = 3$ ), T-PLL: T-Prolymphocytic leukemia ( $n = 25$ ), AML: acute myeloid leukemia ( $n = 5$ ) and hMNC: human mononuclear cells ( $n = 3$ ). Drug responses between patient groups were compared with  $t$ -tests (null hypothesis: no difference), and two-sided p-values were computed. Multiple testing was accounted for with the Benjamini-Hochberg method, so that the rejection threshold corresponded to a false discovery rate (FDR) of 10%. Significant associations according to this threshold are shown with the color scale, where hue indicates the sign of the difference (pink: less, blue: more sensitive compared to CLL) and intensity the raw p-value, as indicated by the color key. Association tests for which the null hypothesis was not rejected are shown in light grey. The five columns within each block correspond to the five concentrations tested (c1: highest, c5: lowest, see Table S2).

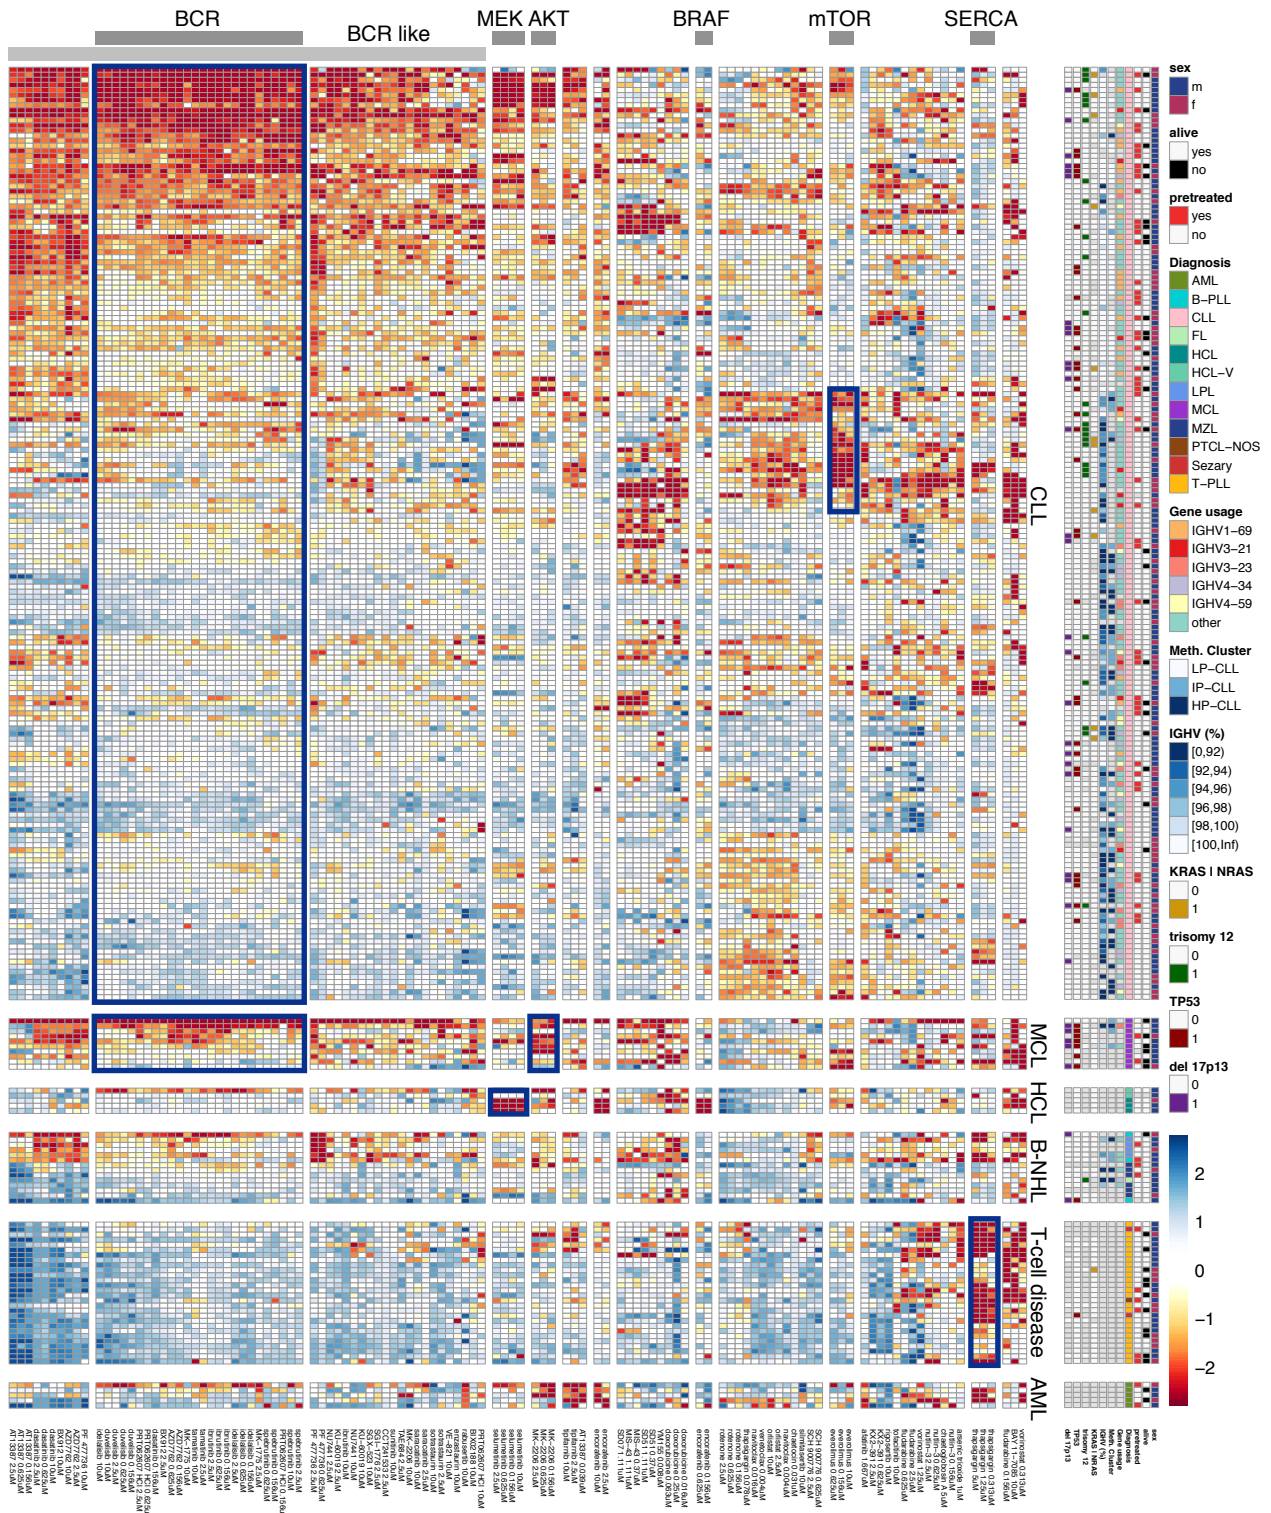

Figure S8: **Global overview of drug response landscape.**

The heatmap provides the drug response landscape for the 246 blood cancer samples. The viability measurements are shown on a z-score scale: for each column (response profile of a drug at one concentration), data were centered and scaled. 116 columns corresponding to a total of 53 drugs are shown (for the purpose of this visualization, 204 columns with insufficient variation across samples were omitted). The color bars to the right show sample annotations. The ordering of the samples and drugs was induced by a hierarchical clustering dendrogram (Euclidean metric, complete linkage). Prior to clustering, samples were divided into six disease groups, indicated by the horizontal gaps. Drug response based clustering indicates the existence of functionally defined disease subgroups.

A

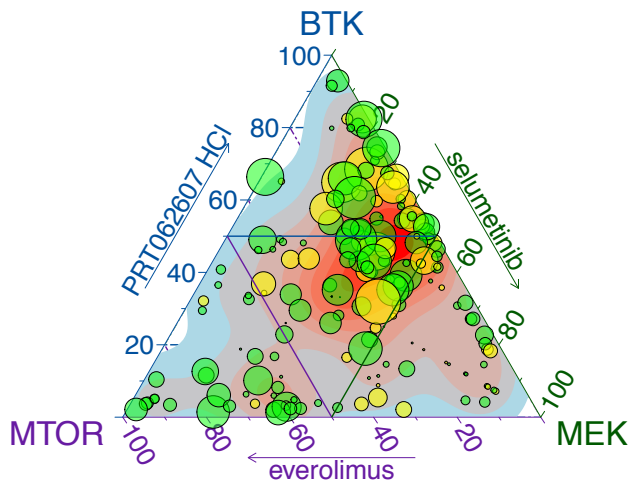

B

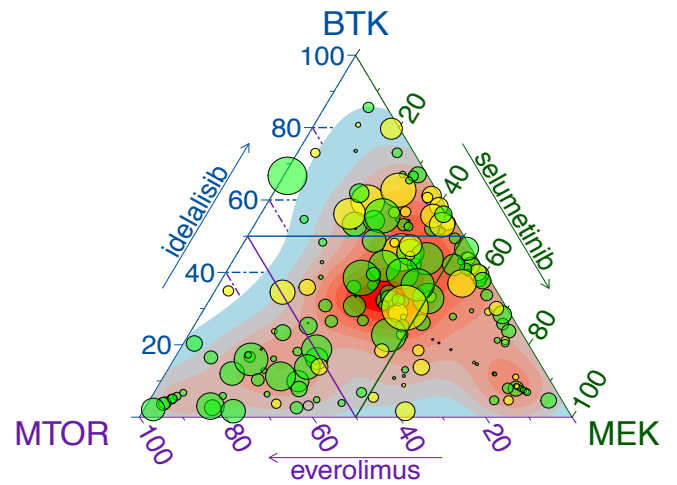

C

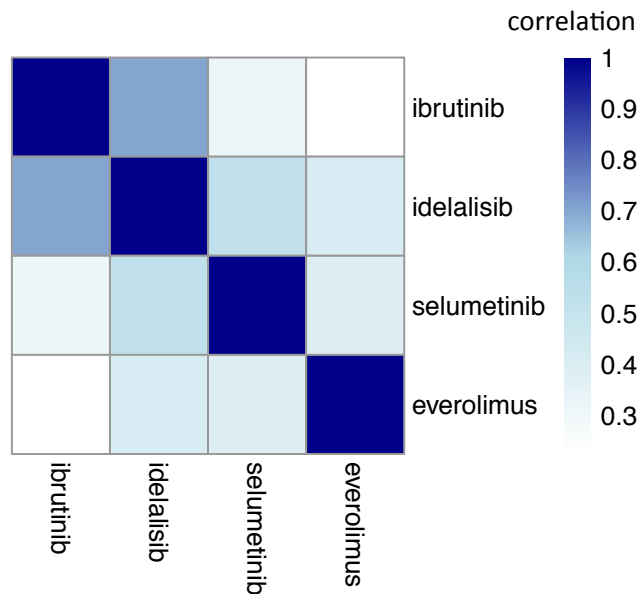

Figure S9: **Relative effects of BCR inhibitors (SYK, PI3K), everolimus (mTOR) and selumetinib (MEK) on cell viability and gene expression.**

Similar to Figure 6b in the main manuscript, but with PRT062607 HCl (SYK inhibitor, **Panel A**) and idelalisib (PI3K inhibitor, **Panel B**) instead of ibrutinib (184 CLL samples). Green dots represent pretreated samples. **Panel C**) Comparison of gene expression responses to drug treatments. 12 CLL samples (6 M-CLL and 6 U-CLL) were treated with ibrutinib, idelalisib, selumetinib, everolimus and negative control. Gene expression profiling was performed after 12 hours of drug incubation using Illumina microarrays. For each sample, drug and gene, the logarithmic fold change (LFC) between treatment and negative control was calculated, and the 2000 genes with highest median absolute LFC across samples and drugs were selected. LFCs were median-summarized across samples. For each pair of drugs, the correlation coefficient across the 2000 genes was calculated. The resulting correlation matrix is shown with the color code. The gene expression changes induced by idelalisib and ibrutinib were similar, whereas selumetinib and everolimus each led to expression changes of different genes.

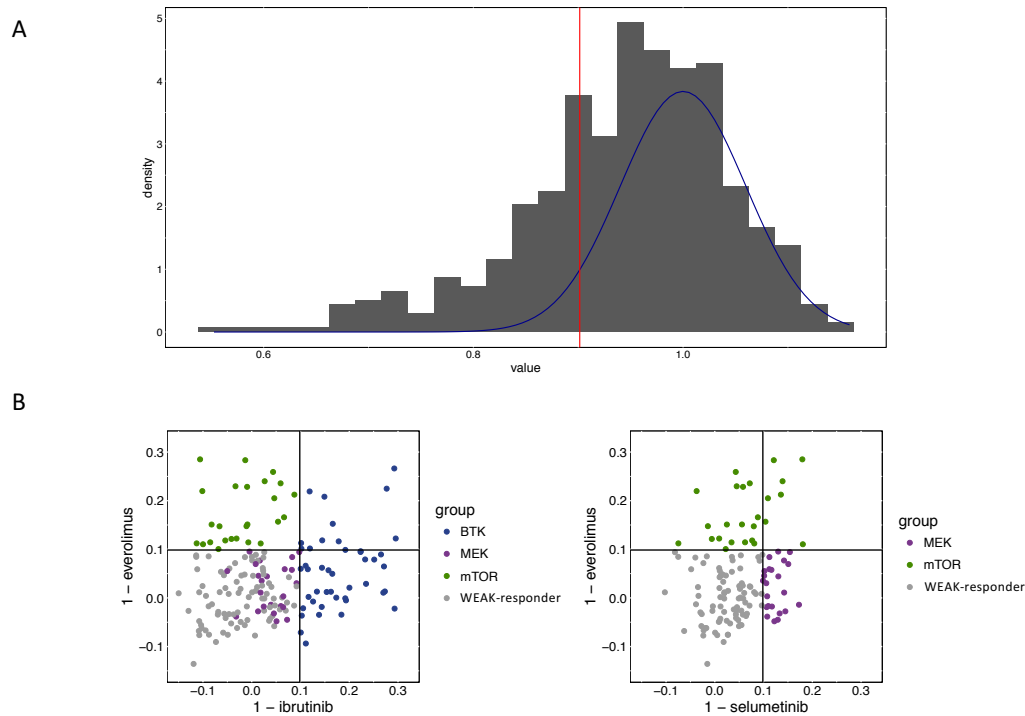

Figure S10: **Derivation of thresholds for the decision tree model.**

**Panel A)** For each of the drugs ibrutinib (targeting BTK), everolimus (mTOR) and selumetinib (MEK) we used the mean values from concentrations 156 nM and 625 nM and considered the distribution of these values across all CLL samples, shown in the histogram. In A) the histogram shows exemplarily the response to ibrutinib. We assumed that this distribution was a mixture of two components: (1) a null distribution (corresponding to no or negligible response to the drug), which is symmetric about 1, and (2) an alternative distribution (responders), which has negligible mass above 1. We then used the *mirror method*, as follows, to derive a common threshold for response versus weak response for all three drugs. First, we computed the standard deviation  $\sigma$  of the values  $\geq 1$ , with mean fixed to  $\mu = 1$ . The corresponding normal density is shown by the blue line. The observed values  $x$  were transformed into  $z$ -scores  $z = (x - \mu)/\sigma$ . If the assumption is made that the fitted normal density (blue line) is a good approximation of the null distribution, the  $z$ -score can be interpreted as a probability, namely the false positive rate (FPR) via the relation  $\text{FPR} = 1 - F_N(z)$ , where  $F_N$  is the standard normal distribution function. Setting the target FPR to 0.05 we derived the threshold of 0.9014 (vertical red line).

**Panel B)** Two-dimensional inverted scatterplots for response to ibrutinib versus everolimus, and selumetinib versus everolimus. Each point corresponds to a patient sample ( $n = 184$ ). The common threshold that we used to separate responders from weak-/non-responders is shown by the black lines. The axes are inverted and show 1-viability, hence the threshold 0.9014 derived in Panel A corresponds to 0.0986 in this representation. Weak responders (lower left quadrant) are color coded in grey, responders in green (mTOR), blue (BTK) or purple (MEK).



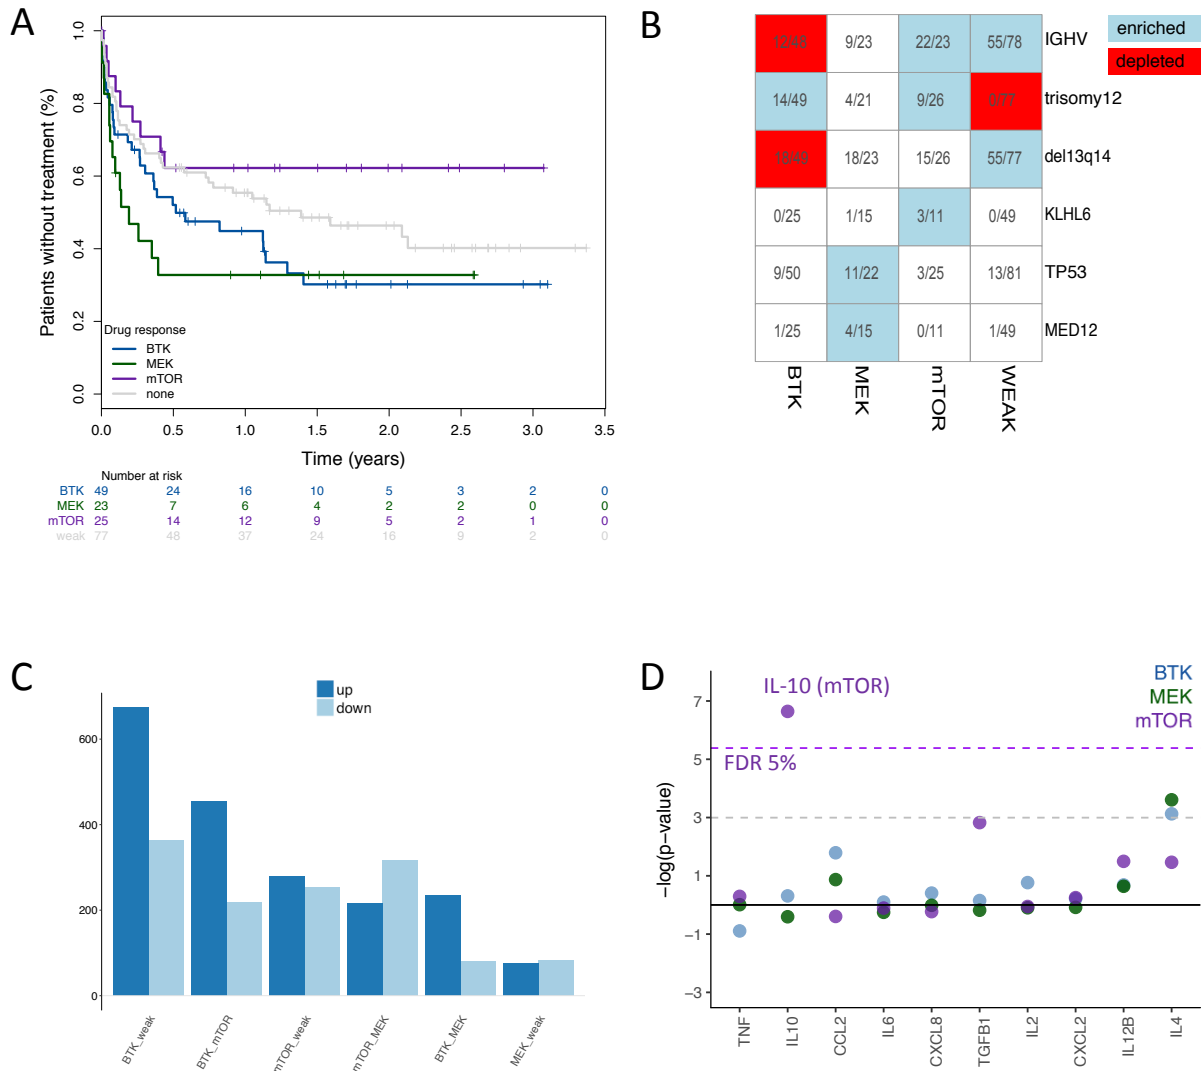

Figure S11: **Characterization of drug response groups in CLL.**

**Panel A)** Kaplan-Meier plot for time from sample collection to next treatment for the four groups. Patients in the mTOR-group had a longer time to next treatment (TTT) than patients in the BTK-group ( $p=0.05$ ) and MEK-group ( $p=0.02$ ). Other comparisons were not statistically significant. **Panel B)** Incidence of somatic gene mutations and CNVs in the four groups. Enrichment and depletion were assessed using Fisher-tests, and associations with  $p$ -value  $< 0.05$  are highlighted by colors. **Panel C)** Number of differentially expressed genes between drug response groups. Differentially expressed genes were calculated by the DESeq2 method (FDR 10%). These genes were largely not overlapping. A gene enrichment analysis for differentially expressed genes is provided in S12 and S13. **Panel D)** Significantly (FDR 5%) increased IL-10 mRNA expression in mTOR group patients (purple). Other important cytokines / chemokines were not differentially expressed.

## BTK group

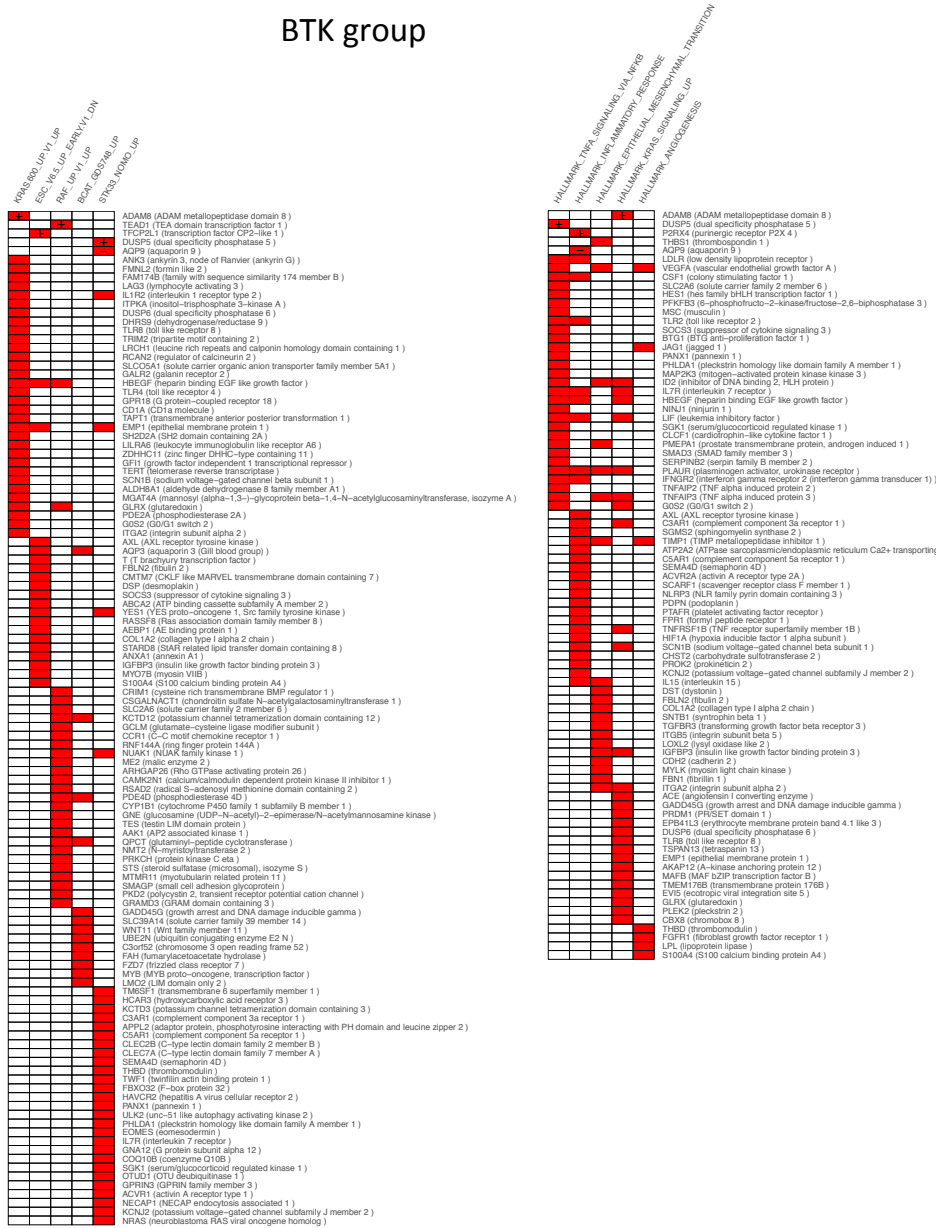

Figure S12: Gene expression associated with the BTK group.

Using the RNAseq data available for patient samples, differentially expressed genes between the BTK group ( $n = 30$ ) and weak responders ( $n = 59$ ) were identified and subjected to gene enrichment analysis using the MSigDB gene set collections *C6* and *Hallmark* (<http://software.broadinstitute.org/gsea/msigdb>). The top five enriched gene sets of the two gene set collections are shown together with the differentially expressed genes they contain. Differential gene expression analysis was performed with *DESeq2* using a loose threshold ( $p < 0.05$ ) [6]. Gene enrichment analysis was performed on the ranked gene lists using the Parametric Analysis of Gene Set Enrichment (PAGE) [9]. For each of the shown genes, we also computed the Pearson correlation coefficient with response to ibrutinib, within the BTK group samples; as well as the correlation test p-value. Genes for which  $p < 0.05$  and the absolute correlation coefficient  $> 0.5$  are marked with a + or - (depending on the sign of the coefficient). In this figure, the number of these genes is small and may potentially be explainable by multiple testing; a comparable analysis was performed for genes associated with the mTOR group in Figure S13, where the frequency of such genes is higher in Panel B.



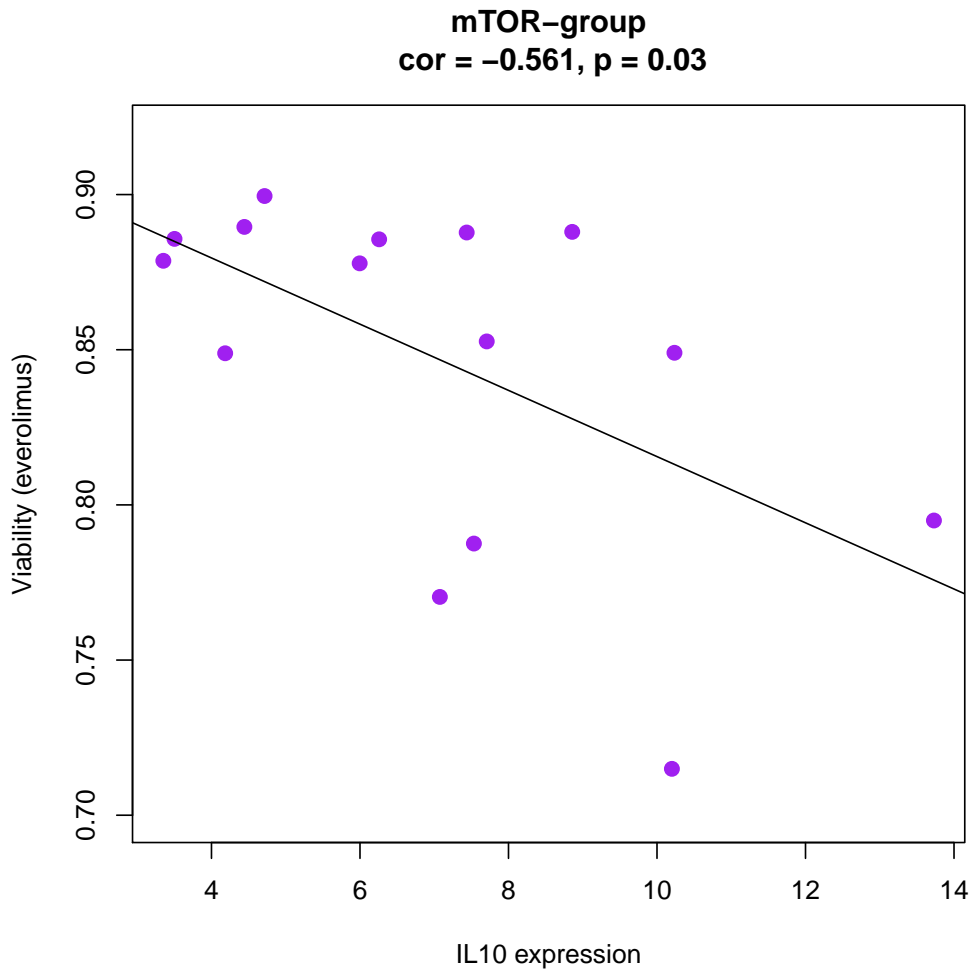

Figure S14: **Correlation of IL-10 mRNA expression and response to everolimus within the mTOR group.** Within the mTOR group ( $n = 15$ ) we correlated IL-10 mRNA expression with response to everolimus. Cases with a better response to everolimus had a higher expression of IL-10. IL-10 mRNA expression shows normalized read counts on a logarithmic (base 2) scale. The *DESeq2* package was used for library size normalization and variance stabilizing transformation [6].

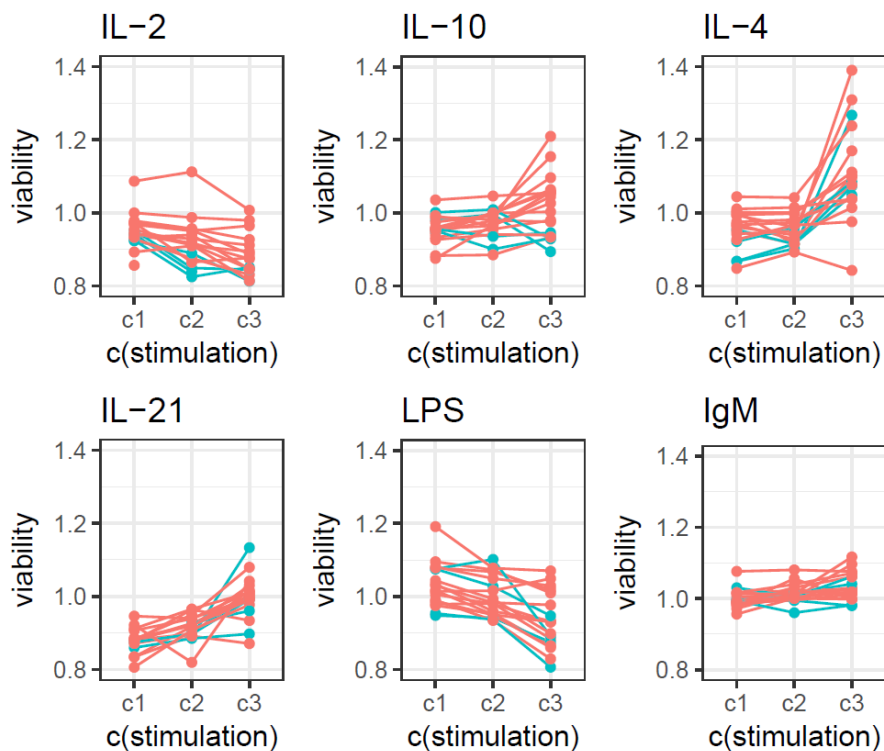

Figure S15: **Response to cytokines in CLL.**

18 CLL patient samples were exposed to IL-2, IL-10, IL-4, IL-21 ( $c_1=0.001$ ,  $c_2=0.1$ ,  $c_3=10$  ng/ $\mu$ l), LPS ( $c_1=1$ ,  $c_2=10$ ,  $c_3=100$  ng/ $\mu$ l) and IgM ( $c_1=10$  nM,  $c_2=1$ ,  $c_3 = 10$   $\mu$ M) for 48 hours. Viability was measured using a CellTitre Glo assay, and luminescence was normalized to unstimulated controls. The blue lines mark samples from the mTOR group. IL-10 had a pro-survival effect on the majority of samples (*t*-test,  $c_1$  vs.  $c_3$   $p=0.009$ ), but not on those in the mTOR group. IL-4 and IL-21 had pro-survival effects on most samples, including the mTOR group (*t*-test,  $c_1$  vs.  $c_3$   $p<0.001$ ).

A

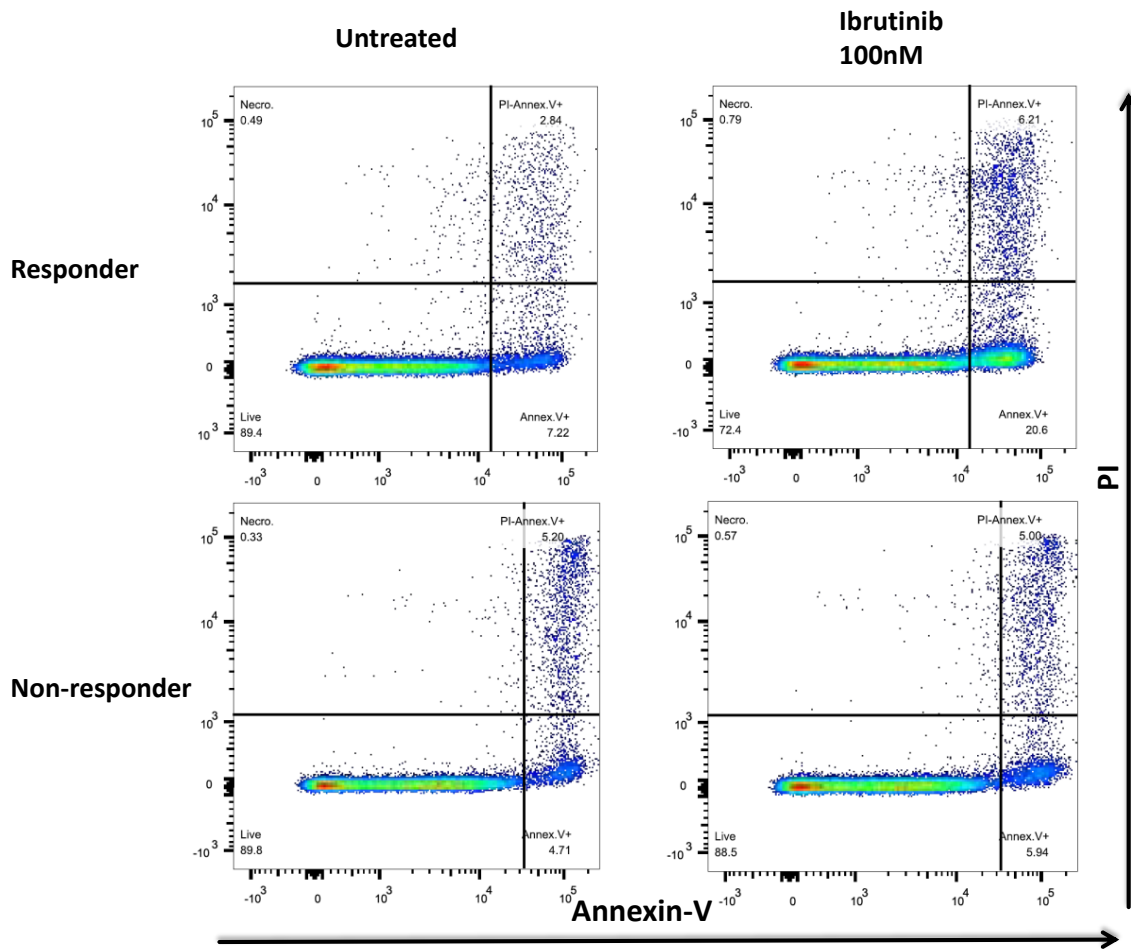

B

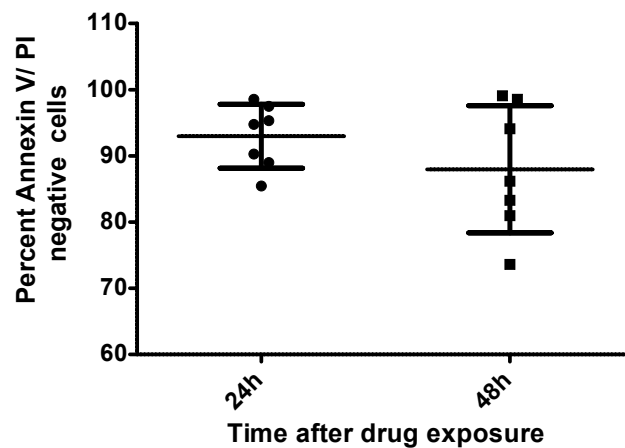

Figure S16: Ibrutinib induces apoptosis in primary CLL cells.

**Panel A** shows representative flow cytometry plots after drug exposure to 100 nM ibrutinib and for untreated controls. Apoptosis induction was measured by annexin-V staining, and cell death was quantified by propidium iodide (PI) staining.

**Panel B** summarizes the quantification of viable, i.e., annexin-V and PI negative, cells after 24 h and 48 h drug exposure. These results are in agreement with the results based on the ATP-based (cellTiter Glo) viability measurements.

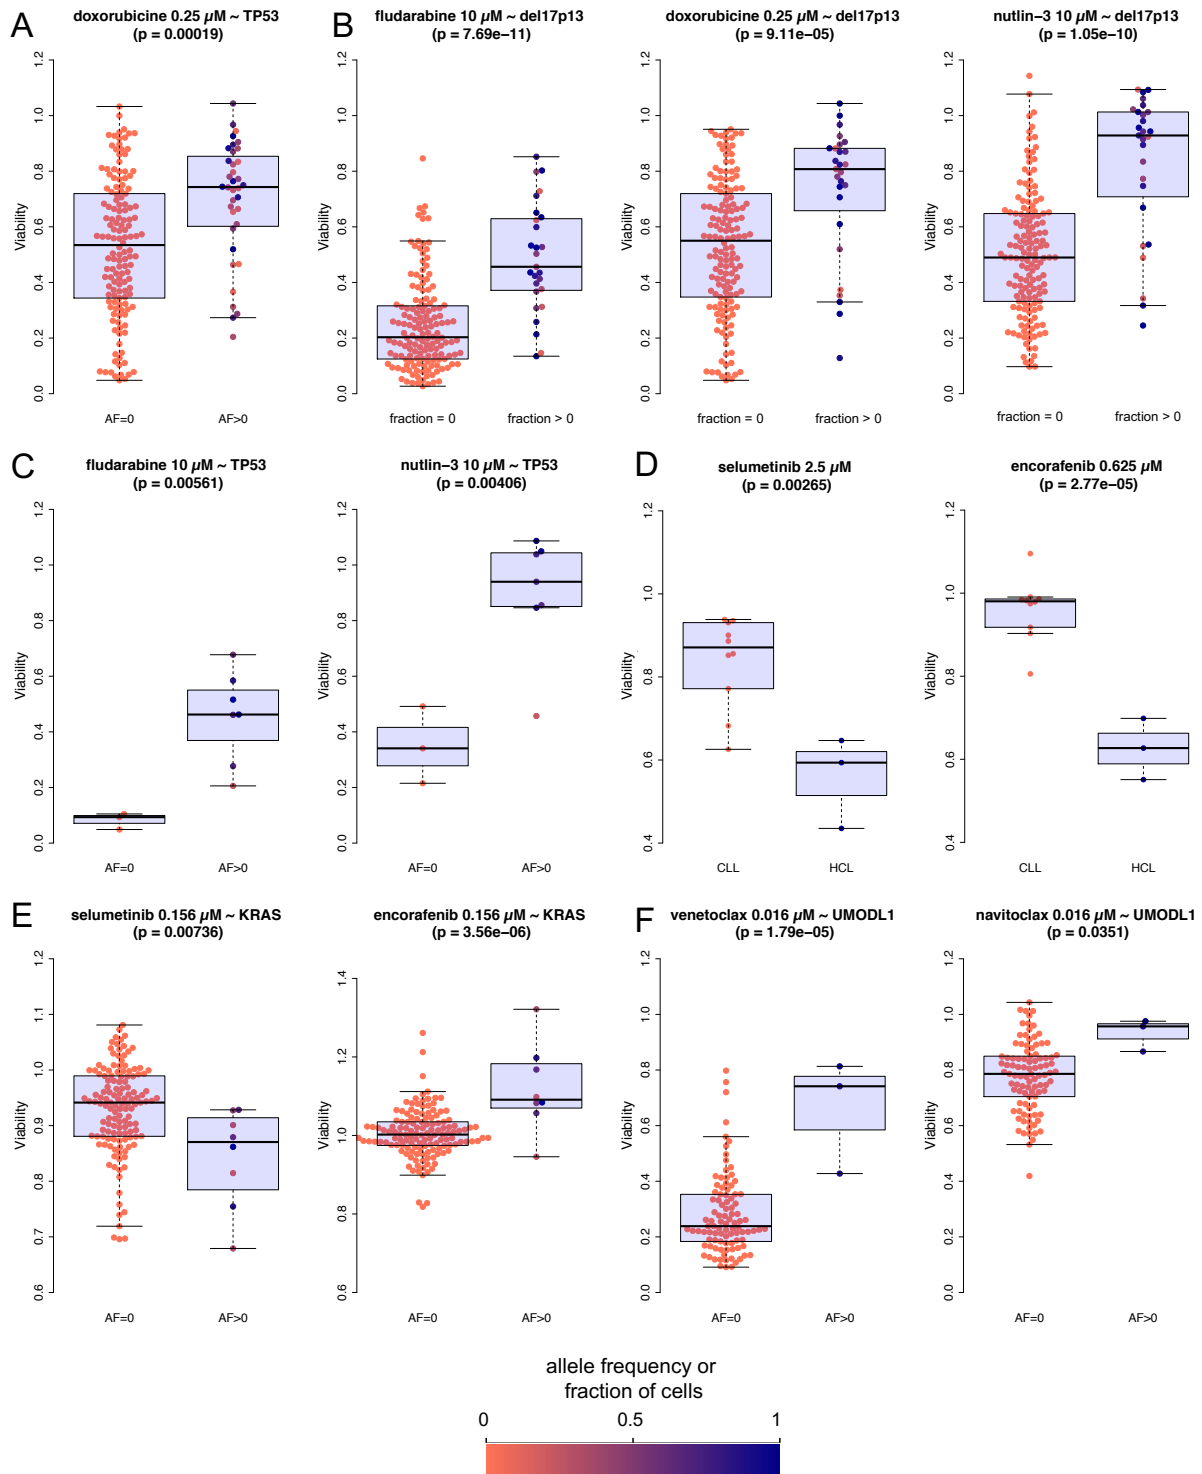

Figure S17: **Effect of mutations on drug response.** Exemplary beeswarm plots for associations between drugs and gene mutations or structural variants are shown. p-values were calculated with two-sided *t*-tests. Observed allele frequency (AF), a measure of clonality of the mutation, or fractions of cells are shown using the color code. Panels **A**, **B**, **E**, **F** show CLL samples, **C** mantle cell lymphoma (MCL), **D** CLL (n=10) and hairy cell leukemia (HCL, n=3) with BRAF mutation are shown.

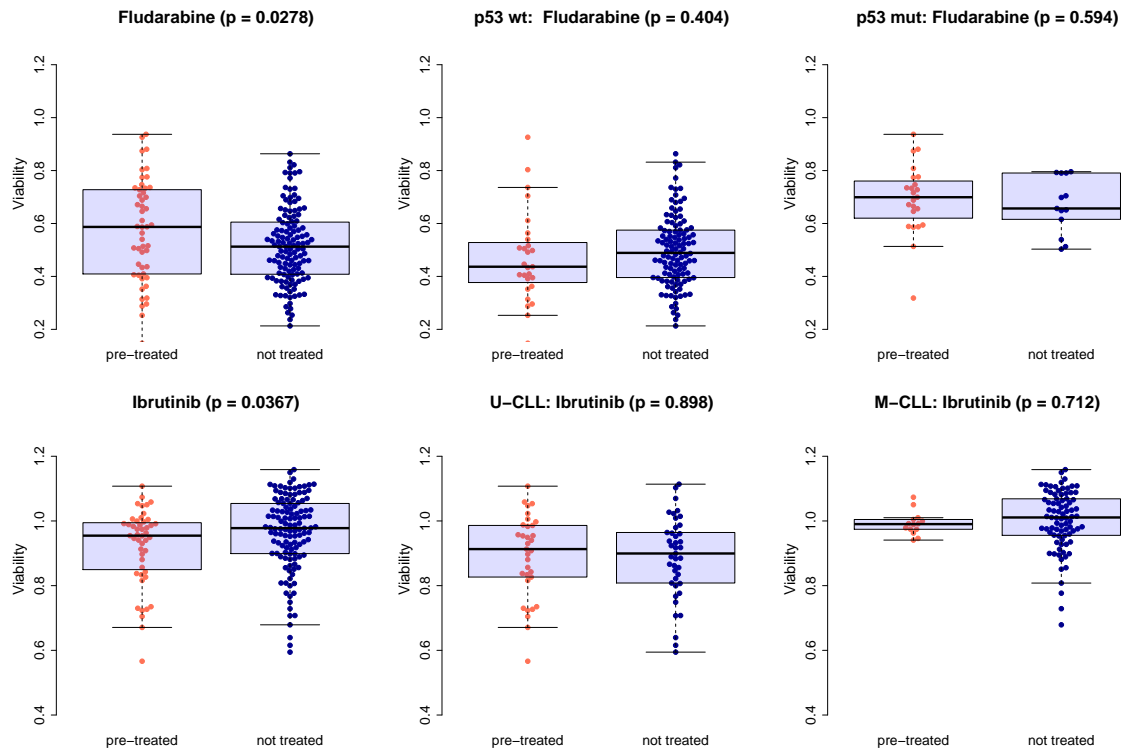

Figure S18: **Drug response in CLL stratified by pretreatment.**

Drug response in CLL stratified by pretreatment, *TP53* and IGHV status (Student's *t*-test). While pretreatment is associated with decreased response to fludarabine and increased response to ibrutinib, these apparent associations are driven by underlying causal associations with high risk genetics: *TP53* for fludarabine, IGHV mutation status for ibrutinib. After stratification into these genetically defined subgroups, there is no association with pretreatment status.



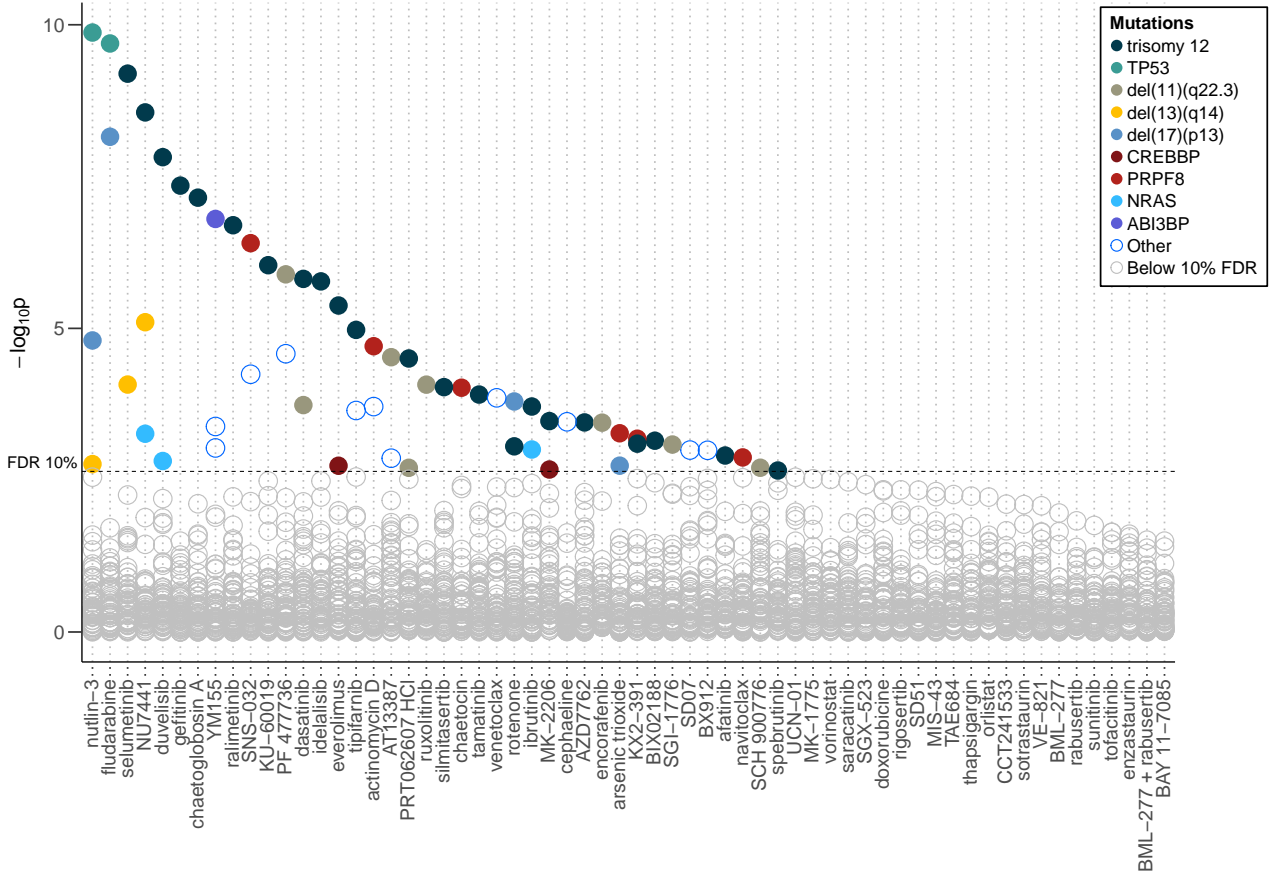

Figure S19: Associations of drug sensitivities with gene mutations and structural aberrations in CLL.

Each point represents a test for a drug-gene interaction. The drug is indicated by the points' position on the  $x$ -axis, the mutation by the color key (significant associations only). The  $y$ -axis shows the test  $p$ -values on a logarithmic scale. A simple two-group ANOVA was performed (as in figure 9 of the main text) but in contrast to the analysis for main figure 9 we additionally accounted for pretreatment status by including it as a second covariate. Multiple testing adjustment for FDR control was achieved by applying the method of Benjamini and Hochberg to all test  $p$ -values. For this analysis, the viability measurements for different drug concentrations were aggregated using Tukey's median polish method.

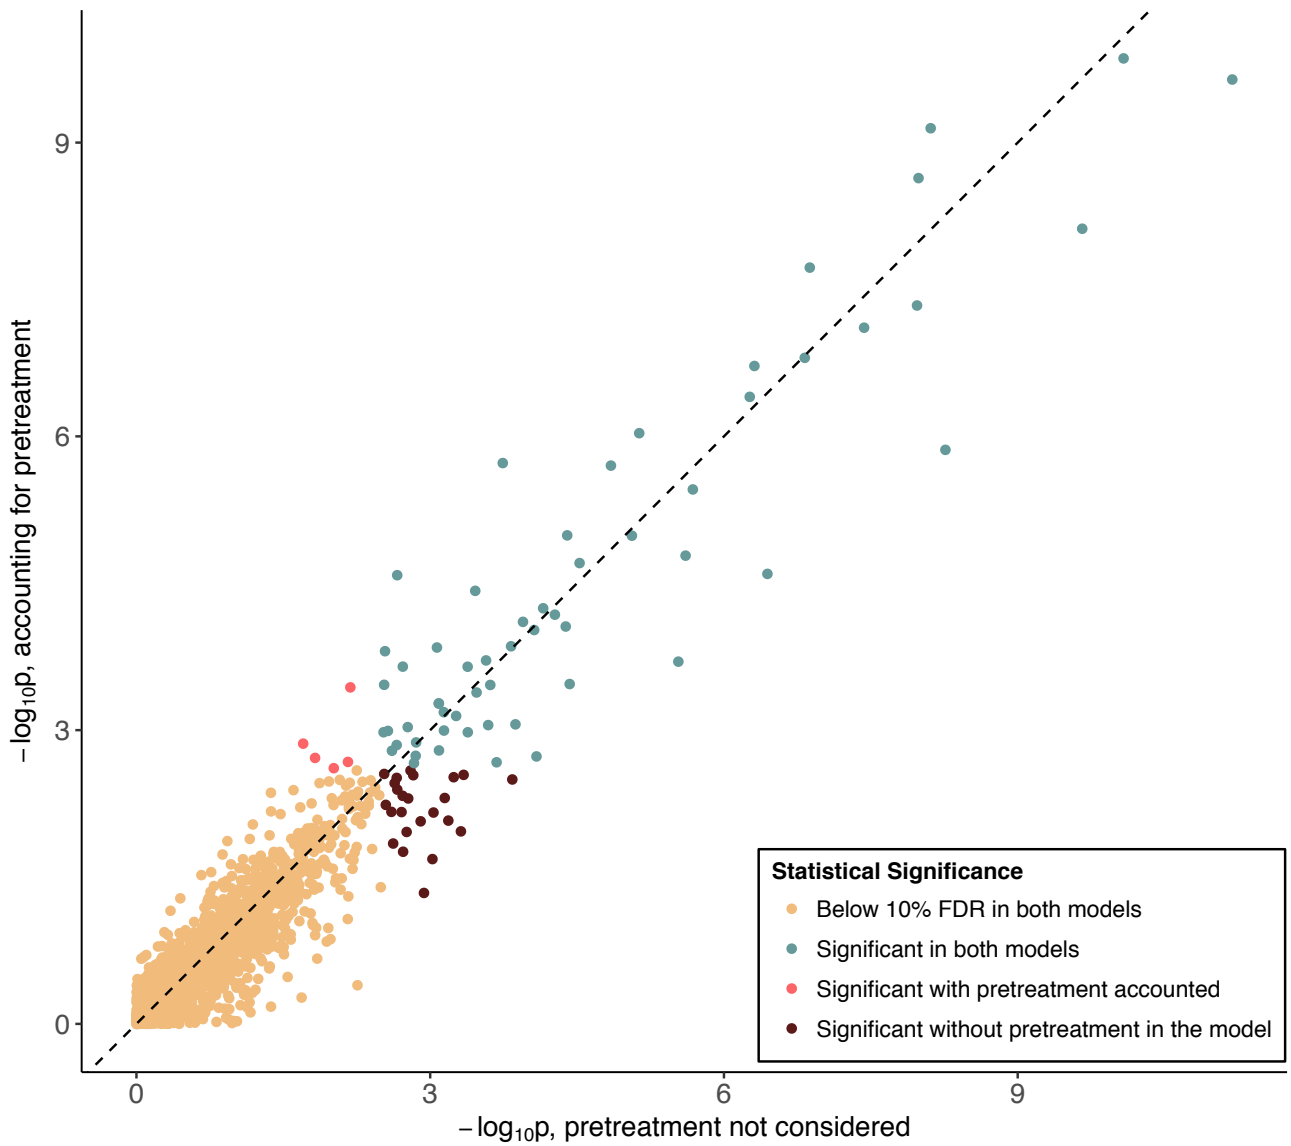

Figure S20: **Impact of pretreatment on associations of drug sensitivities with gene mutations.** We compared  $p$ -values between the models described in supplementary S19 and main figure 9. A scatter plot of this comparison in terms of the resulting association test  $p$ -values is shown. The scatter plot indicates that the two analyses are highly concordant.

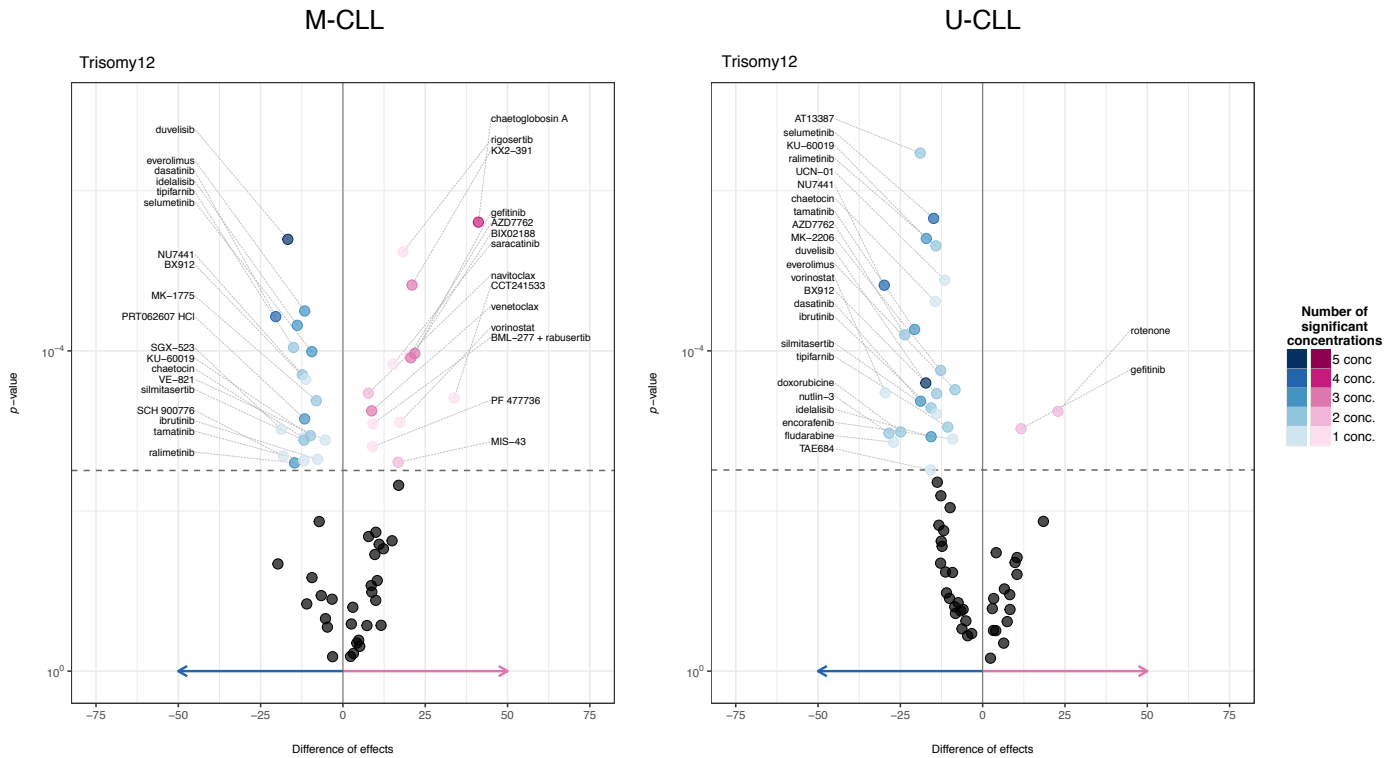

**Figure S21: Drug response associated with trisomy 12 within U-CLL and M-CLL.**

The volcano plots show drug response differences between CLL patient samples with and without trisomy 12 as in Figure 10b of the main text but here separately for M-CLL (left;  $n = 92$ : 15 and 77 with and without trisomy 12, respectively) and U-CLL (right,  $n = 69$ : 11 and 58 with and without trisomy 12, respectively). The p-values ( $y$ -axis) were obtained from Student  $t$ -tests. The Benjamini-Hochberg procedure for multiple testing was applied to the p-values, and the dashed horizontal line corresponds to a false discovery rate of 10%. For each drug, several drug concentrations were tested, and we show the maximum difference in viability effect between the two tested groups ( $x$ -axis).

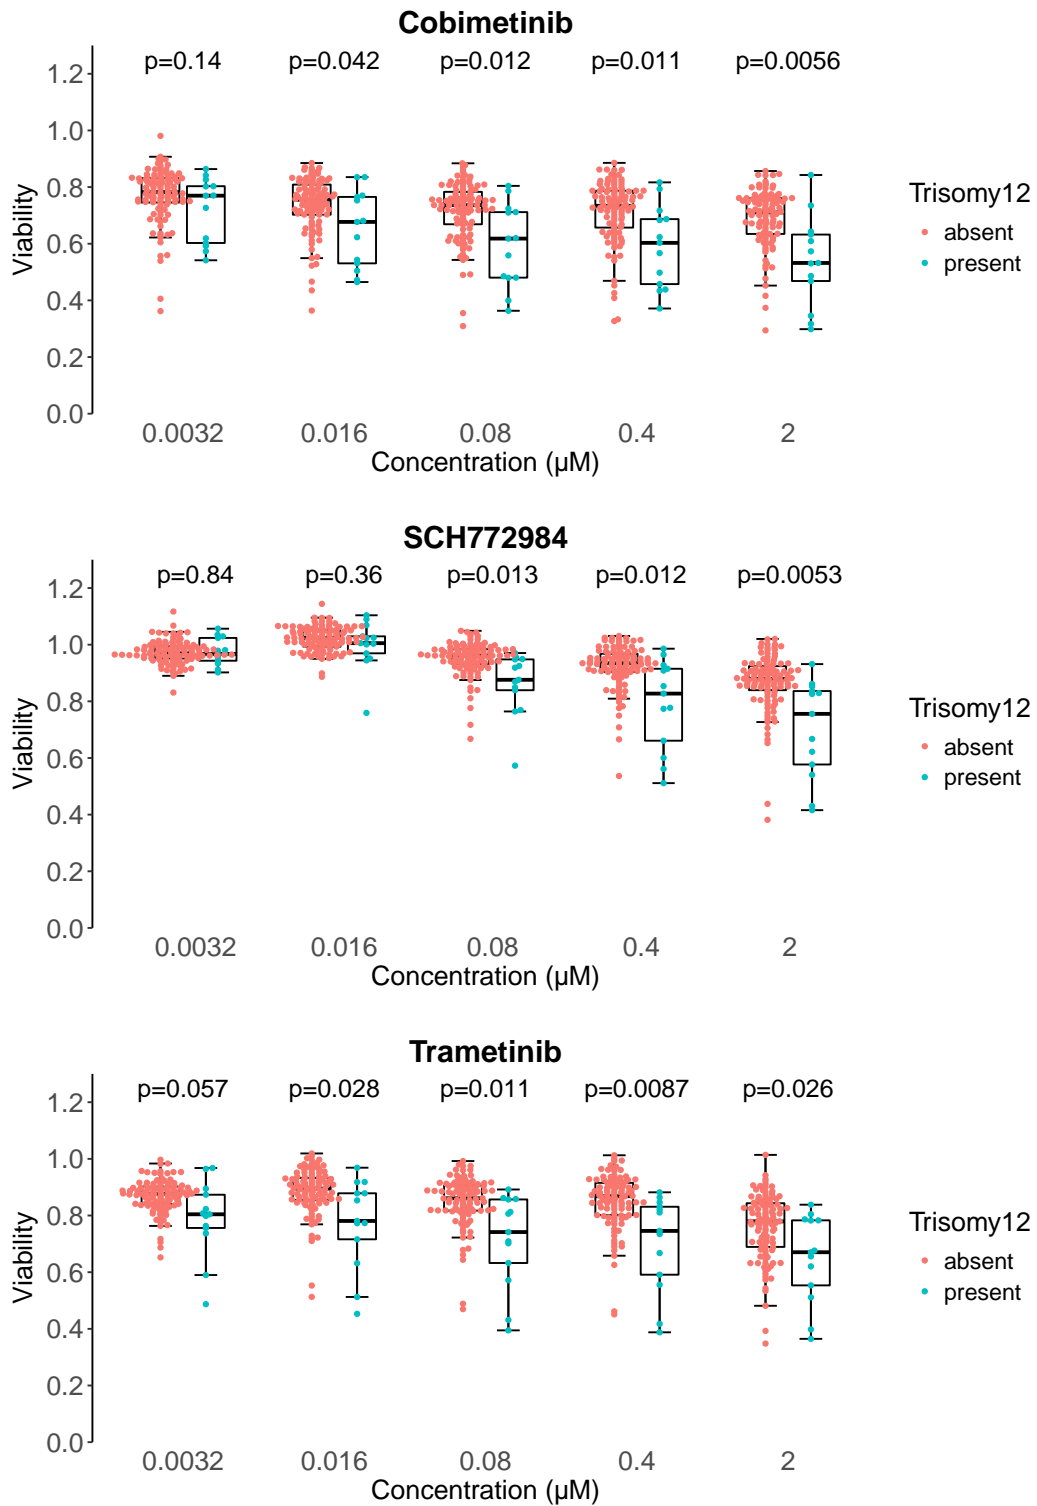

Figure S22: **Drug response associated with trisomy 12.**

The beeswarm plots show drug responses to MEK inhibitors (cobimetinib and trametinib) and ERK inhibitor SCH772984 at five different concentrations stratified by trisomy 12 status ( $n = 106$  without trisomy 12 and  $n = 13$  with trisomy 12; Student's  $t$ -test). ERK and MEK inhibition were more effective in trisomy 12 samples.

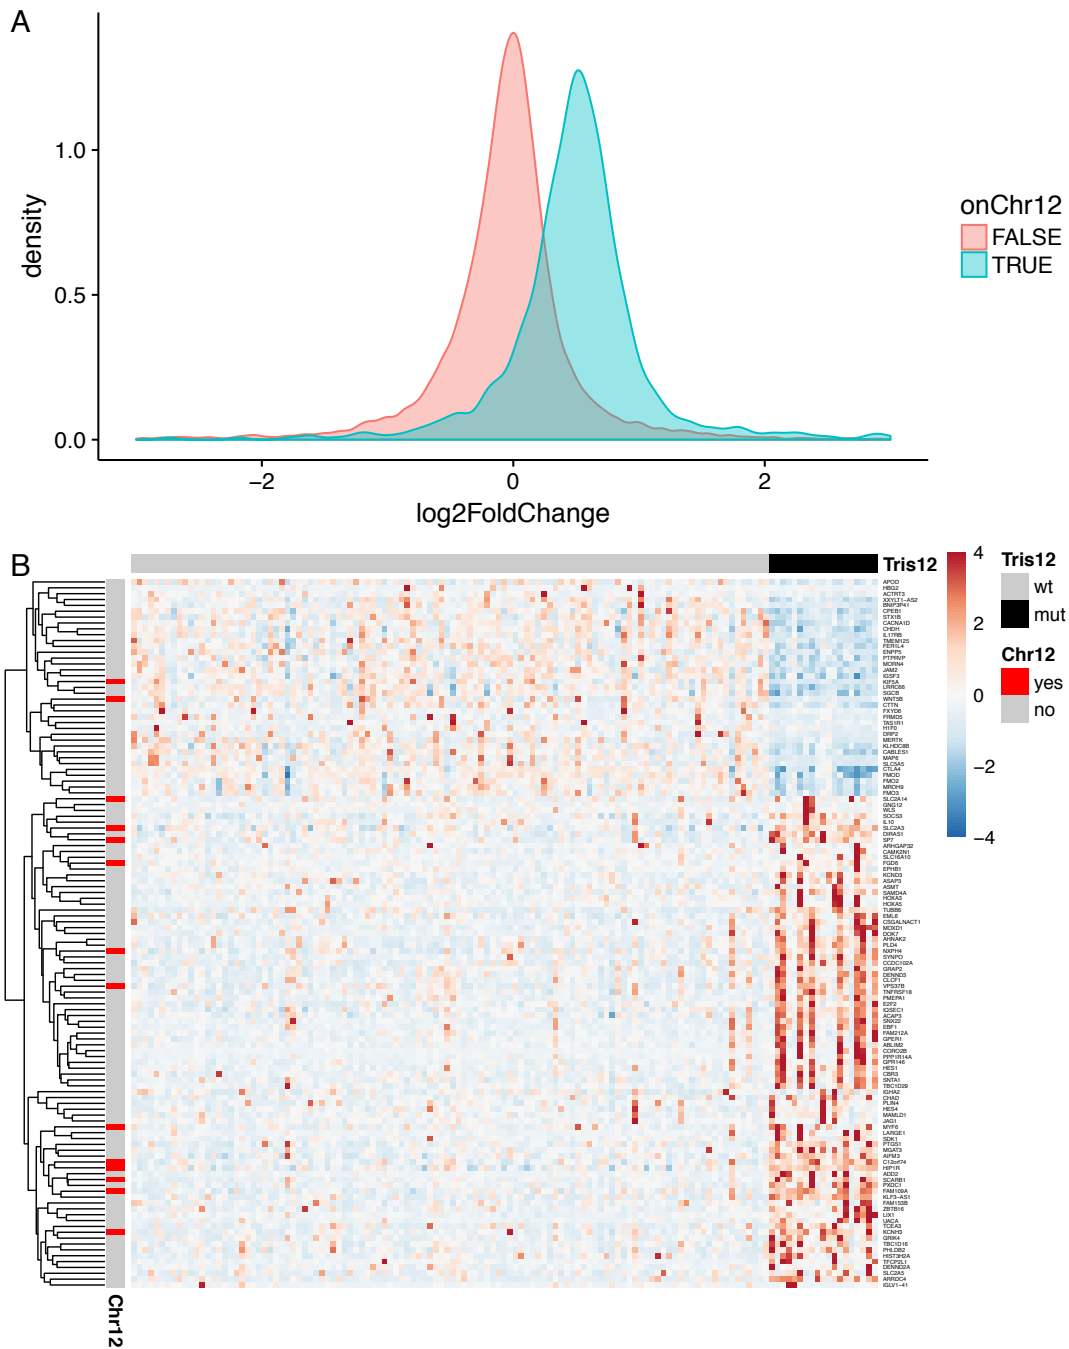

Figure S23: **Gene expression associated with trisomy 12.**

(A) Distributions of the  $\log_2$ -fold change between samples with ( $n = 19$ ) and without ( $n = 112$ ) trisomy 12, shown separately for the genes on chromosome 12 (blue) and on other chromosomes (red). The two distributions are shifted with respect to each other by an amount that is consistent with  $\log_2(3/2) \approx 0.58$  and thus with gene dosage effects. (B) The heatmap shows row-centered and -scaled gene expression values for differentially expressed genes between patients with and without trisomy 12, based on RNA-Seq data. Red indicates higher expression while blue indicates lower expression. Analysis was performed with *DESeq2* (FDR=10% and absolute  $\log_2$ -fold change  $> 1.5$ ) [6].

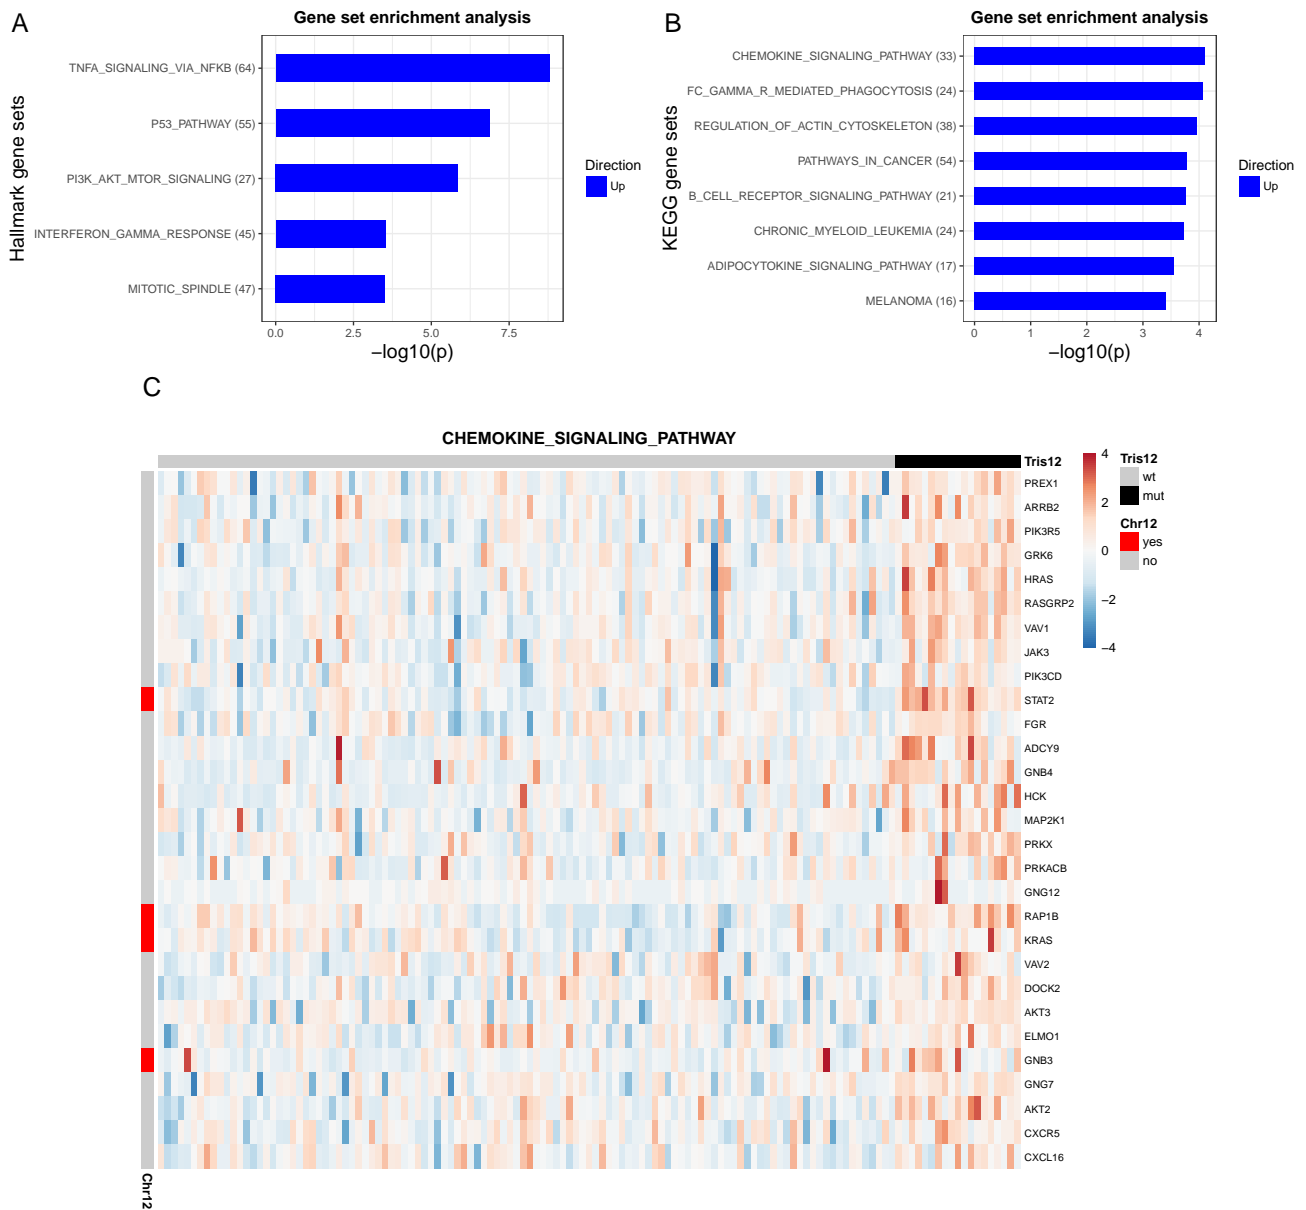

Figure S24: **Gene set enrichment analysis for trisomy 12.**

Differentially expressed genes between patients with ( $n = 19$ ) and without ( $n = 112$ ) trisomy 12 (raw  $p < 0.05$ ) were subjected to a gene enrichment analysis using the Parametric Analysis of Gene Set Enrichment (PAGE) [9]. Panel A shows the result from screening the Hallmark gene sets from MSigDB (<http://software.broadinstitute.org/gsea/msigdb>), Panel B those for KEGG (<http://www.genome.jp/kegg/pathway.html>). Shown are the top enriched gene sets, corresponding to a threshold of 1% FDR. **(A)** In line with increased activity of mTOR and PI3K inhibitors in trisomy 12 patients, PI3K-AKT-mTOR associated genes were significantly enriched. **(B)** PAGE identified chemokine signaling, regulation of actin cytoskeleton and BCR signaling to be significantly enriched. **(C)** The heatmap shows the row-centered and -scaled gene expression values (from RNA-seq) for the genes annotated by KEGG to the chemokine signaling pathway and differentially expressed between patients with and without trisomy12 (FDR=10%).

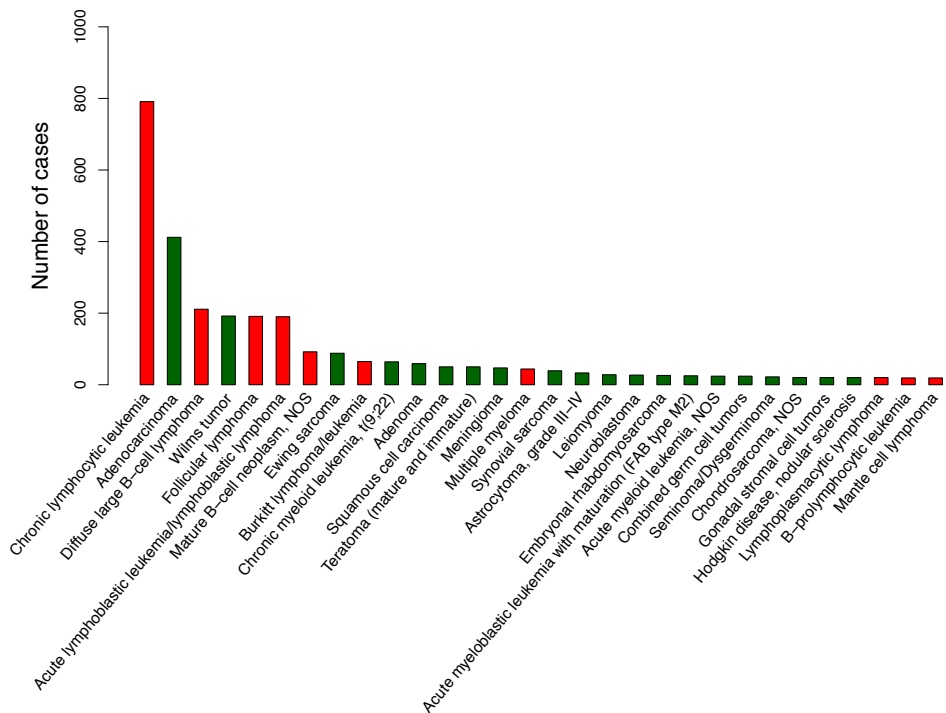

Figure S25: **Prevalence of trisomy 12 across different malignancies.**

The Mitelman Database (Mitelman F, Johansson B and Mertens F (Eds.), <http://cgap.nci.nih.gov/Chromosomes/Mitelman>) was queried for trisomy 12. Abundance of cases with trisomy 12 reported to the Mitelman database are shown. B-cell malignancies are highlighted in red.

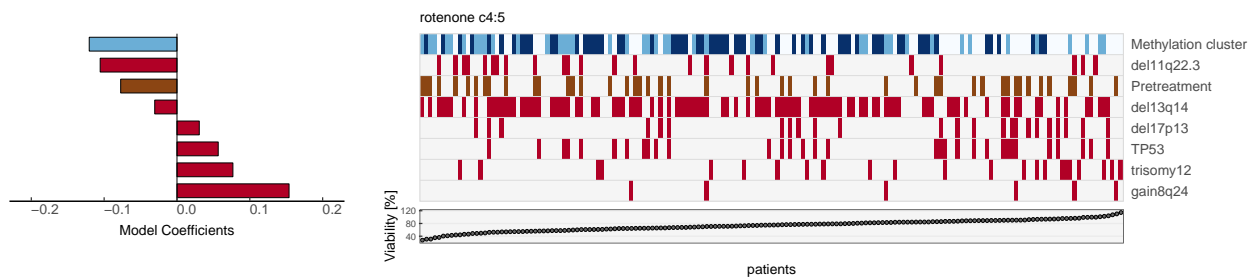

Figure S26: **Lasso model for rotenone.**

The representation and analysis is analogous to Figure 12 of the main text

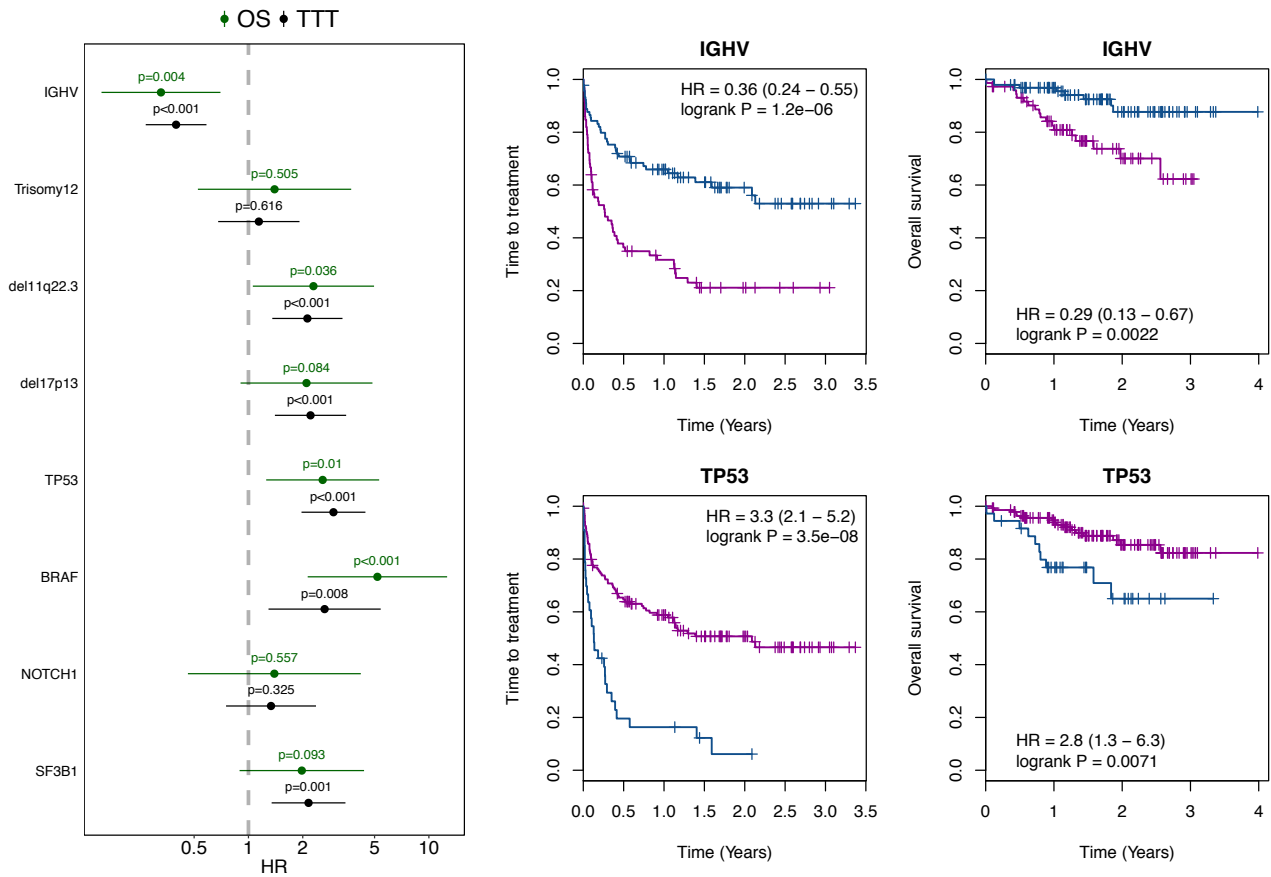

Figure S27: **Impact of genetic factors on survival.**

The **left panel** shows a forest plot for the impact of mutations and CNVs on time to treatment and overall survival. Hazard ratios (HR) were calculated for presence vs. absence of the genetic feature. The **right panels** show exemplary Kaplan-Meier plots for IGHV status and *TP53* mutation status. For the IGHV plots, the blue line represents patients with mutated IGHV locus ( $\leq 98\%$  homology) and purple unmutated IGHV locus. For the *TP53* plots, the blue line represents patients with a *TP53* mutation, the purple line patients with no *TP53* mutation. The same Kaplan Meier plot for the impact of *TP53* mutations on OS is also shown in Figure 13b.



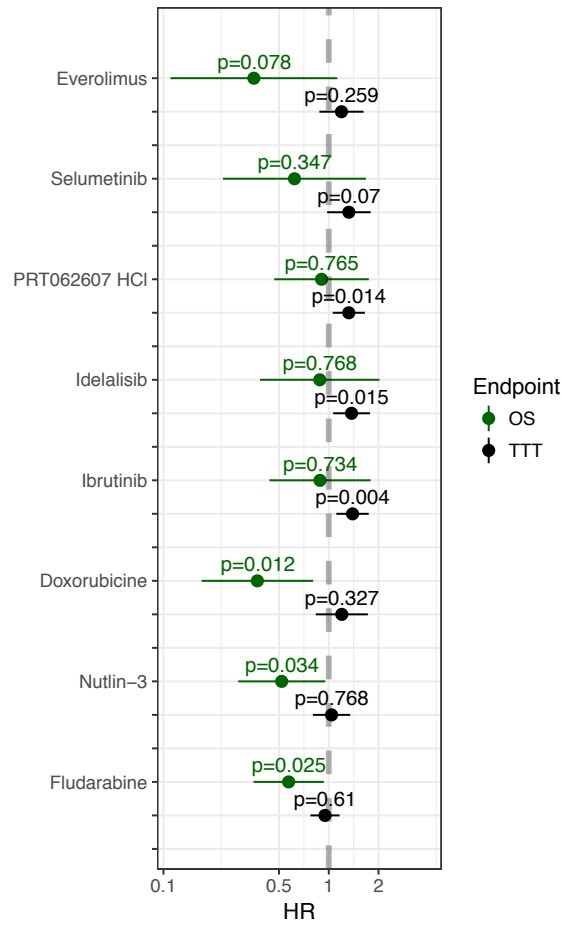

Figure S28: **Impact of drug response on survival in untreated patients.**

The plot is analogous to to figure 13a of the main text, but for this analysis only patients who were untreated were used.

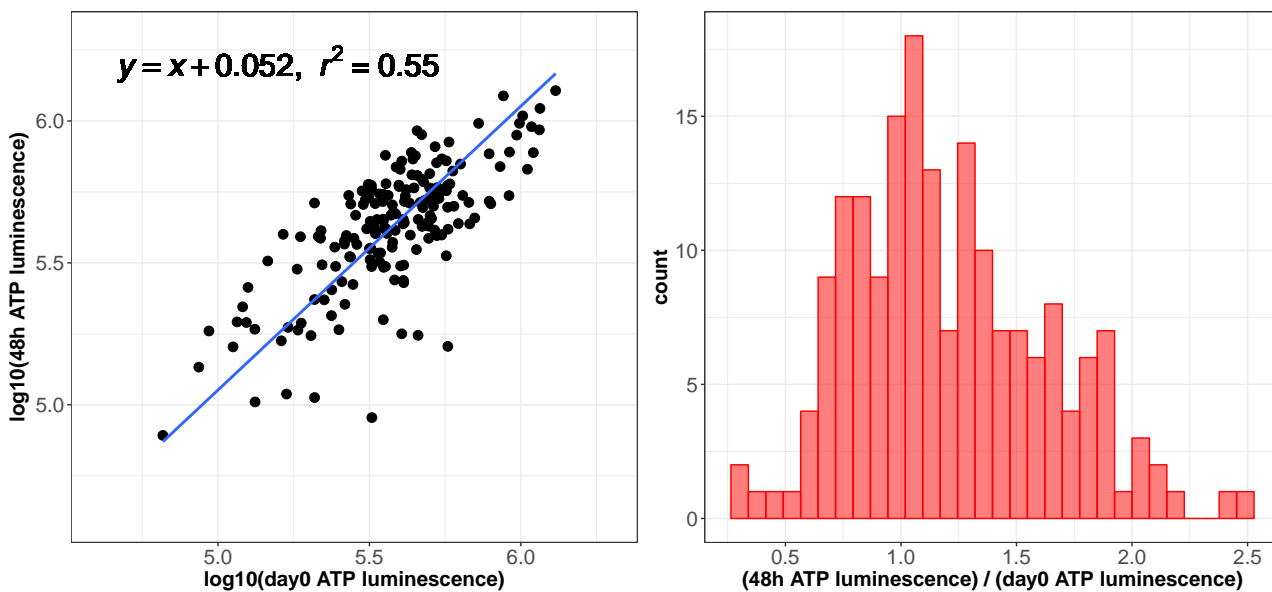

Figure S29: **ATP luminescence of DMSO controls at the beginning and after 48 h of incubation.** The scatterplot on the left shows the ATP luminescence of patient samples without drug treatment (negative controls) at the start of the incubation time (day0) and after 48 hours of culture. The majority of the samples show comparable levels of luminescence at both time points, indicating that viability did not generally decrease in this short-term culture assay. The regression line has an intercept of +0.052, which indicates that on average there is even a moderate increase (13%, since  $10^{0.052} \approx 1.13$ ) of the ATP luminescence during the 48 hours of culture, perhaps due to recovery from freezing stress. The histogram on the right shows ratios of ATP counts between the time points.

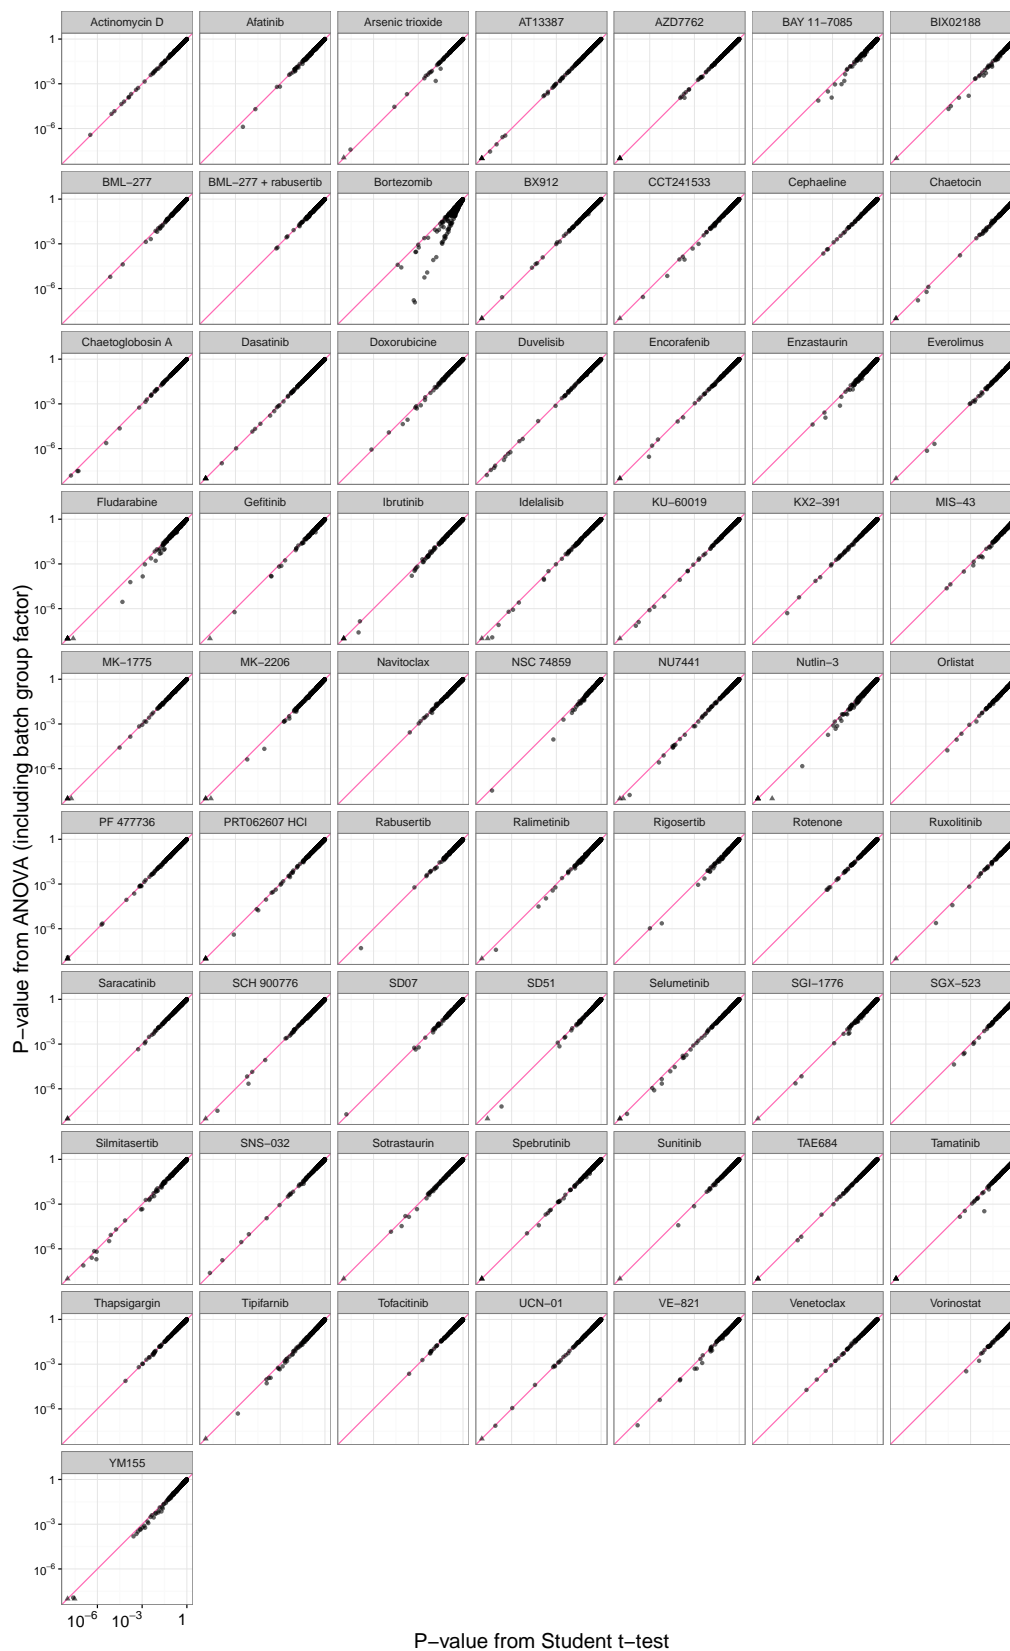

Figure S30: **Assessment of batch effects.**

To assess the potential impact of batch effects associated with different stages of the main screening campaigns, we compared p-values for associations between drug responses and genetic features computed in two different ways: two-way ANOVA with screening time point batches as a blocking factor ( $y$ -axis) and Student's  $t$ -test, which does not account for batch groups ( $x$ -axis). p-values below  $10^{-8}$  in at least one of the two analyses are shown with triangular symbols. The results show good agreement for all drugs except for bortezomib.

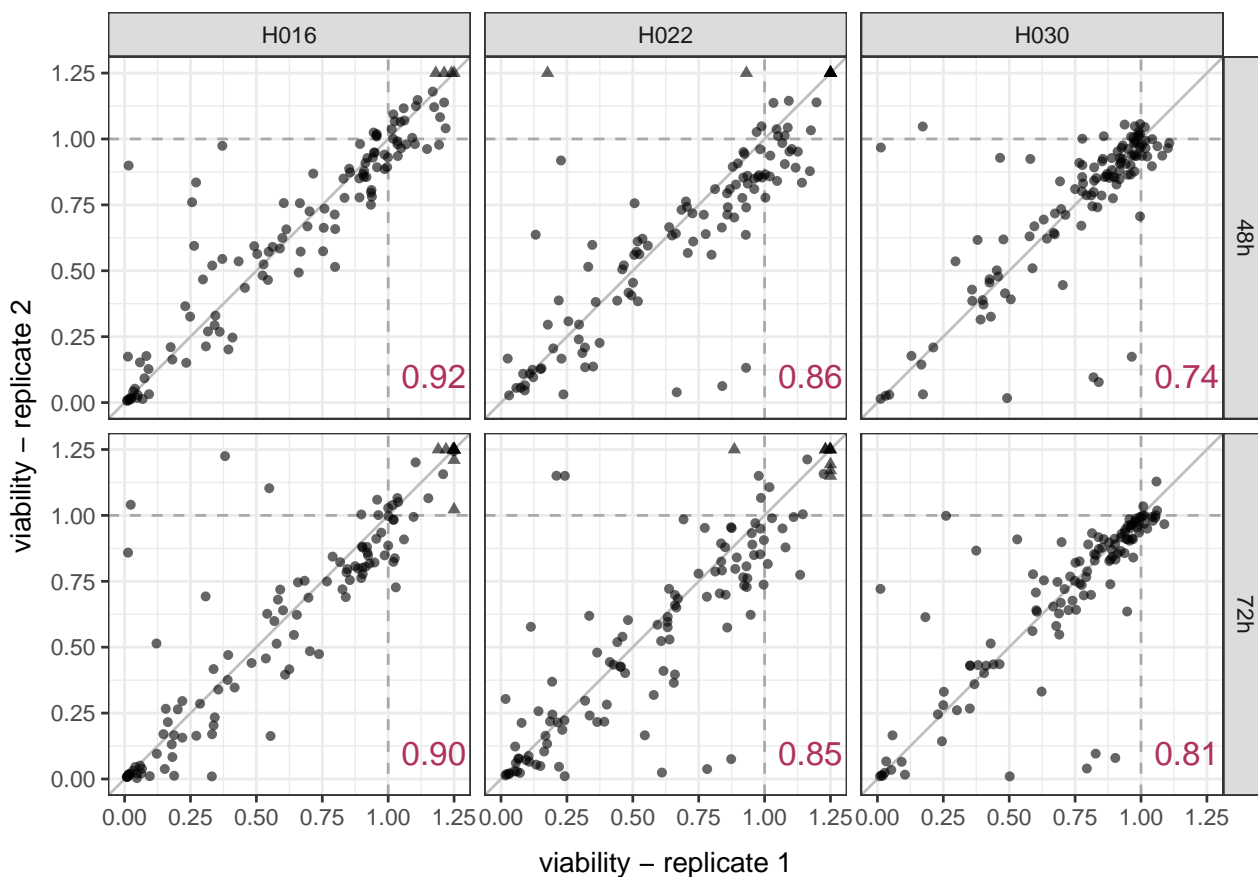

Figure S31: **Reproducibility of drug response measurements.**

The scatter plots show comparisons of drug response measurements in three patient samples that were repeatedly assayed at two different time points. Repeated measurements were performed for 48 and 72 h incubation time. Pearson correlation coefficients for measurements are shown within each plot. Triangles indicate data points outside the plotting range.

## 6 Supplementary tables

Table S1: **Drugs.** Drugs included in the drug screen.

| Drug ID | Compound         | Main targets                                                | Distributor        |
|---------|------------------|-------------------------------------------------------------|--------------------|
| D_001   | navitoclax       | BCL2, BCL-XL, BCL-W                                         | Selleck Chemicals  |
| D_002   | ibrutinib        | BTK                                                         | Selleck Chemicals  |
| D_003   | idelalisib       | PI3K delta                                                  | Selleck Chemicals  |
| D_004   | SNS-032          | CDK2/7/9                                                    | Selleck Chemicals  |
| D_006   | fludarabine      | Purine analogue                                             | Selleck Chemicals  |
| D_007   | vorinostat       | HDAC I/IIa/IIb/IV                                           | Selleck Chemicals  |
| D_008   | bortezomib       | Proteasome                                                  | Selleck Chemicals  |
| D_010   | nutlin-3         | MDM2                                                        | Selleck Chemicals  |
| D_011   | enzastaurin      | PKC                                                         | Selleck Chemicals  |
| D_012   | selumetinib      | MEK1/2                                                      | Selleck Chemicals  |
| D_013   | afatinib         | EGFR, ERBB2                                                 | Selleck Chemicals  |
| D_015   | MK-1775          | WEE1                                                        | Selleck Chemicals  |
| D_017   | AT13387          | HSP90                                                       | Selleck Chemicals  |
| D_020   | AZD7762          | CHK1/2                                                      | Selleck Chemicals  |
| D_021   | rigosertib       | PLK                                                         | Selleck Chemicals  |
| D_023   | ralimetinib      | p38 MAPK                                                    | Selleck Chemicals  |
| D_024   | SGI-1776         | PIM                                                         | Selleck Chemicals  |
| D_025   | NSC 74859        | STAT                                                        | Selleck Chemicals  |
| D_029   | TAE684           | ALK                                                         | Selleck Chemicals  |
| D_030   | MK-2206          | AKT1/2 (PKB)                                                | Selleck Chemicals  |
| D_032   | NU7441           | DNAPK                                                       | Selleck Chemicals  |
| D_033   | tipifarnib       | Farnesyltransferase (FNTA)                                  | Selleck Chemicals  |
| D_034   | chaetocin        | Lysine-specific histone methyltransferase                   | Sigma-Aldrich      |
| D_035   | saracatinib      | SRC, ABL1                                                   | Selleck Chemicals  |
| D_036   | tamatinib        | SYK                                                         | Selleck Chemicals  |
| D_039   | thapsigargin     | Sarco/endoplasmic reticulum Ca <sup>2+</sup> ATPase (SERCA) | Enzo Life Sciences |
| D_040   | YM155            | Survivin                                                    | Selleck Chemicals  |
| D_041   | BAY 11-7085      | NFkB                                                        | Enzo Life Sciences |
| D_043   | SGX-523          | MET                                                         | Selleck Chemicals  |
| D_045   | KU-60019         | ATM                                                         | Selleck Chemicals  |
| D_048   | orlistat         | LPL                                                         | Cayman Chemicals   |
| D_049   | chaetoglobosin A | Actin                                                       | Enzo Life Sciences |
| D_050   | dasatinib        | ABL1, KIT, LYN, PDGFRA, PDGFRB, SRC                         | Selleck Chemicals  |
| D_053   | sunitinib        | VEGFR, PDGFRA/B, FLT3, KIT                                  | Selleck Chemicals  |
| D_054   | gefitinib        | EGFR                                                        | Selleck Chemicals  |
| D_056   | actinomycin D    | RNA synthesis                                               | Sigma-Aldrich      |
| D_060   | cephaeline       | 40S ribosomal subunit                                       | Sigma-Aldrich      |
| D_063   | everolimus       | mTOR                                                        | Selleck Chemicals  |
| D_066   | arsenic trioxide |                                                             | Sigma-Aldrich      |
| D_067   | rotenone         | Electron transport chain in mitochondria                    | Sigma-Aldrich      |
| D_071   | KX2-391          | SRC                                                         | Selleck Chemicals  |
| D_074   | VE-821           | ATR                                                         | Selleck Chemicals  |
| D_075   | rabusertib       | CHK1                                                        | Selleck Chemicals  |
| D_077   | SCH 900776       | CHK1, CDK2                                                  | Selleck Chemicals  |
| D_078   | PF 477736        | CHK1, CHK2                                                  | Selleck Chemicals  |
| D_079   | spebrutinib      | BTK                                                         | Celgene            |
| D_081   | venetoclax       | BCL2                                                        | Selleck Chemicals  |
| D_082   | duvelisib        | PI3K gamma, PI3K delta                                      | Selleck Chemicals  |
| D_083   | encorafenib      | BRAF                                                        | Novartis           |
| D_084   | ruxolitinib      | JAK1/2/3                                                    | Selleck Chemicals  |

|       |                      |                                        |                      |
|-------|----------------------|----------------------------------------|----------------------|
| D_127 | SD07                 | ROS                                    | Academic cooperation |
| D_141 | SD51                 | ROS                                    | Academic cooperation |
| D_149 | MIS-43               | ROS                                    | Academic cooperation |
| D_159 | doxorubicine         | DNA intercalation,<br>Topoisomerase II | Sigma-Aldrich        |
| D_162 | BML-277              | CHK2                                   | Sigma-Aldrich        |
| D_163 | CCT241533            | CHK2                                   | MedChem Express      |
| D_164 | BX912                | PDK1                                   | Selleck Chemicals    |
| D_165 | silmitasertib        | CK2                                    | Selleck Chemicals    |
| D_166 | PRT062607 HCl        | SYK                                    | Selleck Chemicals    |
| D_167 | UCN-01               | PKC, MK2, CHK1                         | Sigma-Aldrich        |
| D_168 | sotrastaurin         | PKC                                    | Selleck Chemicals    |
| D_169 | tofacitinib          | JAK3                                   | Selleck Chemicals    |
| D_172 | BIX02188             | MEK5                                   | Selleck Chemicals    |
| D_CHK | BML-277 + rabusertib |                                        |                      |

---

Table S2: **Drug concentrations.** Drug concentrations used in the drug screen.

| Drug ID | c1 [ $\mu$ M] | c2 [ $\mu$ M] | c3 [ $\mu$ M] | c4 [ $\mu$ M] | c5 [ $\mu$ M] |
|---------|---------------|---------------|---------------|---------------|---------------|
| D_001   | 1.000         | 0.250         | 0.063         | 0.016         | 0.004         |
| D_002   | 40.000        | 10.000        | 2.500         | 0.625         | 0.156         |
| D_003   | 40.000        | 10.000        | 2.500         | 0.625         | 0.156         |
| D_004   | 4.000         | 1.000         | 0.250         | 0.063         | 0.016         |
| D_006   | 40.000        | 10.000        | 2.500         | 0.625         | 0.156         |
| D_007   | 20.000        | 5.000         | 1.250         | 0.313         | 0.078         |
| D_008   | 20.000        | 5.000         | 1.250         | 0.313         | 0.078         |
| D_010   | 40.000        | 10.000        | 2.500         | 0.625         | 0.156         |
| D_011   | 40.000        | 10.000        | 2.500         | 0.625         | 0.156         |
| D_012   | 40.000        | 10.000        | 2.500         | 0.625         | 0.156         |
| D_013   | 15.000        | 5.000         | 1.667         | 0.556         | 0.185         |
| D_015   | 40.000        | 10.000        | 2.500         | 0.625         | 0.156         |
| D_017   | 10.000        | 2.500         | 0.625         | 0.156         | 0.039         |
| D_020   | 40.000        | 10.000        | 2.500         | 0.625         | 0.156         |
| D_021   | 40.000        | 10.000        | 2.500         | 0.625         | 0.156         |
| D_023   | 40.000        | 10.000        | 2.500         | 0.625         | 0.156         |
| D_024   | 40.000        | 10.000        | 2.500         | 0.625         | 0.156         |
| D_025   | 40.000        | 10.000        | 2.500         | 0.625         | 0.156         |
| D_029   | 40.000        | 10.000        | 2.500         | 0.625         | 0.156         |
| D_030   | 40.000        | 10.000        | 2.500         | 0.625         | 0.156         |
| D_032   | 40.000        | 10.000        | 2.500         | 0.625         | 0.156         |
| D_033   | 40.000        | 10.000        | 2.500         | 0.625         | 0.156         |
| D_034   | 2.000         | 0.500         | 0.125         | 0.031         | 0.008         |
| D_035   | 40.000        | 10.000        | 2.500         | 0.625         | 0.156         |
| D_036   | 40.000        | 10.000        | 2.500         | 0.625         | 0.156         |
| D_039   | 20.000        | 5.000         | 1.250         | 0.313         | 0.078         |
| D_040   | 2.000         | 0.500         | 0.125         | 0.031         | 0.008         |
| D_041   | 40.000        | 10.000        | 2.500         | 0.625         | 0.156         |
| D_043   | 40.000        | 10.000        | 2.500         | 0.625         | 0.156         |
| D_045   | 40.000        | 10.000        | 2.500         | 0.625         | 0.156         |
| D_048   | 40.000        | 10.000        | 2.500         | 0.625         | 0.156         |
| D_049   | 20.000        | 10.000        | 5.000         | 2.500         | 1.250         |
| D_050   | 40.000        | 10.000        | 2.500         | 0.625         | 0.156         |
| D_053   | 40.000        | 10.000        | 2.500         | 0.625         | 0.156         |
| D_054   | 40.000        | 10.000        | 2.500         | 0.625         | 0.156         |
| D_056   | 0.300         | 0.100         | 0.033         | 0.011         | 0.004         |
| D_060   | 4.000         | 1.000         | 0.250         | 0.063         | 0.016         |
| D_063   | 40.000        | 10.000        | 2.500         | 0.625         | 0.156         |
| D_066   | 8.000         | 4.000         | 2.000         | 1.000         | 0.500         |
| D_067   | 40.000        | 10.000        | 2.500         | 0.625         | 0.156         |
| D_071   | 40.000        | 10.000        | 2.500         | 0.625         | 0.156         |
| D_074   | 40.000        | 10.000        | 2.500         | 0.625         | 0.156         |
| D_075   | 40.000        | 10.000        | 2.500         | 0.625         | 0.156         |
| D_077   | 40.000        | 10.000        | 2.500         | 0.625         | 0.156         |
| D_078   | 40.000        | 10.000        | 2.500         | 0.625         | 0.156         |
| D_079   | 40.000        | 10.000        | 2.500         | 0.625         | 0.156         |
| D_081   | 1.000         | 0.250         | 0.063         | 0.016         | 0.004         |
| D_082   | 40.000        | 10.000        | 2.500         | 0.625         | 0.156         |
| D_083   | 40.000        | 10.000        | 2.500         | 0.625         | 0.156         |
| D_084   | 40.000        | 10.000        | 2.500         | 0.625         | 0.156         |
| D_127   | 30.000        | 10.000        | 3.333         | 1.111         | 0.370         |
| D_141   | 30.000        | 10.000        | 3.333         | 1.111         | 0.370         |
| D_149   | 30.000        | 10.000        | 3.333         | 1.111         | 0.370         |
| D_159   | 4.000         | 1.000         | 0.250         | 0.063         | 0.016         |
| D_162   | 40.000        | 10.000        | 2.500         | 0.625         | 0.156         |
| D_163   | 40.000        | 10.000        | 2.500         | 0.625         | 0.156         |
| D_164   | 40.000        | 10.000        | 2.500         | 0.625         | 0.156         |
| D_165   | 40.000        | 10.000        | 2.500         | 0.625         | 0.156         |

|       |        |        |       |       |       |
|-------|--------|--------|-------|-------|-------|
| D_166 | 40.000 | 10.000 | 2.500 | 0.625 | 0.156 |
| D_167 | 10.000 | 2.500  | 0.625 | 0.156 | 0.039 |
| D_168 | 40.000 | 10.000 | 2.500 | 0.625 | 0.156 |
| D_169 | 40.000 | 10.000 | 2.500 | 0.625 | 0.156 |
| D_172 | 40.000 | 10.000 | 2.500 | 0.625 | 0.156 |
| D_CHK | 10.000 | 2.500  | 0.625 | 0.156 | 0.039 |



Table S3: **Patient characteristics.** Characteristics of samples used in the drug screen (n.d. - no data available).

| No | Patient ID | Diagnosis | Age  | Sex    | IGHV status | Treated | Alive |
|----|------------|-----------|------|--------|-------------|---------|-------|
| 1  | H001       | hMNC      | n.d. | n.d.   | n.d.        | n.d.    | n.d.  |
| 2  | H002       | hMNC      | n.d. | n.d.   | n.d.        | n.d.    | n.d.  |
| 3  | H003       | hMNC      | n.d. | n.d.   | n.d.        | n.d.    | n.d.  |
| 4  | H005       | CLL       | 75   | male   | mutated     | yes     | yes   |
| 5  | H009       | B-PLL     | 57   | male   | unmutated   | yes     | yes   |
| 6  | H010       | CLL       | 73   | female | unmutated   | no      | yes   |
| 7  | H011       | CLL       | 73   | female | mutated     | no      | yes   |
| 8  | H012       | CLL       | 62   | female | unmutated   | yes     | no    |
| 9  | H013       | CLL       | 77   | male   | unmutated   | yes     | no    |
| 10 | H014       | CLL       | 86   | female | unmutated   | yes     | no    |
| 11 | H015       | CLL       | 62   | female | unmutated   | no      | yes   |
| 12 | H016       | CLL       | 55   | male   | mutated     | no      | yes   |
| 13 | H017       | CLL       | 56   | male   | unmutated   | no      | no    |
| 14 | H019       | CLL       | 70   | female | unmutated   | yes     | no    |
| 15 | H020       | CLL       | 64   | male   | mutated     | no      | yes   |
| 16 | H021       | CLL       | 50   | male   | mutated     | no      | yes   |
| 17 | H023       | CLL       | 71   | female | unmutated   | yes     | no    |
| 18 | H025       | T-PLL     | 73   | male   | n.d.        | yes     | no    |
| 19 | H026       | LPL       | 59   | male   | mutated     | no      | yes   |
| 20 | H027       | CLL       | 58   | male   | unmutated   | no      | yes   |
| 21 | H028       | CLL       | 73   | female | mutated     | no      | no    |
| 22 | H029       | CLL       | 75   | female | mutated     | yes     | yes   |
| 23 | H030       | CLL       | 53   | male   | unmutated   | no      | yes   |
| 24 | H031       | CLL       | 62   | female | mutated     | no      | yes   |
| 25 | H032       | CLL       | 67   | male   | unmutated   | yes     | no    |
| 26 | H033       | CLL       | 63   | female | mutated     | no      | yes   |
| 27 | H035       | CLL       | 79   | female | mutated     | yes     | yes   |
| 28 | H036       | CLL       | 75   | female | mutated     | no      | yes   |
| 29 | H037       | CLL       | 71   | male   | mutated     | no      | yes   |
| 30 | H038       | CLL       | 74   | male   | mutated     | no      | yes   |
| 31 | H039       | CLL       | 55   | female | mutated     | no      | yes   |
| 32 | H040       | CLL       | 84   | female | mutated     | no      | no    |
| 33 | H041       | CLL       | 76   | male   | mutated     | no      | yes   |
| 34 | H042       | CLL       | 72   | female | unmutated   | yes     | no    |
| 35 | H043       | CLL       | 44   | female | unmutated   | yes     | yes   |
| 36 | H044       | CLL       | 61   | male   | unmutated   | yes     | yes   |
| 37 | H045       | CLL       | 91   | male   | unmutated   | yes     | no    |
| 38 | H046       | CLL       | 88   | male   | mutated     | no      | yes   |
| 39 | H047       | CLL       | 69   | male   | unmutated   | yes     | no    |
| 40 | H048       | CLL       | 65   | female | unmutated   | yes     | yes   |
| 41 | H049       | CLL       | 58   | male   | mutated     | no      | yes   |
| 42 | H050       | CLL       | 63   | female | mutated     | no      | yes   |
| 43 | H051       | CLL       | 79   | female | unmutated   | yes     | no    |
| 44 | H053       | CLL       | 83   | female | mutated     | no      | yes   |
| 45 | H054       | CLL       | 50   | female | mutated     | no      | yes   |
| 46 | H055       | CLL       | 65   | male   | mutated     | no      | yes   |
| 47 | H056       | CLL       | 83   | male   | mutated     | no      | yes   |
| 48 | H057       | CLL       | 67   | male   | mutated     | no      | yes   |
| 49 | H058       | CLL       | 75   | female | mutated     | no      | no    |
| 50 | H059       | CLL       | 55   | male   | mutated     | no      | yes   |
| 51 | H060       | CLL       | 75   | male   | unmutated   | no      | yes   |
| 52 | H062       | CLL       | 53   | male   | mutated     | no      | yes   |
| 53 | H063       | CLL       | 49   | female | mutated     | no      | yes   |
| 54 | H064       | CLL       | 71   | male   | n.d.        | yes     | yes   |
| 55 | H065       | CLL       | 77   | female | unmutated   | yes     | no    |
| 56 | H066       | CLL       | 47   | male   | unmutated   | yes     | no    |
| 57 | H067       | CLL       | 77   | female | mutated     | no      | yes   |
| 58 | H069       | CLL       | 77   | female | unmutated   | yes     | no    |
| 59 | H070       | CLL       | 71   | male   | n.d.        | no      | yes   |
| 60 | H071       | FL        | 60   | male   | mutated     | no      | yes   |
| 61 | H072       | CLL       | 58   | male   | unmutated   | no      | yes   |
| 62 | H073       | CLL       | 65   | male   | mutated     | yes     | yes   |

|     |      |        |      |        |           |      |      |
|-----|------|--------|------|--------|-----------|------|------|
| 63  | H076 | MCL    | 67   | male   | mutated   | no   | yes  |
| 64  | H077 | CLL    | 70   | female | unmutated | no   | yes  |
| 65  | H078 | CLL    | 68   | male   | unmutated | yes  | yes  |
| 66  | H079 | CLL    | 48   | male   | unmutated | no   | yes  |
| 67  | H080 | CLL    | 82   | male   | unmutated | yes  | yes  |
| 68  | H081 | CLL    | 64   | female | mutated   | no   | yes  |
| 69  | H082 | CLL    | 82   | male   | mutated   | no   | yes  |
| 70  | H083 | CLL    | 69   | male   | n.d.      | no   | yes  |
| 71  | H084 | CLL    | 88   | male   | mutated   | no   | yes  |
| 72  | H086 | T-PLL  | 64   | male   | n.d.      | no   | yes  |
| 73  | H088 | CLL    | 60   | female | mutated   | no   | yes  |
| 74  | H089 | CLL    | 55   | female | mutated   | no   | yes  |
| 75  | H090 | CLL    | 70   | female | mutated   | yes  | yes  |
| 76  | H092 | MZL    | 82   | male   | mutated   | no   | yes  |
| 77  | H093 | CLL    | 76   | female | unmutated | no   | yes  |
| 78  | H094 | CLL    | 46   | male   | mutated   | no   | yes  |
| 79  | H095 | CLL    | 53   | female | unmutated | no   | yes  |
| 80  | H096 | CLL    | 62   | female | n.d.      | no   | yes  |
| 81  | H098 | MCL    | 79   | male   | unmutated | no   | no   |
| 82  | H099 | CLL    | 54   | female | mutated   | no   | yes  |
| 83  | H100 | CLL    | 74   | male   | mutated   | no   | yes  |
| 84  | H101 | CLL    | 73   | female | mutated   | no   | yes  |
| 85  | H102 | CLL    | 78   | female | unmutated | no   | yes  |
| 86  | H103 | CLL    | 71   | male   | mutated   | no   | yes  |
| 87  | H104 | CLL    | 79   | male   | unmutated | no   | yes  |
| 88  | H105 | CLL    | 49   | male   | mutated   | no   | yes  |
| 89  | H106 | CLL    | 71   | male   | mutated   | no   | yes  |
| 90  | H107 | CLL    | 43   | male   | unmutated | no   | yes  |
| 91  | H108 | CLL    | 57   | male   | mutated   | no   | yes  |
| 92  | H109 | CLL    | 85   | male   | unmutated | no   | yes  |
| 93  | H110 | CLL    | 66   | male   | mutated   | no   | yes  |
| 94  | H111 | CLL    | 55   | male   | unmutated | yes  | no   |
| 95  | H113 | CLL    | 70   | male   | mutated   | no   | yes  |
| 96  | H115 | CLL    | 72   | male   | mutated   | no   | no   |
| 97  | H117 | CLL    | 51   | female | unmutated | yes  | yes  |
| 98  | H118 | CLL    | 49   | male   | mutated   | yes  | yes  |
| 99  | H120 | MZL    | 74   | female | mutated   | no   | yes  |
| 100 | H122 | LPL    | 53   | male   | mutated   | no   | yes  |
| 101 | H126 | T-PLL  | 68   | male   | n.d.      | no   | yes  |
| 102 | H127 | T-PLL  | 69   | female | n.d.      | no   | no   |
| 103 | H128 | T-PLL  | 78   | female | n.d.      | no   | yes  |
| 104 | H133 | CLL    | 69   | male   | n.d.      | no   | yes  |
| 105 | H134 | Sezary | 67   | male   | n.d.      | yes  | yes  |
| 106 | H135 | CLL    | 76   | female | mutated   | yes  | no   |
| 107 | H136 | CLL    | 66   | male   | unmutated | yes  | yes  |
| 108 | H137 | CLL    | 53   | male   | mutated   | no   | yes  |
| 109 | H140 | HCL    | 55   | female | n.d.      | no   | yes  |
| 110 | H141 | MCL    | 46   | female | n.d.      | yes  | no   |
| 111 | H142 | MCL    | 67   | male   | n.d.      | no   | yes  |
| 112 | H143 | HCL-V  | n.d. | male   | n.d.      | n.d. | n.d. |
| 113 | H144 | MCL    | 67   | male   | n.d.      | yes  | no   |
| 114 | H145 | HCL    | 45   | male   | n.d.      | no   | yes  |
| 115 | H146 | MCL    | n.d. | male   | n.d.      | n.d. | no   |
| 116 | H147 | MCL    | 59   | male   | n.d.      | no   | yes  |
| 117 | H148 | CLL    | 34   | female | unmutated | yes  | no   |
| 118 | H149 | T-PLL  | 83   | male   | n.d.      | no   | no   |
| 119 | H150 | T-PLL  | 75   | female | n.d.      | no   | yes  |
| 120 | H151 | T-PLL  | 63   | female | n.d.      | no   | no   |
| 121 | H152 | T-PLL  | 42   | female | n.d.      | no   | no   |
| 122 | H153 | T-PLL  | 52   | female | n.d.      | yes  | no   |
| 123 | H154 | T-PLL  | 65   | female | n.d.      | no   | no   |
| 124 | H155 | T-PLL  | 74   | female | n.d.      | yes  | no   |
| 125 | H156 | B-PLL  | 61   | female | n.d.      | no   | no   |
| 126 | H157 | T-PLL  | 70   | female | n.d.      | no   | no   |
| 127 | H158 | MZL    | 60   | male   | n.d.      | yes  | yes  |
| 128 | H159 | LPL    | 58   | female | n.d.      | no   | yes  |

|     |      |       |    |        |           |      |     |
|-----|------|-------|----|--------|-----------|------|-----|
| 129 | H160 | LPL   | 62 | male   | n.d.      | yes  | yes |
| 130 | H161 | T-PLL | 83 | male   | n.d.      | no   | yes |
| 131 | H162 | MZL   | 50 | female | n.d.      | no   | yes |
| 132 | H163 | CLL   | 65 | male   | mutated   | no   | yes |
| 133 | H164 | CLL   | 73 | female | unmutated | no   | yes |
| 134 | H165 | CLL   | 58 | female | unmutated | no   | yes |
| 135 | H166 | CLL   | 63 | female | unmutated | no   | yes |
| 136 | H167 | CLL   | 64 | female | unmutated | no   | yes |
| 137 | H168 | CLL   | 58 | male   | n.d.      | yes  | yes |
| 138 | H169 | CLL   | 42 | female | mutated   | no   | yes |
| 139 | H170 | CLL   | 75 | female | mutated   | yes  | yes |
| 140 | H171 | CLL   | 73 | male   | unmutated | yes  | yes |
| 141 | H172 | T-PLL | 45 | male   | n.d.      | no   | yes |
| 142 | H173 | CLL   | 74 | female | mutated   | yes  | yes |
| 143 | H174 | CLL   | 64 | female | unmutated | yes  | yes |
| 144 | H175 | CLL   | 62 | male   | unmutated | yes  | yes |
| 145 | H176 | CLL   | 70 | male   | mutated   | no   | yes |
| 146 | H177 | CLL   | 70 | male   | unmutated | no   | yes |
| 147 | H178 | CLL   | 71 | male   | unmutated | yes  | yes |
| 148 | H179 | CLL   | 61 | male   | mutated   | no   | yes |
| 149 | H180 | CLL   | 86 | male   | unmutated | no   | yes |
| 150 | H181 | CLL   | 76 | female | mutated   | no   | yes |
| 151 | H182 | CLL   | 72 | female | mutated   | no   | yes |
| 152 | H183 | CLL   | 70 | male   | unmutated | no   | yes |
| 153 | H184 | CLL   | 75 | male   | mutated   | no   | no  |
| 154 | H185 | CLL   | 87 | female | mutated   | no   | no  |
| 155 | H186 | CLL   | 73 | female | mutated   | no   | yes |
| 156 | H187 | CLL   | 60 | male   | unmutated | no   | yes |
| 157 | H188 | T-PLL | 71 | male   | n.d.      | no   | no  |
| 158 | H189 | T-PLL | 71 | male   | n.d.      | yes  | yes |
| 159 | H190 | MCL   | 66 | male   | n.d.      | no   | yes |
| 160 | H191 | CLL   | 39 | male   | n.d.      | yes  | yes |
| 161 | H192 | CLL   | 72 | female | mutated   | no   | yes |
| 162 | H193 | CLL   | 81 | male   | mutated   | no   | yes |
| 163 | H194 | CLL   | 76 | male   | mutated   | no   | yes |
| 164 | H195 | T-PLL | 76 | male   | n.d.      | no   | yes |
| 165 | H196 | CLL   | 85 | male   | mutated   | no   | yes |
| 166 | H197 | CLL   | 74 | female | mutated   | yes  | yes |
| 167 | H198 | CLL   | 58 | female | mutated   | no   | yes |
| 168 | H199 | CLL   | 83 | male   | mutated   | no   | yes |
| 169 | H200 | CLL   | 83 | female | unmutated | yes  | yes |
| 170 | H201 | CLL   | 72 | female | n.d.      | no   | yes |
| 171 | H202 | CLL   | 80 | male   | mutated   | n.d. | yes |
| 172 | H203 | CLL   | 83 | female | mutated   | no   | yes |
| 173 | H204 | CLL   | 66 | female | n.d.      | no   | yes |
| 174 | H205 | CLL   | 66 | female | unmutated | no   | yes |
| 175 | H206 | CLL   | 69 | male   | mutated   | no   | yes |
| 176 | H207 | CLL   | 65 | male   | mutated   | no   | yes |
| 177 | H208 | CLL   | 73 | male   | mutated   | no   | yes |
| 178 | H209 | CLL   | 72 | female | mutated   | yes  | yes |
| 179 | H210 | CLL   | 73 | female | mutated   | no   | yes |
| 180 | H211 | CLL   | 51 | male   | unmutated | no   | yes |
| 181 | H212 | CLL   | 74 | male   | mutated   | no   | yes |
| 182 | H213 | CLL   | 63 | male   | mutated   | no   | yes |
| 183 | H214 | CLL   | 65 | male   | unmutated | no   | yes |
| 184 | H215 | CLL   | 47 | male   | unmutated | no   | yes |
| 185 | H216 | CLL   | 48 | female | mutated   | no   | yes |
| 186 | H217 | CLL   | 65 | male   | mutated   | no   | yes |
| 187 | H218 | CLL   | 50 | male   | n.d.      | yes  | yes |
| 188 | H219 | CLL   | 74 | female | mutated   | no   | yes |
| 189 | H220 | CLL   | 75 | female | mutated   | no   | yes |
| 190 | H221 | CLL   | 55 | male   | mutated   | no   | yes |
| 191 | H222 | CLL   | 56 | male   | mutated   | no   | yes |
| 192 | H223 | CLL   | 47 | female | mutated   | no   | yes |
| 193 | H224 | CLL   | 47 | male   | unmutated | no   | yes |
| 194 | H225 | CLL   | 47 | female | mutated   | no   | yes |

|     |      |          |    |        |           |      |      |
|-----|------|----------|----|--------|-----------|------|------|
| 195 | H226 | HCL      | 64 | male   | n.d.      | no   | yes  |
| 196 | H227 | MCL      | 64 | male   | n.d.      | no   | no   |
| 197 | H228 | CLL      | 65 | male   | unmutated | no   | yes  |
| 198 | H229 | CLL      | 75 | female | mutated   | yes  | no   |
| 199 | H230 | CLL      | 71 | male   | unmutated | yes  | no   |
| 200 | H231 | CLL      | 47 | male   | unmutated | no   | yes  |
| 201 | H232 | T-PLL    | 62 | male   | n.d.      | no   | yes  |
| 202 | H233 | CLL      | 55 | male   | unmutated | no   | yes  |
| 203 | H234 | CLL      | 68 | male   | unmutated | no   | yes  |
| 204 | H235 | CLL      | 73 | male   | mutated   | no   | yes  |
| 205 | H236 | CLL      | 67 | male   | mutated   | no   | yes  |
| 206 | H237 | CLL      | 73 | female | mutated   | no   | yes  |
| 207 | H238 | CLL      | 75 | male   | unmutated | no   | no   |
| 208 | H239 | CLL      | 70 | female | unmutated | no   | yes  |
| 209 | H240 | CLL      | 83 | male   | mutated   | no   | yes  |
| 210 | H241 | Sezary   | 59 | male   | n.d.      | no   | yes  |
| 211 | H242 | CLL      | 49 | male   | unmutated | no   | yes  |
| 212 | H243 | CLL      | 80 | male   | unmutated | no   | yes  |
| 213 | H244 | B-PLL    | 80 | male   | n.d.      | n.d. | yes  |
| 214 | H245 | PTCL-NOS | 80 | male   | n.d.      | yes  | yes  |
| 215 | H246 | CLL      | 75 | male   | unmutated | no   | yes  |
| 216 | H247 | CLL      | 47 | female | mutated   | no   | yes  |
| 217 | H248 | CLL      | 63 | female | mutated   | no   | yes  |
| 218 | H249 | CLL      | 83 | male   | unmutated | no   | yes  |
| 219 | H250 | CLL      | 52 | male   | unmutated | no   | yes  |
| 220 | H251 | HCL-V    | 73 | male   | n.d.      | no   | yes  |
| 221 | H252 | CLL      | 70 | male   | unmutated | no   | yes  |
| 222 | H253 | T-PLL    | 57 | female | n.d.      | no   | yes  |
| 223 | H254 | CLL      | 75 | male   | mutated   | no   | yes  |
| 224 | H255 | CLL      | 67 | male   | unmutated | yes  | yes  |
| 225 | H256 | CLL      | 63 | female | n.d.      | yes  | yes  |
| 226 | H257 | CLL      | 66 | female | unmutated | no   | yes  |
| 227 | H258 | CLL      | 65 | male   | mutated   | no   | yes  |
| 228 | H259 | CLL      | 60 | male   | unmutated | yes  | yes  |
| 229 | H260 | CLL      | 63 | male   | unmutated | yes  | yes  |
| 230 | H261 | T-PLL    | 49 | female | n.d.      | no   | yes  |
| 231 | H262 | T-PLL    | 86 | male   | n.d.      | no   | n.d. |
| 232 | H263 | T-PLL    | 77 | male   | n.d.      | n.d. | n.d. |
| 233 | H264 | CLL      | 77 | male   | mutated   | yes  | yes  |
| 234 | H265 | CLL      | 59 | male   | unmutated | yes  | yes  |
| 235 | H266 | CLL      | 74 | male   | mutated   | yes  | yes  |
| 236 | H267 | T-PLL    | 68 | male   | n.d.      | no   | no   |
| 237 | H268 | CLL      | 83 | male   | n.d.      | no   | yes  |
| 238 | H269 | MCL      | 46 | female | n.d.      | no   | no   |
| 239 | H270 | CLL      | 67 | female | mutated   | no   | yes  |
| 240 | H271 | CLL      | 65 | male   | mutated   | no   | yes  |
| 241 | H272 | CLL      | 56 | male   | unmutated | yes  | yes  |
| 242 | H273 | MZL      | 77 | male   | n.d.      | yes  | yes  |
| 243 | H274 | AML      | 61 | female | n.d.      | yes  | yes  |
| 244 | H275 | AML      | 77 | female | n.d.      | no   | no   |
| 245 | H276 | AML      | 62 | male   | n.d.      | no   | yes  |
| 246 | H277 | AML      | 83 | male   | n.d.      | no   | no   |
| 247 | H278 | AML      | 75 | male   | n.d.      | yes  | yes  |
| 248 | H279 | T-PLL    | 58 | male   | n.d.      | no   | yes  |
| 249 | H280 | MZL      | 63 | male   | n.d.      | no   | yes  |

Table S4: Sequencing quality. (IS: paired-end insert size)

| Patient ID | Sample type | On target [%] | Coverage | Total number of counts | Properly paired counts [%] | Singletons [%] | Duplicates [%] | IS sd | IS median | IS mean |
|------------|-------------|---------------|----------|------------------------|----------------------------|----------------|----------------|-------|-----------|---------|
| H005       | control     | 70.87         | 101.87   | 114477796              | 99.16                      | 0.09           | 9.94           | 58.76 | 183.00    | 195.98  |
| H005       | tumor       | 69.85         | 100.73   | 113683108              | 99.31                      | 0.08           | 9.34           | 67.14 | 195.00    | 209.35  |
| H006       | control     | 71.33         | 92.22    | 102245696              | 98.80                      | 0.12           | 9.32           | 62.16 | 183.00    | 196.19  |
| H006       | tumor       | 71.31         | 85.82    | 95976636               | 98.84                      | 0.10           | 8.56           | 62.78 | 184.00    | 197.75  |
| H008       | control     | 71.04         | 116.08   | 134779454              | 98.79                      | 0.13           | 12.43          | 57.55 | 178.00    | 190.42  |
| H008       | tumor       | 71.00         | 120.55   | 137208440              | 98.75                      | 0.13           | 11.25          | 60.47 | 180.00    | 193.24  |
| H009       | control     | 71.89         | 58.00    | 60520750               | 98.70                      | 0.09           | 4.84           | 65.61 | 185.00    | 199.4   |
| H009       | tumor       | 70.35         | 100.65   | 108254616              | 98.68                      | 0.11           | 5.44           | 63.84 | 184.00    | 197.61  |
| H010       | control     | 69.71         | 100.81   | 119497348              | 98.28                      | 0.35           | 9.82           | 57.92 | 181.00    | 193.18  |
| H010       | tumor       | 69.71         | 122.99   | 137540714              | 99.12                      | 0.14           | 7.49           | 64.91 | 190.00    | 204.34  |
| H011       | control     | 70.50         | 96.26    | 108350558              | 99.38                      | 0.08           | 9.70           | 63.79 | 192.00    | 205.63  |
| H011       | tumor       | 70.79         | 119.71   | 133363064              | 99.11                      | 0.09           | 9.38           | 61.04 | 186.00    | 198.54  |
| H012       | control     | 72.45         | 103.55   | 136812374              | 97.92                      | 0.30           | 23.67          | 60.60 | 209.00    | 218.72  |
| H012       | tumor       | 69.20         | 146.78   | 169012662              | 99.34                      | 0.10           | 9.78           | 62.45 | 197.00    | 210.04  |
| H013       | control     | 71.72         | 112.70   | 141532794              | 99.32                      | 0.11           | 19.82          | 59.57 | 210.00    | 219.76  |
| H013       | tumor       | 71.85         | 125.19   | 157586056              | 99.33                      | 0.10           | 20.16          | 61.36 | 214.00    | 223.9   |
| H014       | control     | 69.97         | 86.59    | 99911814               | 98.97                      | 0.12           | 8.89           | 62.56 | 186.00    | 199.38  |
| H014       | tumor       | 70.46         | 101.82   | 118072082              | 98.77                      | 0.16           | 9.48           | 59.61 | 183.00    | 195.34  |
| H015       | control     | 69.48         | 80.74    | 95228312               | 98.80                      | 0.16           | 10.12          | 59.46 | 182.00    | 194.13  |
| H015       | tumor       | 70.90         | 96.18    | 113157896              | 98.84                      | 0.15           | 11.57          | 60.52 | 184.00    | 196.86  |
| H016       | control     | 70.22         | 95.80    | 106555668              | 99.18                      | 0.09           | 8.26           | 62.13 | 186.00    | 199.41  |
| H016       | tumor       | 72.80         | 141.72   | 153687492              | 99.07                      | 0.23           | 8.76           | 63.37 | 197.00    | 210.06  |
| H017       | control     | 70.84         | 97.14    | 113931382              | 99.00                      | 0.13           | 11.43          | 62.22 | 185.00    | 198.5   |
| H017       | tumor       | 71.53         | 99.70    | 116371806              | 98.83                      | 0.16           | 11.52          | 60.44 | 182.00    | 194.59  |
| H018       | control     | 69.98         | 149.98   | 183593582              | 98.89                      | 0.13           | 15.60          | 63.09 | 184.00    | 197.78  |
| H018       | tumor       | 70.52         | 118.58   | 135685410              | 98.85                      | 0.12           | 11.09          | 63.42 | 185.00    | 199     |
| H019       | control     | 70.15         | 96.87    | 113565082              | 98.79                      | 0.13           | 10.44          | 62.82 | 186.00    | 198.95  |
| H019       | tumor       | 68.91         | 94.43    | 105641130              | 99.15                      | 0.09           | 7.24           | 65.19 | 191.00    | 205.23  |
| H020       | control     | 69.84         | 93.73    | 106990310              | 99.37                      | 0.08           | 10.02          | 62.47 | 191.00    | 204.17  |
| H020       | tumor       | 70.32         | 114.38   | 130986324              | 99.16                      | 0.09           | 11.25          | 66.25 | 192.00    | 206.5   |
| H021       | control     | 71.77         | 120.61   | 153754612              | 99.11                      | 0.14           | 20.79          | 61.52 | 211.00    | 221.84  |
| H021       | tumor       | 71.66         | 110.70   | 150228640              | 99.17                      | 0.14           | 25.52          | 61.58 | 211.00    | 221.81  |
| H022       | control     | 72.04         | 124.51   | 156901158              | 99.26                      | 0.12           | 20.55          | 61.50 | 213.00    | 223.23  |
| H022       | tumor       | 70.55         | 123.14   | 150974090              | 99.28                      | 0.11           | 16.47          | 62.30 | 212.00    | 222.5   |
| H023       | control     | 70.63         | 108.46   | 120513460              | 99.30                      | 0.08           | 8.78           | 59.12 | 187.00    | 198.79  |
| H023       | tumor       | 69.78         | 106.38   | 119232810              | 99.14                      | 0.09           | 8.59           | 63.48 | 189.00    | 202.36  |
| H024       | control     | 69.31         | 103.93   | 116213034              | 99.32                      | 0.09           | 7.53           | 66.04 | 195.00    | 208.64  |
| H024       | tumor       | 72.98         | 141.43   | 152657364              | 98.86                      | 0.24           | 8.41           | 64.23 | 195.00    | 208.14  |
| H026       | control     | 70.21         | 81.89    | 93474556               | 98.72                      | 0.15           | 10.31          | 61.91 | 182.00    | 195.84  |
| H026       | tumor       | 70.06         | 103.44   | 118141886              | 99.02                      | 0.10           | 9.07           | 62.37 | 186.00    | 198.93  |
| H027       | control     | 70.97         | 130.22   | 143390020              | 99.22                      | 0.12           | 7.94           | 60.08 | 192.00    | 204.72  |
| H027       | tumor       | 71.46         | 132.53   | 151252616              | 99.34                      | 0.11           | 11.90          | 62.91 | 197.00    | 210.45  |
| H028       | control     | 69.59         | 149.20   | 171792170              | 99.21                      | 0.09           | 10.59          | 64.07 | 190.00    | 203.46  |
| H028       | tumor       | 72.36         | 132.09   | 141908682              | 99.11                      | 0.22           | 7.43           | 63.13 | 199.00    | 212.23  |
| H029       | control     | 70.69         | 98.43    | 110639068              | 99.16                      | 0.10           | 9.80           | 62.45 | 188.00    | 201.12  |
| H029       | tumor       | 73.40         | 140.89   | 152283464              | 99.05                      | 0.23           | 9.29           | 65.79 | 202.00    | 215.39  |
| H030       | control     | 70.62         | 111.80   | 139664122              | 99.15                      | 0.12           | 18.10          | 61.86 | 213.00    | 223.75  |
| H030       | tumor       | 70.20         | 115.83   | 151721430              | 99.34                      | 0.11           | 21.50          | 62.55 | 214.00    | 224.05  |
| H031       | control     | 70.57         | 83.18    | 92086494               | 99.28                      | 0.08           | 8.36           | 66.08 | 193.00    | 207.45  |
| H031       | tumor       | 72.71         | 115.50   | 126724824              | 99.02                      | 0.24           | 9.65           | 65.79 | 201.00    | 214.56  |
| H033       | control     | 69.58         | 121.11   | 136357860              | 99.37                      | 0.08           | 8.48           | 61.71 | 189.00    | 202.48  |
| H033       | tumor       | 71.14         | 132.89   | 150202808              | 99.20                      | 0.08           | 11.21          | 61.99 | 189.00    | 201.73  |
| H035       | control     | 71.74         | 107.57   | 124637084              | 98.78                      | 0.13           | 13.19          | 57.85 | 178.00    | 190.13  |
| H035       | tumor       | 71.47         | 114.69   | 134956232              | 98.73                      | 0.13           | 14.69          | 62.21 | 182.00    | 195.54  |
| H036       | control     | 70.44         | 92.28    | 104265752              | 99.39                      | 0.07           | 10.07          | 64.43 | 193.00    | 206.93  |
| H036       | tumor       | 70.23         | 123.14   | 137064690              | 99.08                      | 0.10           | 8.56           | 65.06 | 190.00    | 203.76  |
| H037       | control     | 70.62         | 69.23    | 73580076               | 98.73                      | 0.09           | 4.83           | 63.87 | 184.00    | 197.38  |
| H037       | tumor       | 70.74         | 95.10    | 102603564              | 98.69                      | 0.08           | 6.54           | 69.31 | 191.00    | 206.28  |
| H038       | control     | 71.45         | 69.61    | 73984798               | 98.73                      | 0.08           | 5.97           | 70.32 | 190.00    | 205.4   |
| H038       | tumor       | 69.95         | 88.68    | 96480080               | 98.47                      | 0.10           | 6.05           | 65.60 | 185.00    | 198.73  |
| H039       | control     | 71.00         | 96.25    | 107941940              | 99.33                      | 0.08           | 10.06          | 60.55 | 187.00    | 200.05  |
| H039       | tumor       | 70.93         | 123.11   | 136533708              | 99.27                      | 0.08           | 9.24           | 63.64 | 190.00    | 203.98  |
| H040       | control     | 70.48         | 84.54    | 94484164               | 99.26                      | 0.09           | 9.03           | 60.07 | 186.00    | 198.78  |
| H040       | tumor       | 71.00         | 116.02   | 130386114              | 99.15                      | 0.09           | 10.50          | 63.95 | 191.00    | 204.78  |
| H041       | control     | 72.00         | 89.98    | 99849830               | 99.22                      | 0.09           | 10.34          | 57.89 | 184.00    | 196.53  |
| H041       | tumor       | 69.73         | 116.96   | 132858860              | 99.19                      | 0.09           | 9.67           | 63.90 | 190.00    | 203.7   |
| H042       | control     | 70.71         | 93.79    | 106388896              | 98.92                      | 0.14           | 7.72           | 60.93 | 183.00    | 196.27  |
| H042       | tumor       | 71.52         | 114.81   | 129078252              | 98.95                      | 0.10           | 9.83           | 62.26 | 185.00    | 198.04  |
| H043       | control     | 72.97         | 100.19   | 138794086              | 99.07                      | 0.14           | 28.48          | 58.59 | 207.00    | 216.84  |
| H043       | tumor       | 71.85         | 127.07   | 158504598              | 99.28                      | 0.13           | 19.17          | 62.11 | 210.00    | 221.33  |
| H044       | control     | 69.94         | 113.84   | 133946228              | 98.74                      | 0.14           | 10.40          | 60.66 | 182.00    | 194.92  |
| H044       | tumor       | 69.52         | 88.35    | 104567892              | 98.93                      | 0.16           | 10.04          | 62.23 | 187.00    | 199.99  |
| H045       | control     | 72.08         | 100.86   | 111607402              | 98.92                      | 0.13           | 9.65           | 60.67 | 183.00    | 195.61  |
| H045       | tumor       | 70.61         | 143.39   | 165670464              | 98.57                      | 0.14           | 11.96          | 60.66 | 178.00    | 191.67  |
| H046       | control     | 70.19         | 112.54   | 133052906              | 98.63                      | 0.14           | 12.87          | 62.96 | 181.00    | 194.93  |
| H046       | tumor       | 69.41         | 88.19    | 102145380              | 98.42                      | 0.17           | 10.56          | 88.94 | 189.00    | 213.89  |
| H047       | control     | 68.51         | 85.28    | 95420482               | 99.32                      | 0.08           | 6.47           | 65.53 | 193.00    | 207.23  |
| H047       | tumor       | 71.87         | 131.27   | 145355380              | 99.04                      | 0.21           | 9.64           | 61.27 | 192.00    | 205.06  |
| H049       | control     | 71.38         | 71.22    | 76278002               | 98.51                      | 0.10           | 6.47           | 69.74 | 188.00    | 203.47  |
| H049       | tumor       | 71.46         | 83.56    | 87848078               | 98.77                      | 0.08           | 4.92           | 65.45 | 187.00    | 200.87  |
| H051       | control     | 71.18         | 84.17    | 96721828               | 98.85                      | 0.14           | 9.96           | 67.96 | 186.00    | 201.57  |
| H051       | tumor       | 69.68         | 109.64   | 128011726              | 98.75                      | 0.17           | 8.90           | 58.63 | 182.00    | 193.83  |
| H053       | control     | 71.08         | 111.08   | 133102964              | 98.86                      | 0.13           | 15.26          | 60.90 | 182.00    | 195     |
| H053       | tumor       | 68.93         | 116.21   | 135839818              | 98.35                      | 0.19           | 10.39          | 84.25 | 188.00    | 210.68  |

|      |         |       |        |           |       |      |       |       |        |        |
|------|---------|-------|--------|-----------|-------|------|-------|-------|--------|--------|
| H054 | control | 70.65 | 92.40  | 104186672 | 99.41 | 0.07 | 10.12 | 63.95 | 193.00 | 205.97 |
| H054 | tumor   | 70.24 | 110.65 | 123962400 | 99.17 | 0.09 | 9.17  | 61.88 | 187.00 | 200.66 |
| H055 | control | 70.90 | 111.26 | 144145644 | 96.43 | 0.14 | 18.03 | 66.07 | 216.00 | 227.2  |
| H055 | tumor   | 70.48 | 102.43 | 123340268 | 97.01 | 0.15 | 12.17 | 68.23 | 217.00 | 229.37 |
| H056 | control | 70.85 | 109.27 | 127198560 | 98.91 | 0.12 | 12.47 | 59.48 | 181.00 | 193.72 |
| H056 | tumor   | 69.80 | 110.50 | 128627662 | 98.64 | 0.16 | 11.39 | 63.25 | 184.00 | 197.64 |
| H057 | control | 71.09 | 98.09  | 112871072 | 98.74 | 0.15 | 10.06 | 58.46 | 180.00 | 192.01 |
| H057 | tumor   | 70.47 | 114.05 | 133626156 | 98.69 | 0.17 | 10.37 | 60.80 | 183.00 | 196.14 |
| H058 | control | 70.18 | 89.31  | 98395246  | 99.37 | 0.07 | 7.39  | 63.26 | 191.00 | 204.17 |
| H058 | tumor   | 70.91 | 119.45 | 132748940 | 99.14 | 0.10 | 9.33  | 59.51 | 185.00 | 197.57 |
| H059 | control | 70.40 | 96.85  | 112277292 | 98.89 | 0.12 | 11.51 | 59.76 | 181.00 | 194.05 |
| H059 | tumor   | 69.91 | 116.14 | 131478638 | 98.80 | 0.13 | 9.13  | 63.79 | 184.00 | 198.24 |
| H060 | control | 70.15 | 91.43  | 101641254 | 99.26 | 0.09 | 7.95  | 59.95 | 186.00 | 199.07 |
| H060 | tumor   | 69.50 | 113.82 | 129966040 | 99.16 | 0.09 | 9.80  | 67.45 | 193.00 | 207.6  |
| H063 | control | 69.92 | 82.93  | 91464260  | 99.17 | 0.10 | 7.06  | 61.07 | 187.00 | 199.79 |
| H063 | tumor   | 72.43 | 128.94 | 138175638 | 99.13 | 0.21 | 7.30  | 64.65 | 200.00 | 214.15 |
| H064 | control | 70.71 | 77.34  | 84438652  | 99.23 | 0.09 | 7.17  | 59.04 | 185.00 | 197.64 |
| H064 | tumor   | 71.83 | 137.88 | 153998672 | 99.04 | 0.21 | 10.39 | 65.73 | 200.00 | 214.25 |
| H065 | control | 70.93 | 110.44 | 141403880 | 96.85 | 0.13 | 17.74 | 60.26 | 214.00 | 223.79 |
| H065 | tumor   | 71.30 | 127.12 | 155270820 | 96.65 | 0.14 | 14.00 | 63.16 | 218.00 | 228.4  |
| H066 | control | 71.99 | 124.19 | 159446274 | 99.31 | 0.14 | 21.61 | 61.39 | 212.00 | 222.45 |
| H066 | tumor   | 71.25 | 127.88 | 157471276 | 99.17 | 0.14 | 17.27 | 64.85 | 217.00 | 228.2  |
| H069 | control | 70.77 | 121.79 | 153330368 | 96.40 | 0.16 | 15.54 | 71.12 | 219.00 | 232.44 |
| H069 | tumor   | 70.51 | 107.83 | 137535898 | 96.31 | 0.14 | 16.20 | 65.83 | 215.00 | 227.02 |
| H070 | control | 70.44 | 64.49  | 73661856  | 98.77 | 0.09 | 11.21 | 69.34 | 188.00 | 203.05 |
| H070 | tumor   | 71.28 | 84.94  | 91043384  | 98.64 | 0.09 | 6.63  | 71.19 | 189.00 | 204.44 |
| H072 | control | 70.84 | 96.29  | 110370312 | 99.31 | 0.09 | 11.73 | 62.02 | 189.00 | 202.42 |
| H072 | tumor   | 69.99 | 116.27 | 133843720 | 99.17 | 0.09 | 11.22 | 69.18 | 196.00 | 211.03 |
| H073 | control | 70.43 | 86.71  | 97272384  | 99.32 | 0.09 | 9.24  | 63.48 | 192.00 | 204.92 |
| H073 | tumor   | 70.55 | 136.31 | 152360788 | 99.15 | 0.09 | 9.47  | 61.43 | 186.00 | 199.35 |
| H076 | control | 70.51 | 138.55 | 153438748 | 99.43 | 0.09 | 8.01  | 64.16 | 198.00 | 211.72 |
| H076 | tumor   | 68.46 | 172.41 | 198417054 | 99.12 | 0.13 | 8.60  | 58.91 | 191.00 | 203.07 |
| H077 | control | 72.17 | 104.41 | 117815802 | 98.91 | 0.15 | 9.24  | 57.91 | 179.00 | 191.55 |
| H077 | tumor   | 70.37 | 102.86 | 115722266 | 98.70 | 0.13 | 8.12  | 59.79 | 180.00 | 193.09 |
| H078 | control | 70.87 | 169.84 | 191180514 | 99.32 | 0.11 | 9.83  | 63.97 | 197.00 | 210.81 |
| H078 | tumor   | 70.96 | 118.76 | 132501532 | 99.25 | 0.12 | 9.12  | 60.42 | 195.00 | 207.42 |
| H079 | control | 71.23 | 97.81  | 108232312 | 98.88 | 0.13 | 8.81  | 61.00 | 183.00 | 195.88 |
| H079 | tumor   | 70.73 | 97.45  | 110676532 | 98.87 | 0.10 | 9.09  | 61.48 | 181.00 | 194.76 |
| H080 | control | 72.29 | 99.21  | 114493242 | 98.60 | 0.16 | 11.97 | 59.57 | 180.00 | 192.46 |
| H080 | tumor   | 70.73 | 122.05 | 140559358 | 98.73 | 0.17 | 9.30  | 57.23 | 179.00 | 191.46 |
| H081 | control | 69.40 | 94.12  | 110488948 | 98.44 | 0.32 | 8.77  | 62.76 | 185.00 | 198.29 |
| H081 | tumor   | 68.96 | 126.34 | 140044902 | 99.00 | 0.14 | 5.53  | 64.08 | 188.00 | 201.83 |
| H082 | control | 70.78 | 87.43  | 100619150 | 98.44 | 0.31 | 8.71  | 60.54 | 184.00 | 196.58 |
| H082 | tumor   | 70.57 | 144.66 | 166890730 | 99.05 | 0.15 | 11.45 | 63.25 | 188.00 | 201.64 |
| H083 | control | 69.89 | 91.39  | 107234010 | 98.56 | 0.31 | 9.20  | 66.10 | 190.00 | 204.3  |
| H083 | tumor   | 71.05 | 122.49 | 133903788 | 99.31 | 0.09 | 7.63  | 63.56 | 190.00 | 203.5  |
| H084 | control | 69.64 | 88.97  | 103190434 | 98.44 | 0.33 | 7.64  | 63.32 | 187.00 | 200.33 |
| H084 | tumor   | 70.52 | 139.81 | 153972640 | 99.14 | 0.11 | 7.45  | 61.03 | 187.00 | 199.59 |
| H085 | control | 70.19 | 89.04  | 98516288  | 99.18 | 0.10 | 7.62  | 58.85 | 184.00 | 196.34 |
| H085 | tumor   | 72.45 | 133.84 | 148317308 | 99.01 | 0.22 | 10.47 | 62.59 | 193.00 | 205.67 |
| H087 | control | 71.44 | 142.59 | 159930924 | 98.93 | 0.15 | 10.15 | 65.27 | 201.00 | 214.27 |
| H087 | tumor   | 73.03 | 133.75 | 144497896 | 99.10 | 0.14 | 8.88  | 60.40 | 194.00 | 206.16 |
| H088 | control | 70.93 | 92.46  | 102501014 | 98.88 | 0.12 | 8.69  | 60.74 | 181.00 | 194.14 |
| H088 | tumor   | 70.82 | 116.66 | 140741950 | 99.04 | 0.12 | 13.31 | 64.20 | 189.00 | 202.47 |
| H089 | control | 70.98 | 79.00  | 90773944  | 98.44 | 0.33 | 8.90  | 61.70 | 185.00 | 197.64 |
| H089 | tumor   | 72.11 | 114.86 | 129714704 | 99.31 | 0.09 | 12.08 | 61.47 | 187.00 | 199.89 |
| H090 | control | 70.80 | 172.81 | 194968154 | 99.35 | 0.10 | 10.16 | 57.81 | 189.00 | 200.5  |
| H090 | tumor   | 71.71 | 154.01 | 175616632 | 99.11 | 0.14 | 12.10 | 63.08 | 198.00 | 211.25 |
| H093 | control | 70.81 | 94.58  | 107239232 | 98.88 | 0.15 | 7.83  | 58.37 | 180.00 | 192.2  |
| H093 | tumor   | 70.92 | 110.83 | 124511960 | 98.98 | 0.10 | 8.98  | 63.66 | 185.00 | 199.05 |
| H094 | control | 70.09 | 86.49  | 100193342 | 98.32 | 0.35 | 8.16  | 60.91 | 185.00 | 197.29 |
| H094 | tumor   | 71.51 | 88.65  | 96394840  | 99.35 | 0.08 | 8.04  | 63.73 | 190.00 | 203.3  |
| H095 | control | 68.88 | 82.10  | 96288258  | 98.28 | 0.36 | 7.63  | 62.95 | 187.00 | 199.84 |
| H095 | tumor   | 70.35 | 140.86 | 156984358 | 99.26 | 0.09 | 8.71  | 61.35 | 188.00 | 200.75 |
| H096 | control | 71.00 | 80.26  | 89143292  | 98.89 | 0.15 | 6.20  | 60.90 | 181.00 | 194.49 |
| H096 | tumor   | 70.87 | 120.64 | 139634652 | 98.71 | 0.14 | 10.45 | 60.14 | 181.00 | 193.88 |
| H097 | control | 70.99 | 96.02  | 113270484 | 98.27 | 0.35 | 11.21 | 57.68 | 179.00 | 191.21 |
| H097 | tumor   | 72.03 | 111.47 | 122425280 | 99.30 | 0.08 | 9.72  | 60.12 | 186.00 | 198.59 |
| H098 | control | 71.47 | 92.28  | 101286450 | 98.69 | 0.13 | 8.52  | 56.33 | 177.00 | 188.95 |
| H098 | tumor   | 70.15 | 117.66 | 136391188 | 98.90 | 0.10 | 10.58 | 62.41 | 185.00 | 198.43 |
| H099 | control | 71.33 | 60.43  | 63712976  | 98.68 | 0.08 | 5.16  | 67.01 | 187.00 | 201.52 |
| H099 | tumor   | 70.56 | 128.69 | 140361002 | 98.64 | 0.09 | 6.99  | 65.77 | 186.00 | 199.67 |
| H100 | control | 58.78 | 104.04 | 145699794 | 98.56 | 0.16 | 11.61 | 64.44 | 184.00 | 198.39 |
| H100 | tumor   | 71.57 | 134.78 | 161903948 | 98.73 | 0.13 | 16.54 | 61.16 | 181.00 | 194.19 |
| H101 | control | 70.29 | 81.58  | 95314000  | 98.39 | 0.31 | 9.37  | 60.60 | 184.00 | 196.17 |
| H101 | tumor   | 71.15 | 143.80 | 160090178 | 99.39 | 0.08 | 9.39  | 60.33 | 187.00 | 200.21 |
| H102 | control | 70.92 | 157.90 | 202408008 | 98.36 | 0.34 | 18.38 | 61.89 | 185.00 | 197.48 |
| H102 | tumor   | 70.57 | 122.06 | 134170722 | 99.39 | 0.07 | 7.50  | 61.16 | 189.00 | 201.52 |
| H103 | control | 70.91 | 74.07  | 79017888  | 98.69 | 0.09 | 5.47  | 65.83 | 187.00 | 200.44 |
| H103 | tumor   | 69.38 | 95.17  | 103900056 | 98.49 | 0.10 | 5.39  | 71.54 | 188.00 | 204.34 |
| H104 | control | 70.68 | 80.06  | 92487494  | 98.92 | 0.13 | 9.13  | 60.35 | 182.00 | 194.51 |
| H104 | tumor   | 71.26 | 109.92 | 129003728 | 98.98 | 0.12 | 12.29 | 63.89 | 187.00 | 200.85 |
| H105 | control | 70.42 | 84.89  | 95010688  | 99.28 | 0.09 | 9.10  | 64.50 | 191.00 | 204.55 |
| H105 | tumor   | 72.55 | 116.27 | 126097680 | 99.16 | 0.21 | 8.58  | 63.62 | 201.00 | 213.84 |
| H107 | control | 69.23 | 87.38  | 101800404 | 98.78 | 0.16 | 8.53  | 57.59 | 179.00 | 191.07 |
| H107 | tumor   | 71.34 | 110.18 | 130210444 | 98.58 | 0.19 | 12.31 | 57.16 | 178.00 | 190.27 |
| H108 | control | 70.52 | 84.48  | 94762816  | 99.33 | 0.08 | 9.45  | 59.29 | 186.00 | 198.09 |
| H108 | tumor   | 70.05 | 133.54 | 152033424 | 99.08 | 0.10 | 10.32 | 62.02 | 188.00 | 200.9  |
| H109 | control | 71.55 | 110.03 | 119080536 | 98.54 | 0.13 | 7.55  | 65.16 | 185.00 | 198.88 |
| H109 | tumor   | 70.10 | 78.36  | 83865042  | 98.62 | 0.09 | 4.76  | 67.86 | 186.00 | 200.89 |
| H110 | control | 71.25 | 70.42  | 74931292  | 98.73 | 0.10 | 5.58  | 66.05 | 188.00 | 201.51 |

|      |         |       |        |           |       |      |       |       |        |        |
|------|---------|-------|--------|-----------|-------|------|-------|-------|--------|--------|
| H110 | tumor   | 69.38 | 83.24  | 89956984  | 98.49 | 0.09 | 4.64  | 67.87 | 186.00 | 200.78 |
| H111 | control | 71.24 | 107.22 | 122900498 | 98.86 | 0.12 | 11.64 | 61.37 | 182.00 | 195.58 |
| H111 | tumor   | 72.20 | 113.56 | 130021700 | 99.39 | 0.07 | 13.35 | 61.85 | 190.00 | 202.74 |
| H112 | control | 70.66 | 74.02  | 86057790  | 98.73 | 0.15 | 9.71  | 61.16 | 181.00 | 194.1  |
| H112 | tumor   | 70.14 | 104.61 | 123247630 | 98.97 | 0.14 | 10.19 | 60.82 | 184.00 | 196.55 |
| H113 | control | 71.02 | 97.32  | 104875918 | 98.84 | 0.11 | 6.21  | 60.48 | 182.00 | 194.87 |
| H113 | tumor   | 71.31 | 104.67 | 113260346 | 99.37 | 0.08 | 7.29  | 60.29 | 187.00 | 199.37 |
| H114 | control | 70.13 | 139.07 | 163797750 | 98.85 | 0.12 | 12.59 | 64.12 | 186.00 | 199.61 |
| H114 | tumor   | 70.89 | 129.29 | 151239260 | 98.73 | 0.13 | 13.38 | 60.88 | 182.00 | 194.89 |
| H115 | control | 70.17 | 95.22  | 110971754 | 99.03 | 0.13 | 11.59 | 76.32 | 192.00 | 210.68 |
| H115 | tumor   | 70.73 | 115.48 | 125670208 | 99.24 | 0.09 | 7.00  | 59.83 | 183.00 | 195.72 |
| H116 | control | 70.90 | 99.51  | 120809708 | 98.83 | 0.13 | 16.11 | 64.53 | 186.00 | 200.2  |
| H116 | tumor   | 71.87 | 107.06 | 117494334 | 99.30 | 0.08 | 9.40  | 59.50 | 185.00 | 197.7  |
| H117 | control | 71.23 | 107.87 | 128685556 | 98.92 | 0.12 | 15.16 | 58.96 | 180.00 | 192.83 |
| H117 | tumor   | 70.34 | 120.91 | 136210442 | 98.89 | 0.11 | 9.46  | 63.53 | 186.00 | 199.39 |
| H118 | control | 71.13 | 81.22  | 92306414  | 98.88 | 0.12 | 8.31  | 61.32 | 183.00 | 196.06 |
| H118 | tumor   | 70.26 | 120.09 | 138068768 | 98.74 | 0.14 | 8.93  | 60.78 | 183.00 | 195.52 |
| H119 | control | 71.32 | 101.23 | 121427228 | 98.88 | 0.13 | 14.11 | 63.70 | 185.00 | 198.63 |
| H119 | tumor   | 70.68 | 116.72 | 140050528 | 98.56 | 0.20 | 12.65 | 58.80 | 178.00 | 190.97 |
| H120 | control | 70.97 | 97.84  | 112435532 | 98.97 | 0.12 | 11.41 | 60.61 | 182.00 | 194.54 |
| H120 | tumor   | 70.32 | 127.82 | 153833542 | 98.85 | 0.14 | 15.05 | 63.18 | 184.00 | 197.77 |
| H121 | control | 70.89 | 88.66  | 100204660 | 98.95 | 0.12 | 7.45  | 62.16 | 183.00 | 196.52 |
| H121 | tumor   | 70.73 | 122.38 | 141903496 | 98.69 | 0.16 | 9.40  | 57.21 | 178.00 | 189.98 |
| H122 | control | 71.03 | 81.06  | 87991286  | 98.91 | 0.12 | 6.98  | 61.84 | 183.00 | 196.06 |
| H122 | tumor   | 70.20 | 89.83  | 103777386 | 99.03 | 0.10 | 10.39 | 64.24 | 187.00 | 200.87 |
| H133 | control | 70.37 | 69.28  | 74335320  | 98.59 | 0.10 | 5.25  | 65.71 | 186.00 | 199.73 |
| H133 | tumor   | 70.91 | 96.89  | 104124174 | 98.64 | 0.09 | 6.29  | 66.23 | 186.00 | 200.49 |
| H148 | control | 70.98 | 89.30  | 97623988  | 98.84 | 0.12 | 7.47  | 59.60 | 180.00 | 192.86 |
| H148 | tumor   | 71.00 | 107.46 | 119967166 | 98.74 | 0.11 | 7.87  | 58.73 | 178.00 | 191.15 |
| H163 | control | 71.08 | 77.80  | 84193280  | 98.45 | 0.11 | 7.01  | 70.24 | 190.00 | 204.78 |
| H163 | tumor   | 70.18 | 89.62  | 96116130  | 98.81 | 0.09 | 5.16  | 69.19 | 189.00 | 204.16 |
| H164 | control | 70.55 | 80.38  | 87446594  | 98.52 | 0.11 | 6.59  | 71.24 | 189.00 | 204.6  |
| H164 | tumor   | 68.85 | 100.05 | 110248782 | 98.70 | 0.09 | 5.82  | 72.57 | 192.00 | 207.7  |
| H165 | control | 71.33 | 62.88  | 65874362  | 98.60 | 0.10 | 4.32  | 61.62 | 180.00 | 193.33 |
| H165 | tumor   | 70.88 | 80.98  | 86623174  | 98.80 | 0.09 | 5.91  | 69.32 | 190.00 | 204.96 |
| H167 | control | 71.86 | 76.06  | 79810566  | 98.68 | 0.08 | 5.36  | 66.82 | 186.00 | 200.42 |
| H167 | tumor   | 69.93 | 102.84 | 112436480 | 98.75 | 0.09 | 6.48  | 69.28 | 189.00 | 204.33 |
| H171 | control | 70.43 | 73.69  | 79161220  | 98.57 | 0.10 | 5.45  | 66.84 | 186.00 | 200.49 |
| H171 | tumor   | 69.78 | 115.41 | 126620474 | 98.80 | 0.09 | 6.57  | 66.44 | 187.00 | 201.65 |
| H173 | control | 70.02 | 69.45  | 73848372  | 98.68 | 0.09 | 4.06  | 72.45 | 189.00 | 205.66 |
| H173 | tumor   | 71.15 | 86.47  | 94437086  | 98.79 | 0.09 | 8.08  | 69.99 | 191.00 | 205.9  |
| H187 | control | 71.12 | 74.07  | 79239724  | 98.56 | 0.10 | 6.12  | 63.58 | 184.00 | 197.09 |
| H187 | tumor   | 70.40 | 96.02  | 102980058 | 98.63 | 0.11 | 5.29  | 66.35 | 187.00 | 201.17 |
| H190 | control | 71.61 | 65.33  | 68670786  | 98.66 | 0.09 | 4.98  | 65.43 | 185.00 | 199.41 |
| H190 | tumor   | 70.18 | 83.05  | 89259284  | 98.72 | 0.08 | 5.48  | 67.72 | 189.00 | 203.14 |
| H191 | control | 70.99 | 69.32  | 73755348  | 98.69 | 0.10 | 5.30  | 63.63 | 183.00 | 196.98 |
| H191 | tumor   | 69.46 | 86.04  | 93361880  | 98.73 | 0.08 | 5.36  | 66.01 | 186.00 | 200.4  |
| H225 | control | 71.86 | 67.38  | 70664770  | 98.87 | 0.08 | 5.35  | 66.05 | 187.00 | 201.31 |
| H225 | tumor   | 70.17 | 76.14  | 81687484  | 98.79 | 0.08 | 5.38  | 79.13 | 194.00 | 212.35 |
| H227 | control | 70.55 | 77.04  | 82575520  | 98.73 | 0.09 | 5.32  | 66.65 | 187.00 | 201.46 |
| H227 | tumor   | 70.16 | 79.33  | 85192968  | 98.69 | 0.09 | 5.05  | 69.00 | 188.00 | 203.38 |
| H228 | control | 70.99 | 57.34  | 59536644  | 98.62 | 0.11 | 2.79  | 69.74 | 188.00 | 203.75 |
| H228 | tumor   | 69.60 | 128.35 | 142614566 | 98.69 | 0.09 | 7.48  | 69.66 | 190.00 | 204.8  |
| H230 | control | 70.84 | 63.52  | 66900496  | 98.80 | 0.10 | 4.12  | 66.78 | 187.00 | 201.52 |
| H230 | tumor   | 71.28 | 102.04 | 110551048 | 98.82 | 0.08 | 7.49  | 68.64 | 189.00 | 204.13 |
| H231 | control | 71.29 | 68.71  | 72443982  | 98.49 | 0.09 | 4.88  | 67.77 | 190.00 | 204.45 |
| H231 | tumor   | 70.05 | 107.95 | 118923772 | 98.75 | 0.09 | 7.33  | 68.52 | 189.00 | 203.78 |
| H233 | control | 70.68 | 56.46  | 58899216  | 98.52 | 0.12 | 2.66  | 70.51 | 185.00 | 201.46 |
| H233 | tumor   | 69.12 | 101.09 | 111670474 | 98.76 | 0.09 | 6.26  | 73.37 | 192.00 | 208.61 |
| H234 | control | 70.56 | 63.77  | 67709056  | 98.79 | 0.09 | 4.59  | 69.27 | 189.00 | 203.97 |
| H234 | tumor   | 71.45 | 97.08  | 104005544 | 98.66 | 0.09 | 6.66  | 66.81 | 186.00 | 200.51 |
| H236 | control | 71.72 | 73.67  | 77321468  | 98.58 | 0.09 | 5.13  | 64.32 | 184.00 | 197.13 |
| H236 | tumor   | 70.22 | 94.12  | 101670542 | 98.68 | 0.10 | 5.76  | 67.51 | 187.00 | 201.95 |
| H238 | control | 70.88 | 74.43  | 79133764  | 98.58 | 0.10 | 5.11  | 63.73 | 183.00 | 196.64 |
| H238 | tumor   | 69.34 | 93.97  | 102750964 | 98.70 | 0.10 | 5.69  | 68.30 | 189.00 | 203.21 |
| H240 | control | 71.06 | 70.53  | 74679914  | 98.65 | 0.09 | 4.94  | 65.76 | 185.00 | 199.53 |
| H240 | tumor   | 71.00 | 97.66  | 106280466 | 98.81 | 0.09 | 7.61  | 70.91 | 191.00 | 206.5  |

Table S5: **Target profiling of AZD7762 and PF477736 in cell lysates of K562 cells.** Targets identified in kinobead assays for AZD7762 and PF477736 at 2 and 10  $\mu$ M are shown. A target score of  $<0.5$  indicates a good target specificity. The column BCR indicates if the protein was identified as a B-cell receptor responsive protein after IgM stimulation in Burkitt lymphoma cell lines [13].

| Nb. | Gene         | AZD7762-10 | AZD7762-2 | PF477736-10 | PF477736-2 | BCR |
|-----|--------------|------------|-----------|-------------|------------|-----|
| 1   | AAK1         | 0.25       | 0.39      | 0.23        | 0.23       | No  |
| 2   | ABL1         | 0.28       | 0.40      | 0.44        | 0.73       | Yes |
| 3   | AURKA        | 0.89       | 0.92      | 0.48        | 0.65       |     |
| 4   | AURKB        | 0.50       | 0.52      | 0.43        | 0.52       | No  |
| 5   | AXL          | 0.45       | 0.68      | 0.50        | 0.68       |     |
| 6   | BCR          | 0.28       | 0.37      | 0.57        | 0.78       | No  |
| 7   | BMP2K        | 0.23       | 0.43      | 0.21        | 0.20       | No  |
| 8   | BRSK2        | 0.37       | 0.52      | 0.62        | 0.90       |     |
| 9   | CAMK2G       | 0.48       | 0.79      | 0.60        | 1.00       |     |
| 10  | CHEK1        | 0.28       | 0.26      | 0.29        | 0.26       | Yes |
| 12  | CHEK2        | 0.17       | 0.19      | 0.24        | 0.43       | No  |
| 13  | CIT          | 0.56       | 0.80      | 0.40        | 0.44       | Yes |
| 14  | CSK          | 0.19       | 0.32      | 0.66        | 0.93       | No  |
| 15  | EGFR         | 0.33       | 0.60      | 0.54        | 0.86       |     |
| 16  | EPHA7        | 0.28       | 0.54      | 0.77        | 0.93       |     |
| 17  | FER          | 0.24       | 0.35      | 0.88        | 1.07       | No  |
| 18  | FES          | 0.46       | 0.72      | 0.94        | 1.04       |     |
| 19  | FGFR2        | 0.87       | 1.02      | 0.44        | 0.65       |     |
| 20  | FLT4         | 0.48       | 0.52      | 0.55        | 0.61       |     |
| 21  | FRK          | 0.39       | 0.69      | 0.82        | 0.95       |     |
| 22  | FYN          | 0.28       | 0.47      | 0.46        | 0.79       | No  |
| 23  | GAK          | 0.23       | 0.31      | 0.21        | 0.25       | No  |
| 24  | HCK          | 0.28       | 0.39      | 0.52        | 0.69       | Yes |
| 25  | IRAK4        | 0.25       | 0.40      | 0.56        | 0.88       | No  |
| 26  | KIAA0999     | 0.40       | 0.48      | 0.41        | 0.45       | No  |
| 27  | LIMK2        | 1.11       | 1.07      | 0.33        | 0.41       | No  |
| 28  | LOC100128443 | 0.94       | 0.95      | 0.36        | 0.21       | No  |
| 29  | LYN          | 0.33       | 0.53      | 0.40        | 0.58       | Yes |
| 30  | MAP2K1       | 0.30       | 0.47      | 0.73        | 0.95       | Yes |
| 31  | MAP2K2       | 0.22       | 0.43      | 0.63        | 0.84       | Yes |
| 32  | MAP2K5       | 0.21       | 0.29      | 0.45        | 0.74       | No  |
| 33  | MAP3K11      | 0.43       | 0.46      | 0.63        | 0.83       | No  |
| 34  | MAP3K2       | 0.40       | 0.64      | 0.67        | 0.83       |     |
| 35  | MAP3K3       | 0.46       | 0.71      | 1.13        | 0.94       |     |
| 36  | MAP3K7       | 0.49       | 0.77      | 0.77        | 0.95       |     |
| 37  | MAP4K3       | 0.29       | 0.45      | 0.47        | 0.73       | No  |
| 38  | MAP4K4       | 0.25       | 0.29      | 0.58        | 0.87       | No  |
| 39  | MAP4K5       | 0.27       | 0.32      | 0.37        | 0.71       | Yes |
| 40  | MAPK3        | 1.16       | 1.14      | 0.38        | 0.74       |     |
| 41  | MARK1        | 0.25       | 0.33      | 0.36        | 0.54       | No  |
| 42  | MARK2        | 0.23       | 0.35      | 0.39        | 0.54       | Yes |
| 44  | MARK3        | 0.26       | 0.30      | 0.37        | 0.53       | No  |
| 45  | MARK4        | 0.34       | 0.55      | 0.17        | 0.24       | No  |
| 46  | MERTK        | 0.43       | 0.44      | 0.71        | 0.90       | No  |
| 47  | MINK1        | 0.37       | 0.39      | 0.55        | 0.80       | No  |
| 48  | MYLK3        | 0.18       | 0.26      |             |            | No  |
| 49  | PAK4         | 0.22       | 0.27      | 0.30        | 0.33       | No  |
| 50  | PDPK1        | 0.20       | 0.30      | 0.38        | 0.58       | No  |
| 51  | PKN2         | 0.34       | 0.52      | 0.36        | 0.61       |     |
| 52  | PRKAA1       | 0.33       | 0.52      | 0.41        | 0.66       |     |
| 53  | PRKAA2       | 0.42       | 0.65      | 0.58        | 0.85       |     |
| 54  | PRKCD        | 0.28       | 0.47      | 0.68        | 0.95       | Yes |
| 55  | PRKG1        | 0.37       | 0.71      | 0.68        | 0.96       |     |
| 56  | PRKX         | 0.25       | 0.25      | 0.10        | 0.32       | No  |



|     |          |      |      |      |      |     |
|-----|----------|------|------|------|------|-----|
| 57  | PTK2B    | 0.40 | 0.68 | 0.96 | 1.07 |     |
| 58  | RPS6KA4  | 0.54 | 0.70 | 0.45 | 0.69 |     |
| 59  | SIK2     | 0.28 | 0.33 | 0.27 | 0.34 | No  |
| 60  | SLK      | 0.27 | 0.44 | 0.73 | 0.92 | Yes |
| 61  | SRC      | 0.25 | 0.35 | 0.50 | 0.83 | No  |
| 62  | STK10    | 0.27 | 0.41 | 0.78 | 0.94 | Yes |
| 63  | STK17A   | 0.35 | 0.76 | 0.35 | 0.41 | No  |
| 64  | STK3     | 0.28 | 0.37 | 0.65 | 0.87 | No  |
| 65  | STK33    | 0.26 | 0.43 | 0.77 | 1.02 | No  |
| 66  | STK35    | 0.49 | 0.72 |      |      |     |
| 67  | STK4     | 0.20 | 0.21 | 0.65 | 0.94 | No  |
| 68  | SYK      | 0.30 | 0.46 | 0.70 | 0.92 | Yes |
| 69  | TGFBR2   | 0.36 | 0.36 | 0.62 | 0.78 | No  |
| 70  | TNIK     | 0.37 | 0.41 | 0.41 | 0.70 | No  |
| 71  | TNK2     | 0.42 | 0.61 | 0.79 | 0.85 |     |
| 72  | YES1     | 0.38 | 0.64 | 0.38 | 0.75 |     |
| 73  | ACADM    | 0.40 | 0.39 | 1.00 | 1.03 | No  |
| 74  | FASN     | 0.23 | 0.24 | 1.27 | 0.99 | Yes |
| 75  | IDH2     | 0.49 | 0.54 |      |      |     |
| 76  | ME1      | 0.25 | 0.28 |      |      | No  |
| 77  | PRDX2    | 0.44 | 0.49 | 1.25 | 1.07 | No  |
| 78  | SOD2     | 0.44 | 0.53 | 1.45 | 1.13 |     |
| 79  | CTSD     | 0.45 | 0.49 | 1.26 | 0.95 | No  |
| 80  | ANXA2    | 0.40 | 0.43 | 1.20 | 0.96 | Yes |
| 81  | AP2A1    | 0.28 | 0.48 | 0.43 | 0.45 | No  |
| 82  | AP2A2    | 0.30 | 0.37 | 0.54 | 0.52 | No  |
| 83  | AP2B1    | 0.26 | 0.43 | 0.19 | 0.21 | No  |
| 84  | AP2M1    | 0.25 | 0.37 | 0.32 | 0.34 | No  |
| 85  | AP2S1    | 0.32 | 0.45 | 0.50 | 0.49 | No  |
| 86  | C20ORF3  | 0.39 | 0.40 |      |      | No  |
| 87  | CALML3   | 0.18 | 0.18 |      |      | No  |
| 88  | FDPS     | 0.42 | 0.45 | 1.19 | 1.02 | No  |
| 89  | GRB2     | 0.30 | 0.32 | 0.50 | 0.72 | Yes |
| 90  | INCENP   | 0.24 | 0.35 | 0.41 | 0.47 | No  |
| 91  | LGALS7   | 0.18 | 0.17 |      |      | No  |
| 92  | MOBK1B   | 1.03 | 0.98 | 0.45 | 0.71 |     |
| 93  | PHKA2    | 0.47 | 0.54 |      |      |     |
| 94  | PKP1     | 0.31 | 1.36 | 0.72 | 0.48 | No  |
| 95  | PRKAB1   | 0.23 | 0.40 | 0.31 | 0.61 | No  |
| 96  | PRKAB2   | 0.18 | 0.37 | 0.32 | 0.58 | No  |
| 97  | PRKAG1   | 0.27 | 0.47 | 0.36 | 0.64 | No  |
| 98  | PRKAG2   | 0.32 | 0.51 | 0.43 | 0.61 |     |
| 99  | S100A7   | 0.28 | 0.29 | 1.56 | 1.02 | No  |
| 100 | S100A8   | 0.16 | 0.24 | 5.77 | 1.04 | No  |
| 101 | S100A9   | 0.24 | 0.42 | 2.20 | 0.84 | No  |
| 102 | SERP1B12 | 0.69 | 2.30 | 0.62 | 0.48 | No  |
| 103 | YJ005    | 0.36 | 0.46 | 0.48 | 0.50 | No  |
| 104 | EXOSC6   |      |      | 0.18 | 0.21 | No  |

Table S6: **Multivariate Cox regression model for overall survival with response to fludarabine as a covariate.**

The impact of response to fludarabine on overall survival was tested considering other important covariates. Complete case analysis was performed for  $n = 156$  CLL patients (events:  $n=24$ ).

|                                        | <i>p</i> -value      | HR   | lower 95% CI | upper 95% CI |
|----------------------------------------|----------------------|------|--------------|--------------|
| age (per 10 years)                     | 0.4                  | 1.2  | 0.81         | 1.7          |
| pretreatment                           | $2.8 \times 10^{-4}$ | 9.2  | 2.8          | 31           |
| trisomy 12                             | 0.02                 | 5.3  | 1.3          | 22           |
| del(11)(q22.3)                         | 0.78                 | 1.2  | 0.38         | 3.6          |
| del(17)(p13)                           | 0.96                 | 1    | 0.3          | 3.6          |
| TP53                                   | 0.47                 | 0.63 | 0.18         | 2.2          |
| U-CLL                                  | 0.05                 | 2.8  | 0.99         | 7.8          |
| fludarabine (per 10% viability change) | 0.09                 | 0.8  | 0.57         | 1.1          |

Table S7: **Multivariate Cox regression model for overall survival with response to doxorubicin as a covariate.**

Similar to Table S6, but with doxorubicine instead of fludarabine as a covariate. Complete case analysis was performed for  $n = 156$  CLL patients (events:  $n=24$ ).

|                                         | <i>p</i> -value      | HR   | lower 95% CI | upper 95% CI |
|-----------------------------------------|----------------------|------|--------------|--------------|
| age (per 10 years)                      | 0.12                 | 1.4  | 0.92         | 2            |
| pretreatment                            | $1.8 \times 10^{-4}$ | 8.8  | 2.8          | 27           |
| trisomy 12                              | 0.01                 | 6.1  | 1.5          | 25           |
| del(11)(q22.3)                          | 0.99                 | 1    | 0.34         | 3            |
| del(17)(p13)                            | 0.92                 | 1.1  | 0.3          | 3.8          |
| TP53                                    | 0.72                 | 0.81 | 0.26         | 2.5          |
| U-CLL                                   | 0.04                 | 2.9  | 1.1          | 8.1          |
| doxorubicine (per 10% viability change) | 0.03                 | 0.52 | 0.28         | 0.95         |

Table S8: **Multivariate Cox regression model for time to treatment with response to ibrutinib as a covariate.**

The impact of response to ibrutinib on time to treatment was tested considering other important covariates. Complete case analysis was performed for  $n = 152$  CLL patients, of whom 83 received treatment after sample collection. In addition to the main effect, also the interaction term between *IGHV* status and response to ibrutinib was tested (*IGHV*:ibrutinib).

|                                      | <i>p</i> -value      | HR   | lower 95% CI | upper 95% CI |
|--------------------------------------|----------------------|------|--------------|--------------|
| age (per 10 years)                   | 0.28                 | 0.91 | 0.76         | 1.1          |
| pretreatment                         | $9.6 \times 10^{-8}$ | 0.22 | 0.13         | 0.39         |
| trisomy 12                           | 0.25                 | 1.5  | 0.76         | 3            |
| del(11)(q22.3)                       | 0.78                 | 0.91 | 0.48         | 1.7          |
| del(17)(p13)                         | 0.31                 | 1.4  | 0.74         | 2.6          |
| U-CLL                                | 0.01                 | 2.2  | 1.2          | 3.9          |
| ibrutinib (per 10% viability change) | 0.03                 | 1.6  | 1.1          | 2.5          |
| IGHV:ibrutinib                       | 0.04                 | 0.6  | 0.37         | 0.98         |

Table S9: **Multivariate Cox regression model for time to treatment with response to idelalisib as a covariate.**

Similar to Table S8, but with idelalisib instead of ibrutinib.

|                                       | <i>p</i> -value      | HR   | lower 95% CI | upper 95% CI |
|---------------------------------------|----------------------|------|--------------|--------------|
| age (per 10 years)                    | 0.30                 | 0.91 | 0.76         | 1.1          |
| pretreatment                          | $3.4 \times 10^{-8}$ | 0.21 | 0.12         | 0.37         |
| trisomy 12                            | 0.21                 | 1.5  | 0.78         | 3            |
| del(11)(q22.3)                        | 0.67                 | 0.87 | 0.46         | 1.7          |
| del(17)(p13)                          | 0.31                 | 1.4  | 0.74         | 2.6          |
| U-CLL                                 | $8 \times 10^{-3}$   | 2.4  | 1.3          | 4.7          |
| idelalisib (per 10% viability change) | 0.04                 | 1.6  | 1            | 2.6          |
| IGHV:idelalisib                       | 0.07                 | 0.6  | 0.35         | 1.01         |

Table S10: **Multivariate Cox regression model for time to treatment with response to PRT62607 as a covariate.**

Similar to Table S8, but with PRT062607 instead of ibrutinib.

|                                      | <i>p</i> -value      | HR   | lower 95% CI | upper 95% CI |
|--------------------------------------|----------------------|------|--------------|--------------|
| age (per 10 years)                   | 0.4                  | 0.93 | 0.78         | 1.1          |
| pretreatment                         | $2 \times 10^{-8}$   | 0.2  | 0.12         | 0.36         |
| trisomy 12                           | 0.4                  | 1.4  | 0.67         | 2.7          |
| del(11)(q22.3)                       | 0.58                 | 0.83 | 0.43         | 1.6          |
| del(17)(p13)                         | 0.42                 | 1.3  | 0.69         | 2.4          |
| U-CLL                                | $4.5 \times 10^{-3}$ | 2.7  | 1.4          | 5.4          |
| PRT062607 (per 10% viability change) | 0.01                 | 1.6  | 1.1          | 2.4          |
| IGHV:PRT062607                       | 0.02                 | 0.58 | 0.37         | 0.91         |

## References

- [1] Michael Boutros, Lgia P Bras, and Wolfgang Huber. Analysis of cell-based rna screens. *Genome Biology*, 7(7):R66, 2006.
- [2] H. Li, B. Handsaker, A. Wysoker, T. Fennell, J. Ruan, N. Homer, G. Marth, G. Abecasis, and R. Durbin. The Sequence Alignment/Map format and SAMtools. *Bioinformatics*, 25(16):2078–2079, Aug 2009.
- [3] K. Wang, M. Li, and H. Hakonarson. Annovar: functional annotation of genetic variants from high-throughput sequencing data. *Nucleic Acids Res*, 38(16):e164, 2010.
- [4] A. Dobin, C. A. Davis, F. Schlesinger, J. Drenkow, C. Zaleski, S. Jha, P. Batut, M. Chaisson, and T. R. Gingeras. Star: ultrafast universal rna-seq aligner. *Bioinformatics*, 29(1):15–21, 2012.
- [5] Simon Anders, Paul Theodor Pyl, and Wolfgang Huber. HTSeq – a Python framework to work with high-throughput sequencing data. *Bioinformatics*, 31(2):166–169, 2015.
- [6] Michael I Love, Wolfgang Huber, and Simon Anders. Moderated estimation of fold change and dispersion for RNA-seq data with DESeq2. *Genome Biology*, 15(12):550, 2014.
- [7] AB Olshen, ES Venkatraman, R Lucito, and M Wigler. Circular binary segmentation for the analysis of array-based dna copy number data. *Biostatistics*, 5:557–572, 2004.
- [8] J. Staaf, D. Lindgren, J. Vallon-Christersson, A. Isaksson, H. Goransson, G. Juliusson, R. Rosenquist, M. Hoglund, A. Borg, and M. Ringner. Segmentation-based detection of allelic imbalance and loss-of-heterozygosity in cancer cells using whole genome snp arrays. *Genome Biology*, 9(9):R136, 2008.
- [9] Seon-Young Kim and David J Volsky. PAGE: parametric analysis of gene set enrichment. *BMC Bioinformatics*, 6(5):73–85, 2005.
- [10] Berthold Lausen, Rudolf Lerche, and Martin Schumacher. Maximally Selected Rank Statistics for Dose-Response Problems. *Biometrical Journal*, 44(2):131–147, 2002.
- [11] Jerome H. Friedman, Trevor Hastie, and Rob Tibshirani. Regularization paths for generalized linear models via coordinate descent. *Journal of Statistical Software*, 33(1):1–22, 2 2010.
- [12] Hui Zou. The Adaptive Lasso and Its Oracle Properties. *Journal of the American Statistical Association*, 101(476):1418–1429, 2006.
- [13] Jasmin Corso, Kuan-Ting Pan, Roland Walter, Carmen Doebele, Sebastian Mohr, Hanibal Bohnenberger, Philipp Strobel, Christof Lenz, Mikolaj Slabicki, Jennifer Hullein, Federico Comoglio, Michael A. Rieger, Thorsten Zenz, Jurgen Wienands, Michael Engelke, Hubert Serve, Henning Urlaub, and Thomas Oellerich. Elucidation of tonic and activated B-cell receptor signaling in Burkitt’s lymphoma provides insights into regulation of cell survival. *Proceedings of the National Academy of Sciences*, 113(20):5688–5693, 2016.
